# Supplementary material for: A divergent synthetic pathway for pyrimidine-embedded medium-sized azacycles through an N-quaternizing strategy
Source: PubMed Central journal article supplement — Chem Sci. 2018 Oct 18;10(2):569–75. doi: 10.1039/c8sc04061c (PMC6335630; doi:10.1039/c8sc04061c), 2018-10-18
Supplement: SC-010-C8SC04061C-s001.pdf [file SC-010-C8SC04061C-s001.pdf]

## < Supporting Information >

# Divergent Synthetic Pathway for Pyrimidine-Embedded Medium-Sized Azacycles through *N*-quaternizing Strategy

Yoona Choi<sup>1,†</sup>, Heejun Kim<sup>1,†</sup>, and Seung Bum Park<sup>\*,1,2</sup>

<sup>1</sup>*CRI center for Chemical Proteomics, Department of Chemistry*

<sup>2</sup>*Department of Biophysics and Chemical Biology,  
Seoul National University, Seoul 08826, Korea*

[sbpark@snu.ac.kr](mailto:sbpark@snu.ac.kr)

<sup>†</sup>These authors contributed equally to this work.

| S. No. | Content                                                          | Page No. |
|--------|------------------------------------------------------------------|----------|
| I.     | General information                                              | S2       |
| II.    | Synthetic procedure and compound characterization                | S3       |
| III.   | Optimization of N–N bond cleavage reaction conditions            | S20      |
| IV.    | A proposed mechanism of N–N bond cleavage reaction               | S21      |
| V.     | Chemoinformatic analysis                                         | S23      |
| VI.    | X-ray crystallographic analysis data for <b>2a</b> and <b>7a</b> | S25      |
| VII.   | <sup>1</sup> H and <sup>13</sup> C NMR spectra                   | S46      |
| VIII.  | References                                                       | S80      |

## I. General information

All commercially available reagents and solvents were purchased from commercial vendors and used without further purification unless noted otherwise.  $^1\text{H}$  and  $^{13}\text{C}$  NMR spectra were obtained on Agilent 400-MR DD2 Magnetic Resonance System (400 MHz, Agilent Technologies) or Varian Inova-500 (500 MHz, Varian Associates). Chemical shifts were measured in parts per million ( $\delta$ ), referenced to tetramethylsilane (TMS) as the internal standard or to the residual solvent peak ( $\text{CDCl}_3$ ,  $^1\text{H}$ : 7.27,  $^{13}\text{C}$ : 77.00;  $\text{MeOH-}d_4$ ,  $^1\text{H}$ : 3.31,  $^{13}\text{C}$ : 49.15; acetone- $d_6$ ,  $^1\text{H}$ : 2.05,  $^{13}\text{C}$ : 29.92;  $\text{DMSO-}d_6$ ,  $^1\text{H}$ : 2.50,  $^{13}\text{C}$ : 39.50;  $\text{DCM-}d_2$ ,  $^1\text{H}$ : 5.32,  $^{13}\text{C}$ : 54.00). Multiplicities were indicated as follows: s (singlet), d (doublet), t (triplet), q (quartet), quint (quintet), m (multiplet), dd (doublet of doublets), ddd (doublet of doublet of doublets), brs (broad singlet), and so on. Coupling constants were reported in hertz (Hz). Low-resolution mass spectra (LRMS) were analyzed on LCMS-2020 (Shimadzu) using the electrospray ionization (ESI) method. High-resolution mass spectra (HRMS) were analyzed on Compact (Bruker) using the electrospray ionization (ESI) method at the Organic Chemistry Research Center in Sogang University. X-ray crystallographic analysis was performed at Ewha Womans University. The conversion of starting materials was monitored using thin-layer chromatography (TLC) (Merck Kieselgel 60 F<sub>254</sub> plates), and components were visualized by observation under UV light (254 and 365 nm) or by treating the TLC plates with visualizing agents such as  $\text{KMnO}_4$ , phosphomolybdic acid, and ninhydrin followed by thermal visualization. Products were purified by flash column chromatography on Merck Kieselgel 60 (230–400 mesh). All quantum mechanical calculations were performed in Gaussian09W. The ground state structures of synthesized core skeletons were optimized using density functional theory (DFT) at the B3LYP/6-31G\* level. The moment of inertia values of synthesized core skeletons and reported benzannulated medium-sized rings were calculated by PreADMET software for the plotting of principal moment of inertia (PMI).

## II. Synthetic procedure and compound characterization

**Scheme S1.** Synthetic scheme for pyrimidine-containing azacyclic key intermediates **1a–1h**.

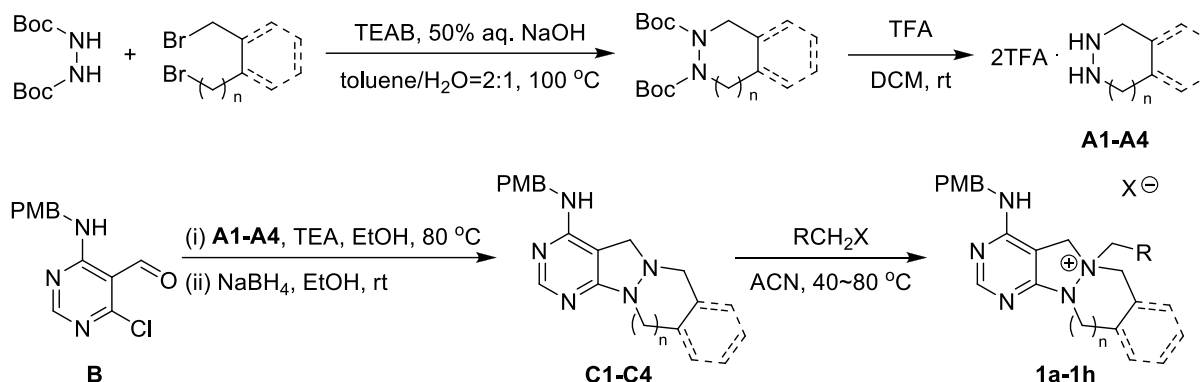

### 1. General synthetic procedure for the preparation of **A1–A4**.

To a solution of di-*tert*-butyl hydrazodicarboxylate (2.0 g, 8.6 mmol) and tetraethylammonium bromide (TEAB, 271.4 mg, 1.3 mmol) in toluene (10 mL), 50% aq. NaOH solution (5 mL) and alkyl dibromide (8.8 mmol) were added at room temperature. The resulting mixture was vigorously stirred at 100 °C. After the completion of the reaction was checked by TLC, the resulting solution was quenched with deionized water and saturated aq. NaCl, and the organic material was extracted twice with ethyl acetate (EA). The combined organic extracts were dried over anhydrous Na₂SO₄(s) and filtered. After the solvent was evaporated under reduced pressure, the residue was purified by silica gel flash column chromatography to obtain the desired Boc protected cyclic hydrazines (1.1~2.3 g, 41~94% yields). The resultant was dissolved in dichloromethane (DCM), and trifluoroacetic acid (TFA) was added. The reaction mixture was stirred at room temperature. After the completion of the reaction was checked by TLC, the resulting solution was concentrated under reduced pressure to obtain the desired compounds **A1–A4** (1.2~2.5 g, quantitative yields).

## 2. General synthetic procedure for the preparation of C1–C4.

Preparation of 4-chloro-6-(4-methoxybenzylamino)pyrimidine-5-carboxaldehyde (**B**) was conducted refer to the reported synthetic procedure.<sup>[1]</sup>

To a solution of **B** (1.0 g, 3.6 mmol) in ethanol (36 mL, 0.1 M), triethylamine (TEA, 2.5 mL, 18.0 mmol) and cyclic hydrazines **A1–A4** (4.0 mmol) were added at room temperature. The resulting mixture was stirred at 80 °C. After the complete consumption of starting material was checked by TLC, the reaction mixture was cooled down to room temperature. NaBH<sub>4</sub> (408.7 mg, 10.8 mmol) was added to the reaction mixture, and the resulting mixture was stirred at room temperature. When the completion of the reaction was checked by TLC, the resulting mixture was concentrated under reduced pressure, quenched with deionized water and saturated aq. NaCl, and the organic material was extracted three times with EA. The combined organic extracts were dried over anhydrous Na<sub>2</sub>SO<sub>4</sub>(s) and filtered. After the solvent was evaporated under reduced pressure, the residue was purified by silica gel flash column chromatography to obtain the desired compounds **C1–C4**.

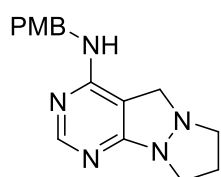

(**C1**) Yield: 66%, 706.7 mg; pale yellow oil; <sup>1</sup>H NMR (400 MHz, acetone-*d*<sub>6</sub>) δ 8.13 (s, 1 H), 7.27 (d, *J* = 8.6 Hz, 2 H), 6.86 (d, *J* = 8.6 Hz, 2 H), 6.43 (brs., 1 H), 4.61 (d, *J* = 5.5 Hz, 2 H), 4.03 (brs, 2 H), 3.76 (s, 3 H), 3.01 (brs, 4 H), 1.97 (brs, 2 H); <sup>13</sup>C NMR (100 MHz, acetone-*d*<sub>6</sub>) δ 170.9, 159.8, 159.6, 158.8, 133.2, 129.6, 114.6, 95.2, 55.5, 52.2, 51.9, 46.0, 44.4, 26.5; LRMS (ESI) *m/z* calcd for C<sub>16</sub>H<sub>20</sub>N<sub>5</sub>O [M+H]<sup>+</sup>: 298.17; Found: 298.05.

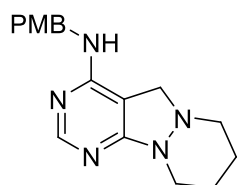

(**C2**) Yield: 81%, 908.2 mg; pale yellow solid; <sup>1</sup>H NMR (400 MHz, CDCl<sub>3</sub>) δ 8.18 (s, 1 H), 7.24 (d, *J* = 8.2 Hz, 2 H), 6.87 (d, *J* = 8.2 Hz, 2 H), 4.54 (s, 3 H), 3.90 (brs, 3 H), 3.80 (s, 3 H), 2.81 (brs, 2 H), 1.76 (quint, *J* = 5.6 Hz, 2 H), 1.62 (brs, 2 H); <sup>13</sup>C NMR (100 MHz, CDCl<sub>3</sub>) δ 165.3, 158.9, 157.8, 156.4, 131.0, 128.6, 114.1, 93.3, 55.2, 54.5, 54.1, 45.1, 44.7, 24.5, 23.2; LRMS (ESI) *m/z* calcd for C<sub>17</sub>H<sub>22</sub>N<sub>5</sub>O [M+H]<sup>+</sup>: 312.18; Found: 312.15.

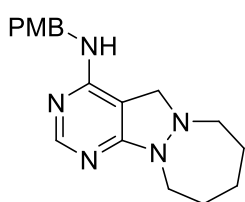

(**C3**) Yield: 68%, 796.8 mg; off-white solid;  $^1\text{H}$  NMR (500 MHz,  $\text{CDCl}_3$ )  $\delta$  8.21 (s, 1 H), 7.24 (d,  $J = 8.4$  Hz, 2 H), 6.87 (m,  $J = 8.8$  Hz, 2 H), 4.56 (d,  $J = 5.4$  Hz, 2 H), 4.51 (brs, 1 H), 4.11 (s, 2 H), 3.79 (s, 3 H), 3.52 (t,  $J = 5.9$  Hz, 2 H), 2.89 (t,  $J = 5.9$  Hz, 2 H), 1.83 (quint,  $J = 4.9$  Hz, 2 H), 1.742-1.737 (m, 4 H);  $^{13}\text{C}$  NMR (100 MHz,  $\text{CDCl}_3$ )  $\delta$  166.9, 159.0, 158.2, 156.5, 130.9, 128.8, 114.0, 94.0, 62.0, 56.3, 55.3, 50.4, 44.6, 29.0, 27.5, 25.0; LRMS (ESI)  $m/z$  calcd for  $\text{C}_{18}\text{H}_{24}\text{N}_5\text{O}$   $[\text{M}+\text{H}]^+$ : 326.20; Found: 326.10.

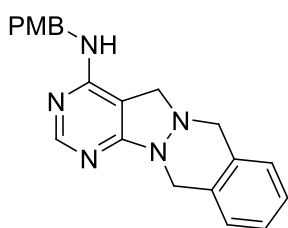

(**C4**) Yield: 36%, 465.9 mg; pale yellow solid;  $^1\text{H}$  NMR (500 MHz,  $\text{CDCl}_3$ )  $\delta$  8.27 (s, 1 H), 7.18–7.28 (m, 5 H), 7.09 (d,  $J = 6.9$  Hz, 1 H), 6.89 (d,  $J = 8.9$  Hz, 2 H), 4.59–4.61 (m, 4 H), 4.13 (brs, 1 H), 4.05 (brs, 2 H), 3.80 (s, 3 H);  $^{13}\text{C}$  NMR (100 MHz,  $\text{CDCl}_3$ )  $\delta$  166.3, 159.0, 157.9, 156.5, 132.9, 131.5, 130.8, 128.7, 126.8, 126.6, 126.5, 126.4, 114.1, 94.5, 57.0, 55.3, 54.3, 48.7, 44.7; LRMS (ESI)  $m/z$  calcd for  $\text{C}_{21}\text{H}_{22}\text{N}_5\text{O}$   $[\text{M}+\text{H}]^+$ : 360.18; Found: 360.10.

### 3. General synthetic procedure for the preparation of **1a–1h**.

To a solution of pyrimidine-embedded tricyclic/tetracyclic precursor **C1–C4** (0.96 mmol) in acetonitrile (ACN, 4.8 mL, 0.2 M), halide partner (2.89 mmol) was added at room temperature. The resulting mixture was stirred at 40~80 °C depending on halide partners. After the complete consumption of starting material was checked by TLC, the reaction mixture was concentrated under reduced pressure to obtain the desired compounds **1a–1c** and **1h**. In the case of **1d–1g**, further purification was performed by silica-gel flash column chromatography. *tert*-Butyl(2-iodoethoxy)diphenylsilane and *tert*-butyl(3-iodopropoxy)diphenylsilane, for **1d** and **1e** respectively, were synthesized on the basis of the reported synthetic procedure.<sup>[2]</sup>

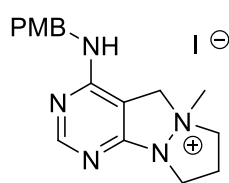

**(1a)** Yield: 99% from **C1**, 419.0 mg; yellow solid;  $^1\text{H}$  NMR (500 MHz,  $\text{MeOH-}d_4$ )  $\delta$  8.33 (s, 1 H), 7.29 (d,  $J = 8.3$  Hz, 2 H), 8.86 (d,  $J = 8.8$  Hz, 2 H), 5.28 (d,  $J = 13.7$  Hz, 1 H), 4.96 (d,  $J = 13.7$  Hz, 1 H), 4.62 (s, 2 H), 4.13–4.21 (m, 1 H), 4.07–4.11 (m, 1 H), 3.79–3.87 (m, 2 H), 3.76 (s, 3 H), 3.62 (s, 3 H), 2.55–2.64 (m, 1 H), 2.38–2.47 (m, 1 H);  $^{13}\text{C}$  NMR (100 MHz,  $\text{acetone-}d_6$ )  $\delta$  165.4, 160.3, 159.8, 158.2, 132.2, 130.2, 114.5, 92.4, 68.5, 65.8, 55.6, 54.5, 49.8, 43.9, 43.8, 25.2; LRMS (ESI)  $m/z$  calcd for  $\text{C}_{17}\text{H}_{22}\text{N}_5\text{O}^+$   $[\text{M}]^+$ : 312.18; Found: 312.10.

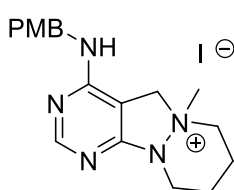

**(1b)** Yield: 99% from **C2**, 432.4 mg; off-white solid;  $^1\text{H}$  NMR (500 MHz,  $\text{DMSO-}d_6$ )  $\delta$  8.31 (s, 1 H), 8.00 (t,  $J = 5.6$  Hz, 1 H), 7.26 (d,  $J = 8.3$  Hz, 2 H), 6.89 (d,  $J = 8.3$  Hz, 2 H), 4.95 (ABq,  $\Delta\delta_{\text{AB}} = 0.07$ ,  $J_{\text{AB}} = 13.7$  Hz, 2 H), 4.50–4.60 (m, 2 H), 4.10 (d,  $J = 15.2$  Hz, 1 H), 3.77 (s, 3 H), 3.72 (s, 5 H), 3.66–3.69 (m, 1 H), 2.15–2.26 (m, 1 H), 1.75 (d,  $J = 14.7$  Hz, 1 H), 1.59 (d,  $J = 13.2$  Hz, 1 H), 1.40–1.48 (m, 1 H);  $^{13}\text{C}$  NMR (100 MHz,  $\text{DMSO-}d_6$ )  $\delta$  161.3, 158.8, 158.3, 156.6, 131.0, 128.7, 113.7, 89.6, 67.5, 59.4, 55.2, 55.1, 48.4, 48.3, 42.8, 40.6, 18.6, 17.9; LRMS (ESI)  $m/z$  calcd for  $\text{C}_{18}\text{H}_{24}\text{N}_5\text{O}^+$   $[\text{M}]^+$ : 326.20; Found: 326.20.

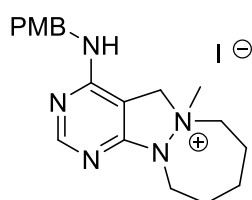

**(1c)** Yield: 99% from **C3**, 445.8 mg; pale yellow solid;  $^1\text{H}$  NMR (400 MHz,  $\text{MeOH-}d_4$ )  $\delta$  8.24 (s, 1 H), 7.30 (d,  $J = 8.6$  Hz, 2 H), 6.87 (d,  $J = 8.6$  Hz, 2 H), 5.16 (ABq,  $\Delta\delta_{\text{AB}} = 0.07$ ,  $J_{\text{AB}} = 14.1$  Hz, 2 H), 4.60 (ABq,  $\Delta\delta_{\text{AB}} = 0.03$ ,  $J_{\text{AB}} = 15.3$  Hz, 2 H), 4.26–4.33 (m, 2 H), 4.03 (dd,  $J = 14.1$ , 8.6 Hz, 1 H), 3.81–3.87 (m, 1 H), 3.76 (s, 3 H), 3.61 (s, 3 H), 1.96–2.09 (m, 2 H), 1.80–1.87 (m, 4 H), 1.63–1.70 (m, 2 H);  $^{13}\text{C}$  NMR (100 MHz,  $\text{DMSO-}d_6$ )  $\delta$  161.7, 160.6, 160.4, 157.8, 132.3, 130.3, 115.1, 88.4, 71.9, 71.0, 57.1, 55.9, 45.0, 44.7, 28.1, 27.1, 24.1; LRMS (ESI)  $m/z$  calcd for  $\text{C}_{19}\text{H}_{26}\text{N}_5\text{O}^+$   $[\text{M}]^+$ : 340.21; Found: 340.15.

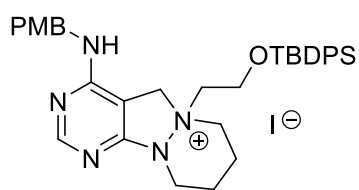

**(1d)** Yield: 72% from **C2**, 500.7 mg; yellow solid;  $^1\text{H}$  NMR (500 MHz,  $\text{MeOH-}d_4$ )  $\delta$  8.34 (s, 1 H), 7.63 (d,  $J = 6.4$  Hz, 2 H), 7.53 (d,  $J = 6.8$  Hz, 2 H), 7.38–7.46 (m, 4 H), 7.33 (t,  $J = 7.35$  Hz, 2 H), 7.28 (d,  $J = 8.3$  Hz, 2 H), 6.83 (d,  $J = 8.8$  Hz, 2 H), 5.70 (d,  $J = 13.2$  Hz, 1 H), 5.01 (d,  $J = 13.2$  Hz, 1 H), 4.70 (d,  $J = 14.7$  Hz, 1 H), 4.52 (d,  $J = 15.2$  Hz, 1 H), 4.33–4.42 (m, 2 H), 4.18–4.27 (m, 2 H), 4.08 (d,  $J = 13.2$  Hz, 1 H), 3.83–3.94 (m, 2 H), 3.74 (s, 3 H), 3.47–3.53 (m, 1 H), 2.29–2.37 (m, 1 H), 1.88 (d,  $J = 15.2$  Hz, 1 H), 1.61–1.64 (m, 2 H), 0.95 (s, 9 H);  $^{13}\text{C}$  NMR (100 MHz,  $\text{DMSO-}d_6$ )  $\delta$  162.9, 160.5, 158.6, 136.8, 136.7, 133.0, 132.9, 132.3, 131.5, 130.3, 129.30, 129.26, 115.0, 90.4, 68.8, 63.2, 61.4, 60.0, 55.91, 55.87, 44.8, 42.8, 29.7, 27.3, 19.9, 19.8; LRMS (ESI)  $m/z$  calcd for  $\text{C}_{35}\text{H}_{44}\text{N}_5\text{O}_2\text{Si}^+$   $[\text{M}]^+$ : 594.33; Found: 594.40.

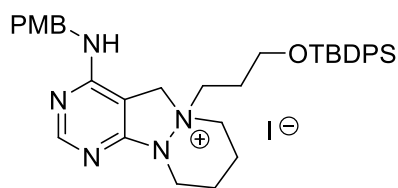

**(1e)** Yield: 72% from **C2**, 510.4 mg; yellow solid;  $^1\text{H}$  NMR (400 MHz,  $\text{MeOH-}d_4$ )  $\delta$  8.29 (s, 1 H), 7.68 (d,  $J = 7.4$  Hz, 4 H), 7.39–7.44 (m, 6 H), 7.30 (d,  $J = 8.6$  Hz, 2 H), 6.86 (d,  $J = 8.6$  Hz, 2 H), 4.88 (ABq,  $\Delta\delta_{\text{AB}} = 0.04$ ,  $J_{\text{AB}} = 13.7$  Hz, 2 H), 4.61 (s, 2 H), 4.15–4.24 (m, 2 H), 4.04–4.11 (m, 1 H), 3.90 (t,  $J = 5.3$  Hz, 2 H), 3.81 (dd,  $J = 13.3$ , 2.8 Hz, 1 H), 3.74 (s, 3 H), 3.68–3.72 (m, 1 H), 3.46–3.54 (m, 1 H), 2.18–2.27 (m, 1 H), 1.96–2.14 (m, 2 H), 1.86 (d,  $J = 15.3$  Hz, 1 H), 1.60–1.64 (m, 2 H), 1.07 (s, 9 H);  $^{13}\text{C}$  NMR (100 MHz,  $\text{DMSO-}d_6$ )  $\delta$  163.0, 160.6, 160.5, 158.7, 136.8, 134.42, 134.36, 132.2, 131.3, 130.3, 129.2, 115.1, 90.4, 60.3, 61.6, 60.6, 58.0, 55.92, 55.89, 45.0, 42.5, 27.8, 27.6, 20.1, 19.7; LRMS (ESI)  $m/z$  calcd for  $\text{C}_{36}\text{H}_{46}\text{N}_5\text{O}_2\text{Si}^+$   $[\text{M}]^+$ : 608.34; Found: 608.30.

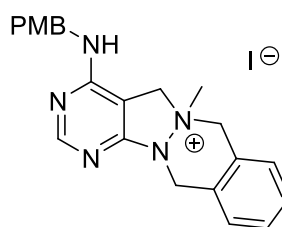

**(1f)** Yield: 49% from **C4**, 236.7 mg; light brown solid;  $^1\text{H}$  NMR (400 MHz,  $\text{CDCl}_3$ )  $\delta$  8.32 (s, 1 H), 7.28–7.43 (m, 6 H), 6.78 (d,  $J = 8.2$  Hz, 2 H), 5.74 (d,  $J = 13.7$  Hz, 1 H), 5.51 (dd,  $J = 19.4$ , 14.3 Hz, 2 H), 5.35 (d,  $J = 17.2$  Hz, 1 H), 5.00 (d,  $J = 14.5$  Hz, 1 H), 4.62–4.68 (m, 3 H), 3.72 (s, 3 H), 3.70 (s, 3 H), 2.55 ppm (brs, 1 H);  $^{13}\text{C}$  NMR (100 MHz,  $\text{CDCl}_3$ )  $\delta$  161.3, 159.5, 158.7, 157.0, 130.5, 129.8, 129.5, 128.7, 128.2, 126.6, 126.3, 124.2, 113.7, 89.4, 69.6, 61.4, 55.2, 50.4, 43.9, 43.6; LRMS (ESI)  $m/z$  calcd for  $\text{C}_{22}\text{H}_{24}\text{N}_5\text{O}^+$   $[\text{M}]^+$ : 374.20; Found: 374.20.

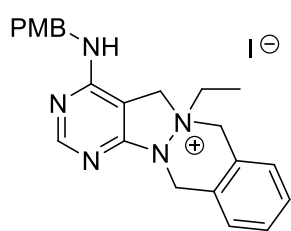

**(1g)** Yield: 62% from **C4**, 307.9 mg; brown solid;  $^1\text{H}$  NMR (400 MHz,  $\text{CDCl}_3$ )  $\delta$  8.31 (s, 1 H), 7.34–7.46 (m, 5 H), 7.29 (d,  $J = 5.5$  Hz, 1 H), 6.76 (d,  $J = 8.2$  Hz, 2 H), 5.68–5.74 (m, 1 H), 5.38–5.45 (m, 2 H), 5.30 (d,  $J = 14.9$  Hz, 1 H), 5.00 (d,  $J = 14.9$  Hz, 1 H), 4.61–4.66 (m, 3 H), 4.15–4.24 (m, 1 H), 3.77–3.87 (m, 1 H), 3.69 (s, 3 H), 2.59 (brs, 1 H), 1.50 (t,  $J = 7.0$  Hz, 3 H);  $^{13}\text{C}$  NMR (100 MHz,  $\text{CDCl}_3$ )  $\delta$  161.8, 159.5, 158.7, 157.0, 130.5, 129.9, 129.6, 128.8, 128.3, 127.8, 126.2, 124.0, 113.7, 89.3, 66.3, 59.8, 59.1, 55.1, 44.8, 43.6, 9.4; LRMS (ESI)  $m/z$  calcd for  $\text{C}_{23}\text{H}_{26}\text{N}_5\text{O}^+$   $[\text{M}]^+$ : 388.21; Found: 388.20.

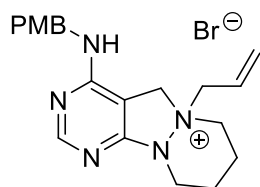

**(1h)** Yield: 99% from **C2**, 412.4 mg; off-white solid;  $^1\text{H}$  NMR (500 MHz,  $\text{MeOH-}d_4$ )  $\delta$  8.29 (s, 1 H), 7.29 (d,  $J = 8.3$  Hz, 2 H), 6.86 (d,  $J = 8.3$  Hz, 2 H), 6.02–6.11 (m, 1 H), 5.85 (d,  $J = 16.6$  Hz, 1 H), 5.74 (d,  $J = 10.3$  Hz, 1 H), 5.01 (d,  $J = 13.2$  Hz, 1 H), 4.72–4.80 (m, 3 H), 4.61 (s, 2 H), 4.27 (d,  $J = 14.7$  Hz, 1 H), 3.78–3.83 (m, 1 H), 3.75 (s, 3 H), 3.67–3.72 (m, 2 H), 2.34–2.42 (m, 1 H), 1.87 (d,  $J = 15.2$  Hz, 1 H), 1.72 (d,  $J = 13.2$  Hz, 1 H), 1.59–1.67 (m, 1 H);  $^{13}\text{C}$  NMR (100 MHz,  $\text{MeOH-}d_4$ )  $\delta$  163.2, 160.6, 160.4, 158.7, 132.3, 130.2, 129.2, 126.3, 115.0, 90.6, 65.8, 62.8, 59.6, 55.9, 55.8, 44.9, 42.4, 19.9, 19.4; LRMS (ESI)  $m/z$  calcd for  $\text{C}_{20}\text{H}_{26}\text{N}_5\text{O}^+$   $[\text{M}]^+$ : 352.21; Found: 352.10.



**Scheme S2.** Synthetic scheme for scaffold I (**2a–2f** and **D**).

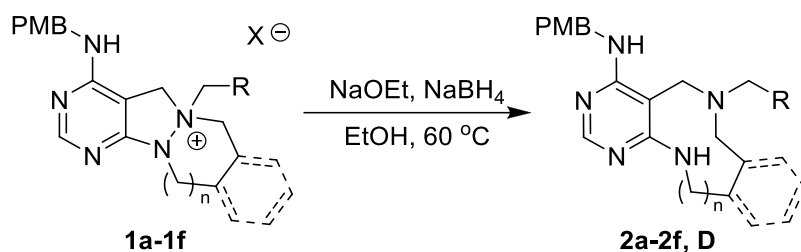

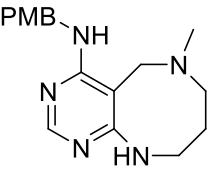 (**2a**) Yield: 69% from **1a**, 34.7 mg; off-white solid;  $^1\text{H}$  NMR (400 MHz,  $\text{MeOH-}d_4$ )  $\delta$  7.83 (s, 1 H), 7.23 (d,  $J = 8.2$  Hz, 2 H), 6.84 (d,  $J = 8.6$  Hz, 2 H), 4.52 (s, 2 H), 3.95 (s, 2 H), 3.76 (s, 3 H), 3.66 (t,  $J = 6.3$  Hz, 2 H), 2.74 (t,  $J = 5.1$  Hz, 2 H), 2.40 (s, 3 H), 1.96–1.98 (m, 2 H);  $^{13}\text{C}$  NMR (100 MHz,  $\text{MeOH-}d_4$ )  $\delta$  164.1, 164.0, 160.3, 157.1, 133.3, 129.8, 114.9, 90.0, 55.8, 50.0, 48.1, 45.5, 43.5, 42.3, 29.2; HRMS (ESI)  $m/z$  calcd for  $\text{C}_{17}\text{H}_{24}\text{N}_5\text{O}$   $[\text{M}+\text{H}]^+$ : 314.1975; Found: 314.1976.

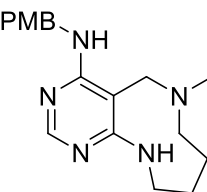 (**2b**) Yield: 84% from **1b**, 44.2 mg; colorless oil;  $^1\text{H}$  NMR (400 MHz,  $\text{CDCl}_3$ )  $\delta$  8.30 (s, 1 H), 8.17 (brs, 1 H), 7.27 (d,  $J = 8.2$  Hz, 2 H), 6.88 (d,  $J = 8.2$  Hz, 2 H), 4.56–4.60 (m, 3 H), 3.80 (s, 3 H), 3.43 (brs, 2 H), 3.40 (s, 2 H), 2.44 (s, 3 H), 2.28–2.30 (m, 2 H), 1.61–1.63 (m, 2 H), 1.55–1.57 (m, 2 H);  $^{13}\text{C}$  NMR (100 MHz,  $\text{CDCl}_3$ )  $\delta$  164.4, 160.4, 158.9, 156.5, 131.2, 129.1, 114.0, 95.1, 55.7, 55.2, 53.4, 45.2, 44.8, 44.4, 31.4, 28.1; HRMS (ESI)  $m/z$  calcd for  $\text{C}_{18}\text{H}_{26}\text{N}_5\text{O}$   $[\text{M}+\text{H}]^+$ : 328.2132; Found: 328.2130.

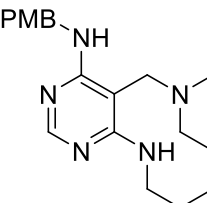 (**2c**) Yield: 56% from **1c**, 30.7 mg; colorless oil;  $^1\text{H}$  NMR (400 MHz,  $\text{CDCl}_3$ )  $\delta$  8.71 (brs, 1 H), 8.25 (s, 1 H), 7.27 (d,  $J = 8.2$  Hz, 2 H), 6.88 (d,  $J = 8.6$  Hz, 2 H), 4.58 (d,  $J = 5.1$  Hz, 2 H), 4.28 (brs, 1 H), 3.80 (s, 3 H), 3.31 (brs, 2 H), 2.32 (s, 3 H), 1.60 (brs, 6 H);  $^{13}\text{C}$  NMR (100 MHz,  $\text{CDCl}_3$ )  $\delta$  163.1, 159.5, 158.9, 156.3, 131.5, 129.1, 114.0, 91.9, 55.3, 55.2, 53.7, 49.3, 45.0, 43.7, 41.5, 27.0, 26.2, 21.6; HRMS (ESI)  $m/z$  calcd for  $\text{C}_{19}\text{H}_{28}\text{N}_5\text{O}$   $[\text{M}+\text{H}]^+$ : 342.2288; Found: 342.2284.

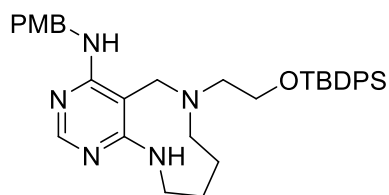

**(2d)** Yield: 71% from **1d**, 67.9 mg; off-white oil;  $^1\text{H}$  NMR (400 MHz,  $\text{CDCl}_3$ )  $\delta$  8.31 (s, 1 H), 8.25 (brs, 1 H), 7.65–7.67 (m, 4 H), 7.34–7.42 (m, 6 H), 7.25 (d,  $J = 8.6$  Hz, 2 H), 6.87 (d,  $J = 8.2$  Hz, 2 H), 4.57 (d,  $J = 5.1$  Hz, 2 H), 4.36 (brs, 1 H), 3.77–3.79 (m, 5 H), 3.41 (brs, 4 H), 2.75 (t,  $J = 5.5$  Hz, 2 H), 2.34 (brs, 2 H), 1.60–1.61 (m, 2 H), 1.53 (brs, 2 H), 1.04 (s, 9 H);  $^{13}\text{C}$  NMR (100 MHz,  $\text{CDCl}_3$ )  $\delta$  164.3, 160.3, 159.0, 156.4, 135.6, 133.3, 131.2, 129.7, 129.2, 127.7, 114.0, 95.2, 61.7, 58.9, 55.3, 54.6, 51.1, 45.3, 44.9, 31.4, 28.8, 26.8, 19.1; HRMS (ESI)  $m/z$  calcd for  $\text{C}_{35}\text{H}_{46}\text{N}_5\text{O}_2\text{Si}$   $[\text{M}+\text{H}]^+$ : 596.3415; Found: 596.3413.

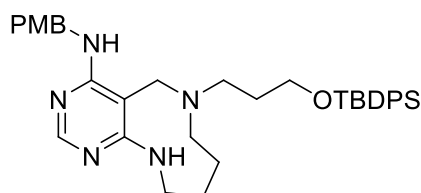

**(2e)** Yield: 69% from **1e**, 67.6 mg; colorless oil;  $^1\text{H}$  NMR (400 MHz,  $\text{CDCl}_3$ )  $\delta$  8.30 (s, 1 H), 8.16 (brs, 1 H), 7.66 (d,  $J = 6.3$  Hz, 4 H), 7.35–7.43 (m, 6 H), 7.27 (d,  $J = 8.2$  Hz, 2 H), 6.88 (d,  $J = 8.2$  Hz, 2 H), 4.58 (d,  $J = 4.7$  Hz, 2 H), 4.47 (brs, 1 H), 3.79 (s, 3 H), 3.74 (t,  $J = 6.1$  Hz, 2 H), 3.35 (brs, 4 H), 2.72 (t,  $J = 7.2$  Hz, 2 H), 2.31 (brs, 2 H), 1.76 (quint,  $J = 6.6$  Hz, 2 H), 1.58 (brs, 2 H), 1.52 (brs, 2 H), 1.05 (s, 9 H);  $^{13}\text{C}$  NMR (100 MHz,  $\text{CDCl}_3$ )  $\delta$  164.3, 160.4, 159.0, 156.4, 135.5, 133.7, 131.2, 129.6, 129.2, 127.6, 114.0, 95.2, 61.7, 55.3, 54.7, 54.2, 51.1, 45.4, 44.9, 31.3, 30.8, 29.0, 26.8, 19.2; HRMS (ESI)  $m/z$  calcd for  $\text{C}_{36}\text{H}_{48}\text{N}_5\text{O}_2\text{Si}$   $[\text{M}+\text{H}]^+$ : 610.3572; Found: 610.3569.

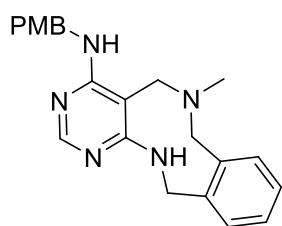

**(2f)** Yield: 14% from **1f**, 8.4 mg; off-white solid;  $^1\text{H}$  NMR (500 MHz,  $\text{DMSO}-d_6$ )  $\delta$  7.75 (s, 1 H), 7.15–7.20 (m, 4 H), 7.07 (d,  $J = 8.3$  Hz, 2 H), 6.84 (d,  $J = 8.3$  Hz, 2 H), 6.73 (brs, 1 H), 6.62 (brs, 1 H), 4.45 (brs, 4 H), 3.73 (s, 3 H), 3.51 (s, 2 H), 3.40 (s, 2 H), 2.45 (s, 3 H);  $^{13}\text{C}$  NMR (100 MHz,  $\text{DCM}-d_2$ )  $\delta$  163.7, 159.2, 156.0, 137.6, 132.5, 131.5, 130.0, 128.8, 128.5, 127.7, 114.2, 98.5, 59.3, 55.8, 48.8, 46.8, 44.3, 30.3; HRMS (ESI)  $m/z$  calcd for  $\text{C}_{22}\text{H}_{26}\text{N}_5\text{O}$   $[\text{M}+\text{H}]^+$ : 376.2132; Found: 376.2135.

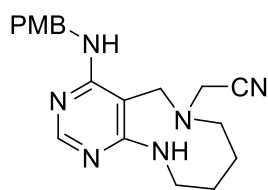

**(D)** Yield: 33% from **1b**, 18.7 mg; yellow solid;  $^1\text{H}$  NMR (500 MHz,  $\text{CDCl}_3$ )  $\delta$  8.30 (s, 1 H) 7.27 (d,  $J = 8.5$  Hz, 2 H), 7.13 (brs, 1 H), 6.88 (d,  $J = 8.5$  Hz, 2 H), 4.66 (t,  $J = 4.8$  Hz, 1 H), 4.61 (d,  $J = 5.5$  Hz, 2 H), 3.80 (s, 3 H), 3.69 (s, 2 H), 3.60 (s, 2 H), 3.45 (brs, 2 H), 2.52 (t,  $J = 4.0$  Hz, 2 H), 1.64–1.69 (m, 2 H), 1.59–1.60 (m, 2 H);  $^{13}\text{C}$  NMR (100 MHz,  $\text{CDCl}_3$ )  $\delta$  164.0, 160.6, 159.0, 156.9, 131.0, 129.1, 115.2, 114.1, 93.4, 55.3, 55.2, 52.3, 50.5, 45.1, 44.8, 44.3, 31.0, 27.8; LRMS (ESI)  $m/z$  calcd for  $\text{C}_{19}\text{H}_{25}\text{N}_6\text{O}$   $[\text{M}+\text{H}]^+$ : 353.21; Found: 353.10.

**Scheme S5.** Synthetic scheme for scaffold II (**3a–3b**).

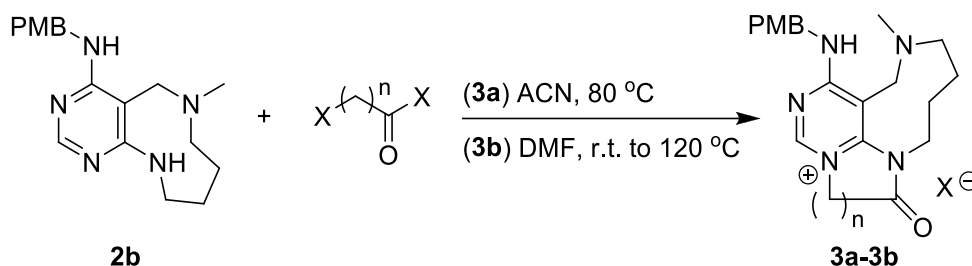

**(3a)** Yield: 80%, 84.1 mg; dark red solid;  $^1\text{H}$  NMR (400 MHz,  $\text{CDCl}_3$ )  $\delta$  9.02 (s, 1 H), 7.28 (d,  $J = 8.2$  Hz, 2 H), 6.84 (d,  $J = 7.8$  Hz, 2 H), 5.35 (s, 2 H), 4.76 (s, 2 H), 4.09 (brs, 2 H), 3.76 (s, 6 H), 3.41 (s, 2 H), 2.78 (s, 2 H), 2.40 (brs, 3 H), 1.82 (brs, 2 H), 1.70 (s, 2 H);  $^{13}\text{C}$  NMR (100 MHz,  $\text{CDCl}_3$ )  $\delta$  167.6, 163.5, 159.0, 150.5, 148.5, 129.1, 128.7, 114.0, 93.2, 55.2, 53.9, 50.4, 50.3, 47.3, 45.1, 42.5, 42.4, 29.2, 21.4; HRMS (ESI)  $m/z$  calcd for  $\text{C}_{20}\text{H}_{27}\text{N}_5\text{O}_2^+$   $[\text{M}]^+$ : 368.2081; Found: 368.2080.

**(3b)** Yield: 67%, 65.6 mg; off-white solid;  $^1\text{H}$  NMR (500 MHz,  $\text{MeOH-}d_4$ )  $\delta$  8.57 (s, 1 H), 7.30 (d,  $J = 8.3$  Hz, 2 H), 6.88 (d,  $J = 8.3$  Hz, 3 H), 4.78 (s, 2 H), 4.38 (t,  $J = 5.9$  Hz, 2 H), 3.96 (brs, 2 H), 3.76 (s, 3 H), 3.60 (brs, 2 H), 2.89 (t,  $J = 5.9$  Hz, 2 H), 2.63–2.66 (m, 2 H), 2.25 (s, 3 H), 1.89 (brs, 2 H), 1.79 (brs, 2 H);  $^{13}\text{C}$  NMR (100 MHz,  $\text{MeOH-}d_4$ )  $\delta$  169.6, 165.0, 160.8, 152.2, 149.3, 130.9, 130.3, 115.2, 104.3, 57.0, 55.91, 55.86, 51.3, 46.9, 46.1, 44.0, 32.5, 28.4, 27.4; HRMS (ESI)  $m/z$  calcd for  $\text{C}_{21}\text{H}_{28}\text{N}_5\text{O}_2^+$   $[\text{M}]^+$ : 382.2238; Found: 382.2238.

**Scheme S6.** Synthetic scheme for scaffold III (**4a–4b**).

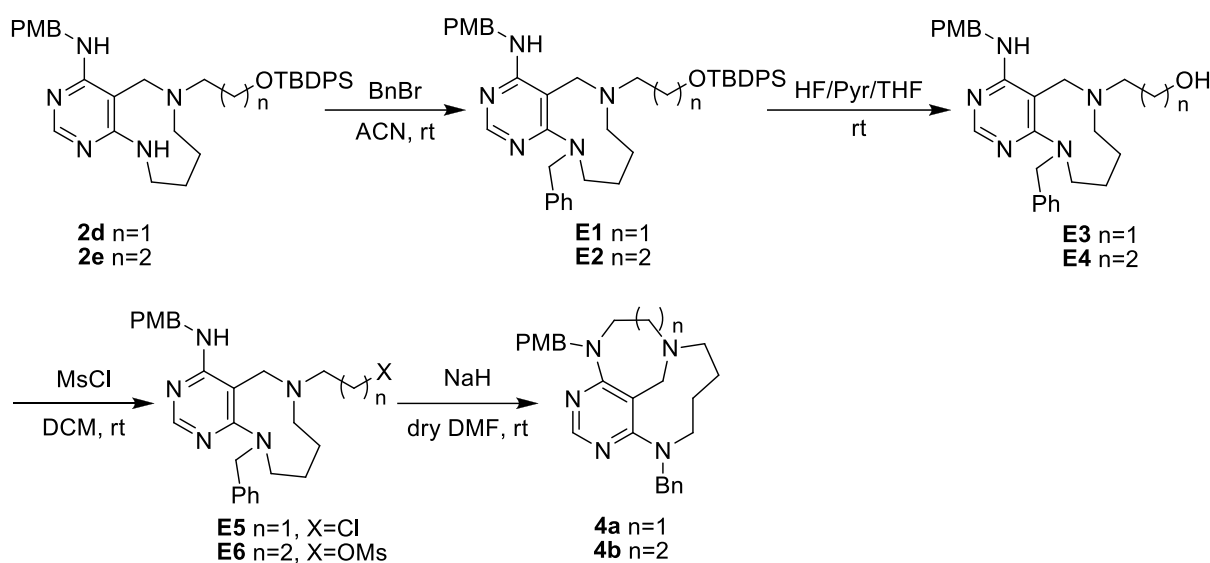

To a solution of **2d–2e** (0.73 mmol) in ACN (14.6 mL, 0.05 M), benzyl bromide (130.5  $\mu$ L, 1.10 mmol) was added at room temperature with stirring. When the completion of the reaction was checked by TLC, the resulting mixture was concentrated under reduced pressure, quenched with deionized water and saturated aq. NaHCO<sub>3</sub>, and the organic material was extracted three times with EA and three times with DCM. The combined organic extracts were dried over anhydrous Na<sub>2</sub>SO<sub>4</sub>(s) and filtered. The solvent was evaporated under reduced pressure, and the residue was purified by silica gel flash column chromatography to obtain the desired compounds **E1** (84% yield from **2d**, 420.6 mg) and **E2** (87% yield from **2e**, 444.6 mg). **E1** and **E2** (0.26 mmol) were treated with HF/pyridine/tetrahydrofuran (5/5/90) solution (2.6 mL, 0.1 M), and the reaction mixture was stirred at room temperature. When the completion of the reaction was checked by TLC, ethoxytrimethylsilane was added and allowed to quench any excess HF. The resulting mixture was concentrated under reduced pressure, and the residue was purified by silica gel flash column chromatography to obtain the desired compounds **E3** (57% yield from **E1**, 66.3 mg) and **E4** (49% yield from **E2**, 58.8 mg). To a solution of **E3** or **E4** (0.13 mmol) in DCM (2.6 mL, 0.05 M), TEA (36.2  $\mu$ L, 0.26 mmol) and methanesulfonyl chloride (15.1  $\mu$ L, 0.20 mmol) were added at room temperature with stirring. When the completion of the reaction was checked by TLC, the resulting mixture was quenched with deionized water and saturated aq. NaHCO<sub>3</sub>, and the organic material was extracted three times with DCM and three times with EA. The combined organic extracts were dried over anhydrous

Na<sub>2</sub>SO<sub>4</sub>(s) and filtered. The solvent was evaporated under reduced pressure, and the residue was purified by silica gel flash column chromatography to obtain the desired compounds **E5** (22% yield from **E3**, 13.3 mg) and **E6** (57% yield from **E4**, 40.0 mg).

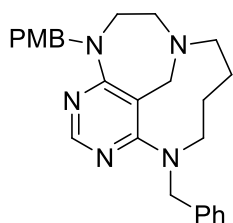

**(4a)** Yield: 80% from **E5**, 17.5 mg; colorless oil; <sup>1</sup>H NMR (500 MHz, CDCl<sub>3</sub>) δ 8.24 (s, 1 H), 7.26–7.33 (m, 7 H), 6.87 (d, *J* = 8.8 Hz, 2 H), 5.10 (d, *J* = 14.7 Hz, 1 H), 4.97 (d, *J* = 15.2 Hz, 1 H), 4.42 (d, *J* = 14.7 Hz, 2 H), 3.99 (d, *J* = 14.7 Hz, 1 H), 3.80 (s, 3 H), 3.63 (brs, 2 H), 3.44–3.45 (m, 2 H), 3.10 (dd, *J* = 13.2, 9.3 Hz, 1 H), 2.79–2.85 (m, 2 H), 2.65–2.71 (m, 2 H), 1.79–1.83 (m, 1 H), 1.60–1.67 (m, 2 H), 1.44–1.47 (m, 1 H); <sup>13</sup>C NMR (100 MHz, CDCl<sub>3</sub>) δ 167.1, 166.3, 158.7, 154.6, 139.3, 130.9, 129.3, 128.5, 128.3, 127.0, 113.8, 100.5, 55.6, 55.3, 55.2, 54.2, 53.8, 53.6, 53.0, 52.6, 51.7, 28.9, 25.9; HRMS (ESI) *m/z* calcd for C<sub>26</sub>H<sub>32</sub>N<sub>5</sub>O [M+H]<sup>+</sup>: 430.2601; Found: 430.2602.

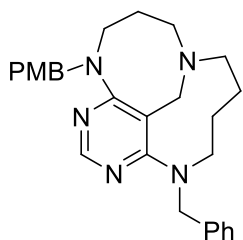

**(4b)** Yield: 40% from **E6**, 9.1 mg; white solid; <sup>1</sup>H NMR (500 MHz, CDCl<sub>3</sub>) δ 8.26 (s, 1 H), 7.39 (d, *J* = 7.3 Hz, 2 H), 7.26–7.29 (m, 2 H), 7.18–7.21 (m, 3 H), 6.85 (d, *J* = 8.3 Hz, 2 H), 5.01 (d, *J* = 14.7 Hz, 1 H), 4.87 (d, *J* = 15.2 Hz, 1 H), 4.81 (dd, *J* = 13.5, 3.7 Hz, 1 H), 4.75 (d, *J* = 15.2 Hz, 1 H), 4.14 (d, *J* = 14.7 Hz, 1 H), 4.05 (d, *J* = 14.7 Hz, 1 H), 3.79 (s, 3 H), 3.49–3.59 (m, 2 H), 3.11 (dd, *J* = 13.9, 2.7 Hz, 1 H), 2.98 (d, *J* = 14.7 Hz, 1 H), 2.88 (dd, *J* = 11.0, 6.1 Hz, 1 H), 2.70–2.75 (m, 2 H), 2.43–2.48 (m, 1 H), 2.21 (t, *J* = 11.2 Hz, 1 H), 1.93–2.04 (m, 1 H), 1.70–1.83 (m, 2 H), 1.45–1.50 (m, 1 H), 1.37–1.40 (m, 1 H); <sup>13</sup>C NMR (100 MHz, CDCl<sub>3</sub>) δ 171.1, 161.3, 158.6, 154.9, 140.4, 131.2, 128.8, 128.5, 128.0, 126.5, 113.8, 105.0, 58.9, 57.3, 57.1, 55.3, 55.2, 55.1, 53.4, 44.9, 28.4, 26.6, 21.4; HRMS (ESI) *m/z* calcd for C<sub>27</sub>H<sub>34</sub>N<sub>5</sub>O [M+H]<sup>+</sup>: 444.2758; Found: 444.2758.

**Scheme S7.** Synthetic scheme for scaffold IV (**5a–5b**).

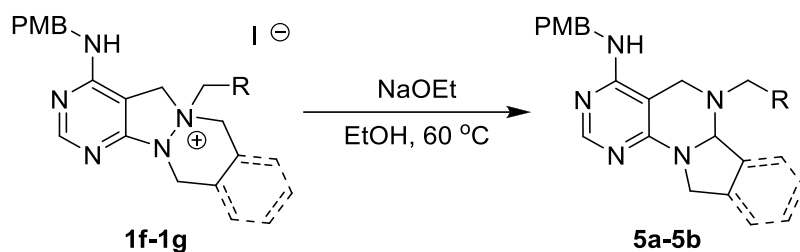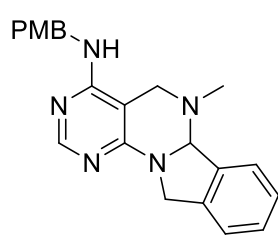

**(5a)** Yield: 47% from **1f**, 26.3 mg; orange solid;  $^1\text{H}$  NMR (500 MHz,  $\text{CDCl}_3$ )  $\delta$  8.31 (s, 1 H), 7.37–7.44 (m, 4 H), 7.29 (d,  $J = 8.3$  Hz, 2 H), 6.89 (d,  $J = 8.3$  Hz, 2 H), 5.85 (s, 1 H), 4.87 (ABq,  $\Delta\delta_{\text{AB}} = 0.04$ ,  $J_{\text{AB}} = 14.9$  Hz, 2 H), 4.56–4.70 (m, 2 H), 4.21 (brs, 1 H), 4.16 (d,  $J = 15.7$  Hz, 1 H), 3.80 (s, 3 H), 3.50 (d,  $J = 15.2$  Hz, 1 H), 1.93 (s, 3 H);  $^{13}\text{C}$  NMR (100 MHz,  $\text{CDCl}_3$ )  $\delta$  158.9, 158.2, 156.6, 156.2, 138.0, 136.6, 131.3, 129.1, 128.9, 127.7, 123.7, 123.1, 114.0, 88.0, 80.0, 55.2, 51.9, 50.3, 44.6, 34.4; HRMS (ESI)  $m/z$  calcd for  $\text{C}_{22}\text{H}_{24}\text{N}_5\text{O}$   $[\text{M}+\text{H}]^+$ : 374.1975; Found: 374.1976.

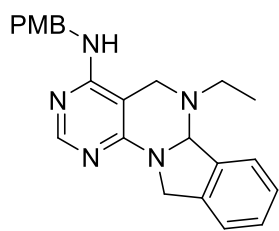

**(5b)** Yield: 40% from **1g**, 23.2 mg; light brown solid; NMR (500 MHz,  $\text{CDCl}_3$ )  $\delta$  8.30 (s, 1 H), 7.45 (d,  $J = 6.8$  Hz, 1 H), 7.35–7.39 (m, 3 H), 7.26–7.30 (m, 3 H), 6.89 (d,  $J = 6.4$  Hz, 2 H), 5.91 (s, 1 H), 4.84 (ABq,  $\Delta\delta_{\text{AB}} = 0.03$ ,  $J_{\text{AB}} = 14.7$  Hz, 2 H), 4.56–4.70 (m, 2 H), 4.27 (brs, 1 H), 4.01 (d,  $J = 15.7$  Hz, 1 H), 3.81 (s, 3 H), 3.71 (d,  $J = 15.7$  Hz, 1 H), 2.15–2.22 (m, 1 H), 1.96–2.04 (m, 1 H), 0.95 (t,  $J = 7.1$  Hz, 3 H);  $^{13}\text{C}$  NMR (100 MHz,  $\text{CDCl}_3$ )  $\delta$  159.0, 158.2, 156.7, 156.6, 138.1, 136.7, 131.4, 129.1, 128.9, 127.7, 123.8, 123.2, 114.1, 88.2, 80.8, 55.3, 51.6, 45.6, 44.7, 39.2, 13.7; HRMS (ESI)  $m/z$  calcd for  $\text{C}_{23}\text{H}_{26}\text{N}_5\text{O}$   $[\text{M}+\text{H}]^+$ : 388.2132; Found: 388.2133.

**Scheme S8.** Synthetic scheme for scaffold V (**6a–6b**) and scaffold III (**7a–7b**).

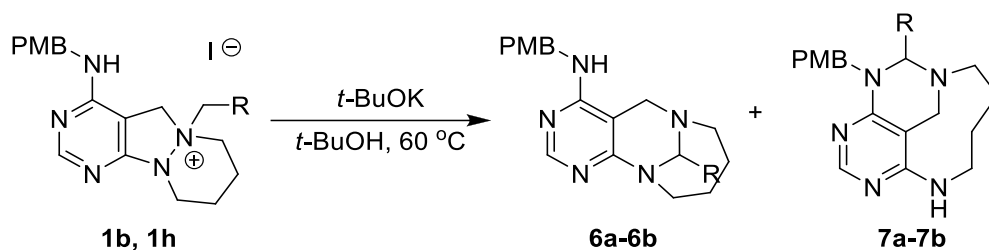

**(6a)** Yield: 67% from **1b**, 50.1 mg; off-white solid;  $^1\text{H}$  NMR (400 MHz,  $\text{MeOH-}d_4$ )  $\delta$  8.03 (s, 1 H), 7.23 (d,  $J = 8.2$  Hz, 2 H), 6.84 (d,  $J = 8.6$  Hz, 2 H), 4.56 (ABq,  $\Delta\delta_{\text{AB}} = 0.02$ ,  $J_{\text{AB}} = 15.1$  Hz, 2 H), 4.41 (dd,  $J = 13.7$ , 2.0 Hz, 1 H), 4.14–4.20 (m, 2 H), 3.99 (d,  $J = 16.0$  Hz, 1 H), 3.74 (s, 3 H), 3.37 (d,  $J = 16.4$  Hz, 1 H), 3.21–3.26 (m, 1 H), 2.92–2.99 (m, 1 H), 2.40–2.45 (m, 1 H), 1.87–1.92 (m, 1 H), 1.68–1.78 (m, 3 H);  $^{13}\text{C}$  NMR (100 MHz,  $\text{CDCl}_3$ )  $\delta$  161.8, 159.3, 156.0, 131.0, 129.2, 114.1, 95.6, 66.2, 56.0, 55.3, 50.9, 49.2, 44.6, 31.5, 26.1; HRMS (ESI)  $m/z$  calcd for  $\text{C}_{18}\text{H}_{24}\text{N}_5\text{O}$   $[\text{M}+\text{H}]^+$ : 326.1975; Found: 326.1977.

**(6b)** Yield: 47% from **1h**, 38.0 mg; colorless oil;  $^1\text{H}$  NMR (500 MHz,  $\text{CDCl}_3$ )  $\delta$  8.32 (s, 1 H), 7.28 (d,  $J = 8.3$  Hz, 2 H), 6.88 (d,  $J = 8.3$  Hz, 2 H), 5.81 (ddd,  $J = 17.1, 10.5, 2.7$  Hz, 1 H), 5.27 (d,  $J = 17.6$  Hz, 1 H), 5.17 (d,  $J = 10.3$  Hz, 1 H), 4.75 (brs, 1 H), 4.58 (d,  $J = 5.4$  Hz, 2 H), 4.42–4.48 (m, 1 H), 4.15 (brs, 1 H), 3.88 (d,  $J = 16.1$  Hz, 1 H), 3.80 (s, 3 H), 3.17–3.24 (m, 2 H), 3.00–3.06 (m, 1 H), 2.58–2.63 (m, 1 H), 1.91–1.94 (m, 2 H), 1.60–1.68 (m, 2 H);  $^{13}\text{C}$  NMR (100 MHz,  $\text{CDCl}_3$ )  $\delta$  160.7, 159.0, 158.6, 156.1, 134.9, 130.9, 129.2, 118.2, 114.0, 95.3, 73.6, 57.1, 55.2, 48.9, 45.6, 44.7, 31.5, 26.1; HRMS (ESI)  $m/z$  calcd for  $\text{C}_{20}\text{H}_{26}\text{N}_5\text{O}$   $[\text{M}+\text{H}]^+$ : 352.2132; Found: 352.2133.

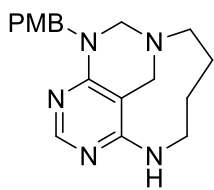

**(7a)** Yield: 10% from **1b**, 7.5 mg; white solid;  $^1\text{H}$  NMR (400 MHz,  $\text{MeOH-}d_4$ )  $\delta$  7.91 (s, 1 H), 7.22 (d,  $J = 8.2$  Hz, 2 H), 6.89 (d,  $J = 8.2$  Hz, 2 H), 4.98 (d,  $J = 14.9$  Hz, 1 H), 4.55 (d,  $J = 11.7$  Hz, 1 H), 4.43 (d,  $J = 15.6$  Hz, 1 H), 4.23 (d,  $J = 15.7$  Hz, 1 H), 3.86 (d,  $J = 11.3$  Hz, 1 H), 3.78 (s, 3 H), 3.62 (dd,  $J = 15.7, 10.2$  Hz, 1 H), 3.52 (d,  $J = 15.3$  Hz, 1 H), 3.42 (dd,  $J = 16.2, 6.8$  Hz, 1 H), 2.71 (t,  $J = 10.2$  Hz, 1 H), 2.23–2.31 (m, 2 H), 1.95–2.02 (m, 1 H), 1.33–1.42 (m, 1 H), 0.98–1.03 (m, 1 H);  $^{13}\text{C}$  NMR (100 MHz,  $\text{CDCl}_3$ )  $\delta$  160.3, 159.4, 158.8, 155.6, 129.9, 128.8, 113.9, 85.8, 68.3, 55.2, 53.5, 47.4, 47.1, 43.5, 32.3, 27.5; HRMS (ESI)  $m/z$  calcd for  $\text{C}_{18}\text{H}_{24}\text{N}_5\text{O}$   $[\text{M}+\text{H}]^+$ : 326.1975; Found: 326.1979.

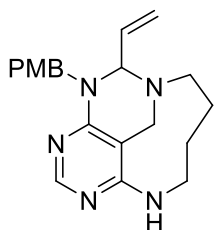

**(7b)** Yield: 33% from **1h**, 26.7 mg; colorless oil;  $^1\text{H}$  NMR (400 MHz,  $\text{MeOH-}d_4$ )  $\delta$  7.94 (s, 1 H), 7.16 (d,  $J = 8.4$  Hz, 2 H), 6.83 (d,  $J = 8.4$  Hz, 2 H), 5.86–5.94 (m, 1 H), 5.61 (d,  $J = 15.2$  Hz, 1 H), 5.43 (d,  $J = 10.4$  Hz, 1 H), 5.28 (d,  $J = 17.2$  Hz, 1 H), 4.28 (d,  $J = 5.2$  Hz, 1 H), 3.96 (d,  $J = 16.4$  Hz, 1 H), 3.90 (d,  $J = 15.2$  Hz, 1 H), 3.75 (s, 3 H), 3.54–3.63 (m, 2 H), 3.39 (dd,  $J = 16.0, 7.2$  Hz, 1 H), 2.50 (dd,  $J = 11.0, 9.4$  Hz, 1 H), 2.17–2.26 (m, 1 H), 2.01 (dd,  $J = 11.2, 9.6$  Hz, 1 H), 1.86–1.94 (m, 1 H), 1.28–1.39 (m, 1 H), 0.87–0.95 (m, 1 H);  $^{13}\text{C}$  NMR (400 MHz,  $\text{MeOH-}d_4$ )  $\delta$  161.5, 161.1, 160.7, 156.2, 156.1, 136.7, 131.3, 130.5, 119.3, 115.1, 87.3, 76.8, 55.9, 55.8, 55.5, 48.0, 47.9, 47.6, 38.6, 33.8, 28.1; HRMS (ESI)  $m/z$  calcd for  $\text{C}_{20}\text{H}_{26}\text{N}_5\text{O}$   $[\text{M}+\text{H}]^+$ : 352.2132; Found: 352.2133.





**Scheme S10.** Synthetic scheme for compound **9**.

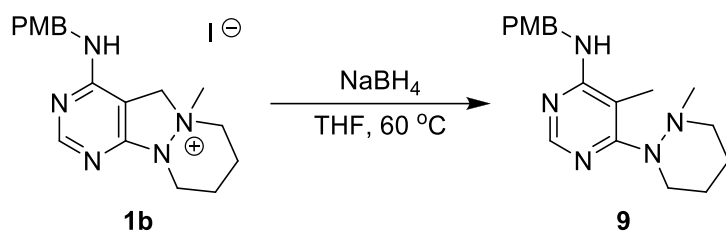

To a solution of **1b** (82.0 mg, 0.18 mmol) in tetrahydrofuran (THF, 1.8 mL, 0.1 M), NaBH<sub>4</sub> (34.2 mg, 0.90 mmol) was added at room temperature. The resulting mixture was stirred at 60 °C. When the completion of the reaction was checked by TLC, the reaction mixture was concentrated under reduced pressure, quenched with deionized water and saturated aq. NaCl, and the organic material was extracted three times with EA and three times with DCM. The combined organic extracts were dried over anhydrous Na<sub>2</sub>SO<sub>4</sub>(s) and filtered. The solvent was evaporated under reduced pressure, and the residue was purified by silica gel flash column chromatography to obtain the desired compound **9**.

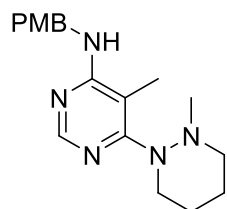

**(9)** Yield: 64%, 37.9 mg; white solid; <sup>1</sup>H NMR (500 MHz, CDCl<sub>3</sub>) δ 8.24 (s, 1 H), 7.29 (d, *J* = 8.3 Hz, 2 H), 6.88 (d, *J* = 8.3 Hz, 2 H), 4.60 (s, 3 H), 3.80 (s, 3 H), 3.55 (brs, 2 H), 2.96 (brs, 2 H), 2.53 (s, 3 H), 1.97 (s, 3 H), 1.78–1.80 (m, 2 H), 1.63 (brs, 2 H); <sup>13</sup>C NMR (100 MHz, CDCl<sub>3</sub>) δ 162.4, 161.6, 158.9, 154.0, 131.6, 129.1, 114.0, 98.6, 55.3, 55.2, 52.3, 45.1, 37.0, 36.7, 24.0, 16.9, 12.1; HRMS (ESI) *m/z* calcd for C<sub>18</sub>H<sub>26</sub>N<sub>5</sub>O [M+H]<sup>+</sup>: 328.2132; Found: 328.2131.

**Scheme S11.** Synthetic scheme for scaffold VII (**10a–10b**).

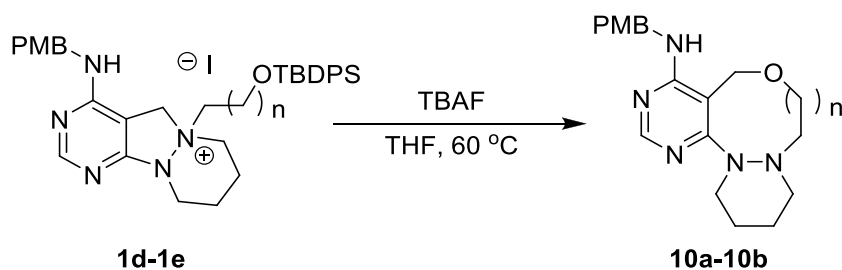

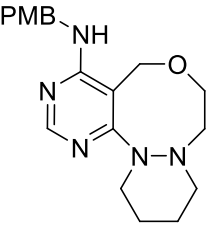 (**10a**) Yield: 78% from **1d**, 61.0 mg; light brown oil; <sup>1</sup>H NMR (500 MHz, CDCl<sub>3</sub>) δ 8.16 (s, 1 H), 7.25 (d, *J* = 8.8 Hz, 3 H), 6.86 (d, *J* = 6.8 Hz, 2 H), 5.12 (brs, 2 H), 4.83 (s, 1 H), 4.55 (s, 2 H), 3.80 (s, 3 H), 3.56 (s, 2 H), 3.19 (brs, 2 H), 3.04 (s, 2 H), 1.79 (s, 2 H), 1.58 (s, 2 H); <sup>13</sup>C NMR (100 MHz, CDCl<sub>3</sub>) δ 161.7, 161.3, 158.8, 155.9, 131.3, 129.1, 113.9, 92.8, 64.3, 63.6, 55.3, 53.3, 52.7, 45.3, 37.0, 24.7, 18.8; HRMS (ESI) *m/z* calcd for C<sub>19</sub>H<sub>26</sub>N<sub>5</sub>O<sub>2</sub> [M+H]<sup>+</sup>: 356.2081; Found: 356.2083.

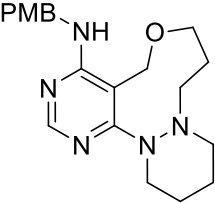 (**10b**) Yield: 44% from **1e**, 35.8 mg; light brown oil; <sup>1</sup>H NMR (500 MHz, CDCl<sub>3</sub>) δ 8.18 (s, 1 H), 7.25 (d, *J* = 9.8 Hz, 2 H), 6.86 (d, *J* = 8.8 Hz, 2 H), 5.48 (d, *J* = 12.2 Hz, 1 H), 5.17 (brs, 1 H), 4.51–4.65 (m, 3 H), 4.42 (d, *J* = 12.2 Hz, 1 H), 3.79 (s, 3 H), 3.72–3.77 (m, 1 H), 3.58–3.62 (m, 1 H), 2.96–3.10 (m, 3 H), 2.82–2.88 (m, 2 H), 1.67–1.89 (m, 5 H), 1.39 (d, *J* = 12.7 Hz, 1 H); <sup>13</sup>C NMR (100 MHz, CDCl<sub>3</sub>) δ 162.7, 160.9, 158.7, 156.0, 131.6, 128.8, 113.9, 94.1, 69.6, 65.3, 55.2, 51.0, 50.9, 44.9, 37.5, 30.7, 23.9, 17.9; HRMS (ESI) *m/z* calcd for C<sub>20</sub>H<sub>28</sub>N<sub>5</sub>O<sub>2</sub> [M+H]<sup>+</sup>: 370.2238; Found: 370.2239.

### III. Optimization of N–N bond cleavage reaction conditions

**Table S1.** Optimization table of N–N bond cleavage reaction.

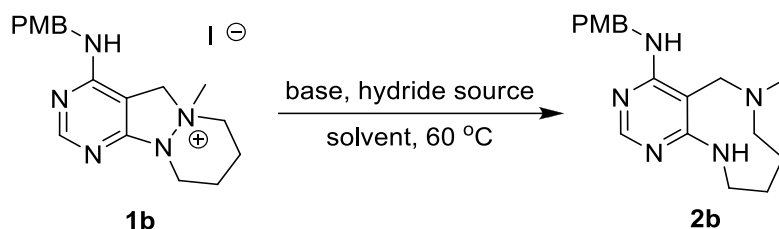

| entry | base (equiv.)                         | hydride source (equiv.)       | solvent        | yield (%) <sup>a</sup> |
|-------|---------------------------------------|-------------------------------|----------------|------------------------|
| 1     | NaOMe (5.0)                           | NaBH <sub>4</sub> (20.0)      | MeOH           | 38                     |
| 2     | NaOEt (5.0)                           | NaBH <sub>4</sub> (20.0)      | EtOH           | 51                     |
| 3     | <i>t</i> -BuOK (5.0)                  | NaBH <sub>4</sub> (20.0)      | <i>t</i> -BuOH | - <sup>b</sup>         |
| 4     | Na <sub>2</sub> CO <sub>3</sub> (5.0) | NaBH <sub>4</sub> (20.0)      | MeOH           | 0                      |
| 5     | TEA (5.0)                             | NaBH <sub>4</sub> (20.0)      | MeOH           | 0                      |
| 6     | DBU (5.0)                             | NaBH <sub>4</sub> (20.0)      | MeOH           | 0                      |
| 7     | NaOMe (5.0)                           | NaBH(OAc) <sub>3</sub> (20.0) | MeOH           | 0                      |
| 8     | NaOMe (5.0)                           | NaBH <sub>3</sub> CN (20.0)   | MeOH           | - <sup>b</sup>         |
| 9     | NaOEt (1.5)                           | NaBH <sub>4</sub> (20.0)      | EtOH           | 87                     |
| 10    | NaOEt (1.5)                           | NaBH <sub>4</sub> (10.0)      | EtOH           | 84                     |
| 11    | NaOEt (1.5)                           | NaBH <sub>4</sub> (6.0)       | EtOH           | - <sup>b</sup>         |
| 12    | NaOEt (1.5)                           | NaBH <sub>4</sub> (3.0)       | EtOH           | - <sup>b</sup>         |
| 13    | NaOEt (5.0)                           | -                             | EtOH           | 0                      |

<sup>a</sup> isolated yields. <sup>b</sup> messy reaction pattern.

#### IV. A proposed mechanism of N–N bond cleavage reaction

**Scheme S12.** Mechanism study to elucidate the N–N bond cleavage reaction.

(a) The expected result of the deuterium-labeling experiment

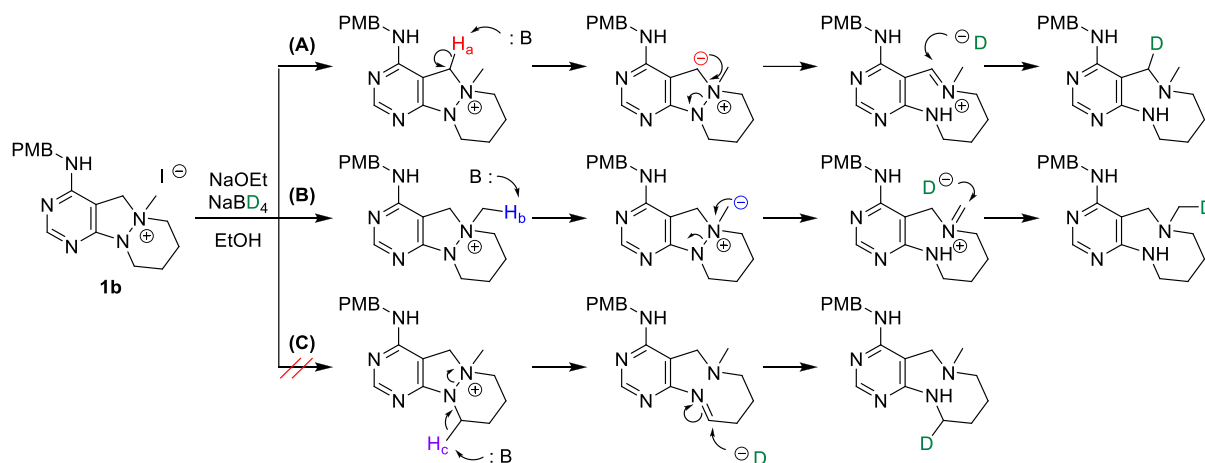

(b) Introduction of cyanide instead of a hydride source

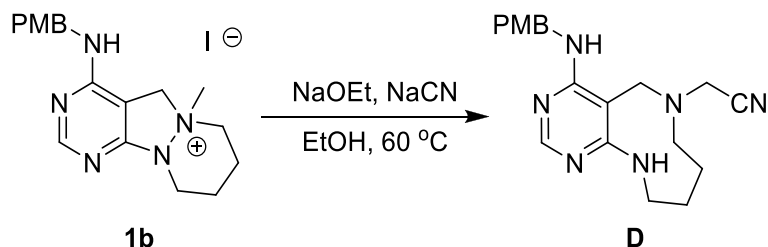

To understand the reaction mechanism of N–N bond cleavage reaction, we performed the deuterium-labeling experiment using NaBD<sub>4</sub> (Scheme S12a). Synthetic procedure was identical to Scheme S4 (NaBD<sub>4</sub> was used instead of NaBH<sub>4</sub>). As shown in Figure S1, the decrease of the number of protons and <sup>2</sup>H-isotope shift supported the deuterium incorporation in H<sub>a</sub> (~16% D incorporation) and H<sub>b</sub> (~54% D incorporation), and not in H<sub>c</sub>. Consequently, the N–N bond cleavage reaction proceeds through both the proposed mechanism (B) (major mechanism) and (A) (minor mechanism), and Hofmann elimination (mechanism (C)) doesn't

occur. Furthermore, we conducted an experiment for the introduction of another nucleophile, cyanide (Scheme S12b). Synthetic procedure was identical to Scheme S4 (NaCN was used instead of NaBH<sub>4</sub>). Generation of cyanide-added product **D** as a major product also supported that the N–N bond cleavage reaction mainly proceeds through the proposed mechanism (B).

**Figure S1.** <sup>1</sup>H NMR spectra of the deuterium-labeling experiment.

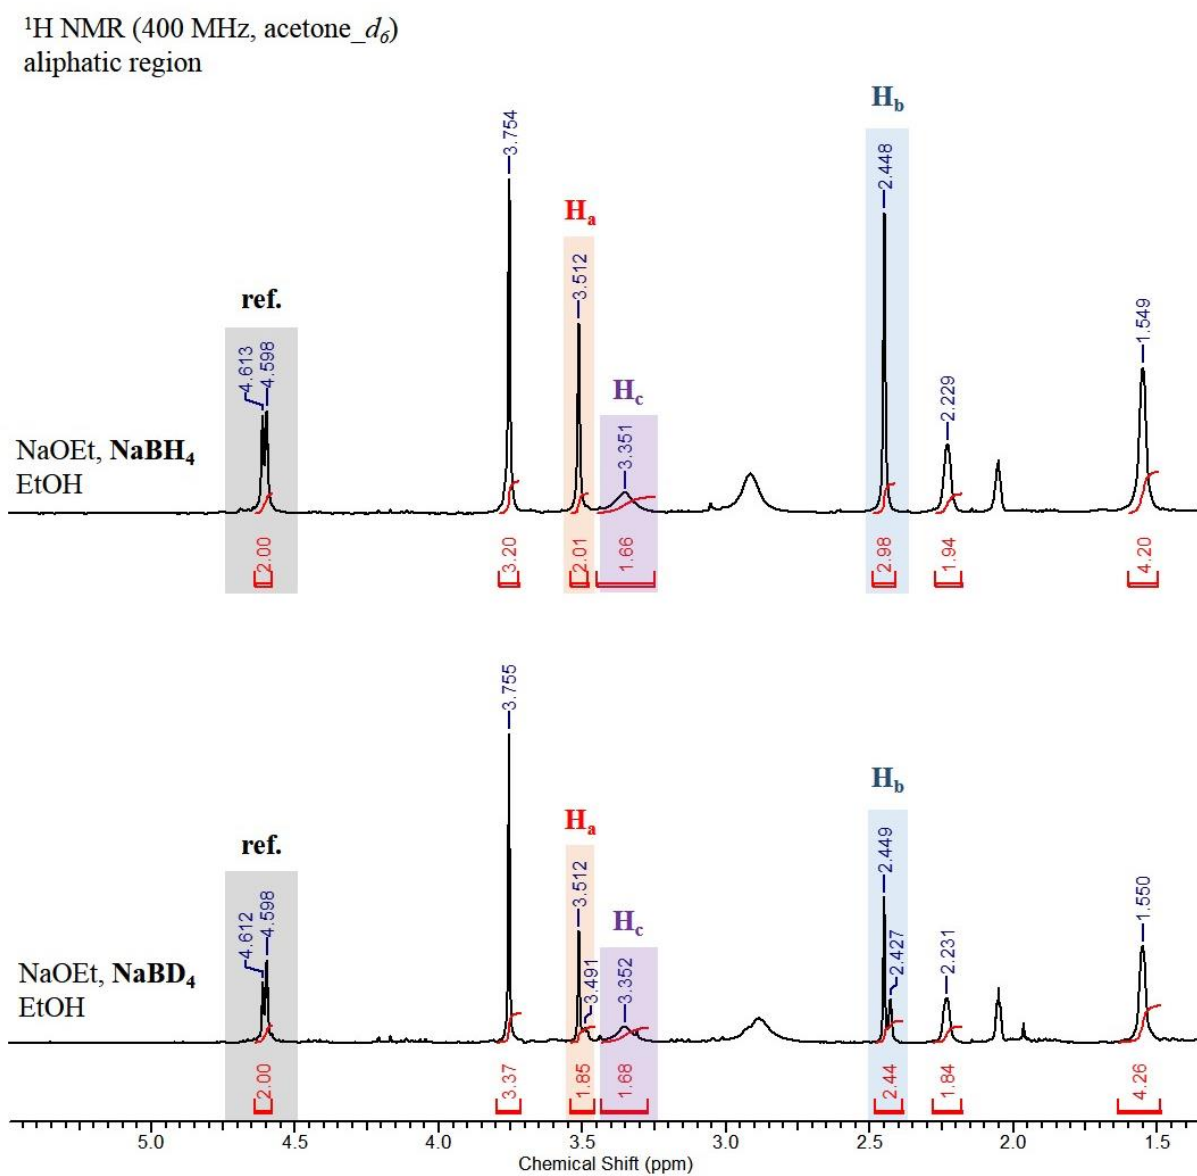

## V. Chemoinformatic analysis

**Figure S2.** Bioactive benzannulated medium-sized rings used in PMI analysis.<sup>[3]</sup>

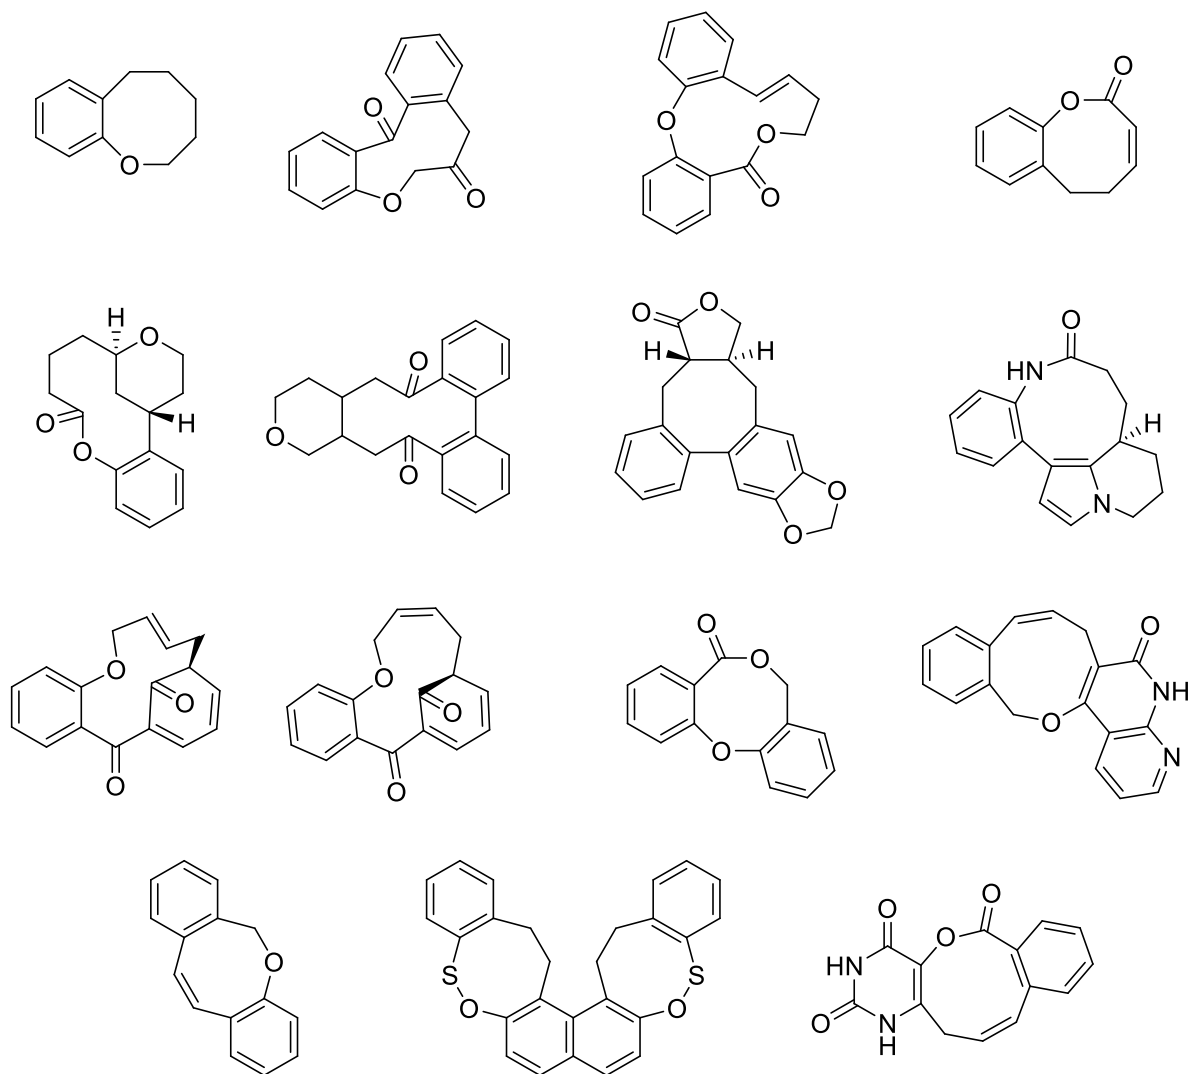

**Figure S3.** Tanimoto similarity matrix for synthesized 14 core scaffolds.

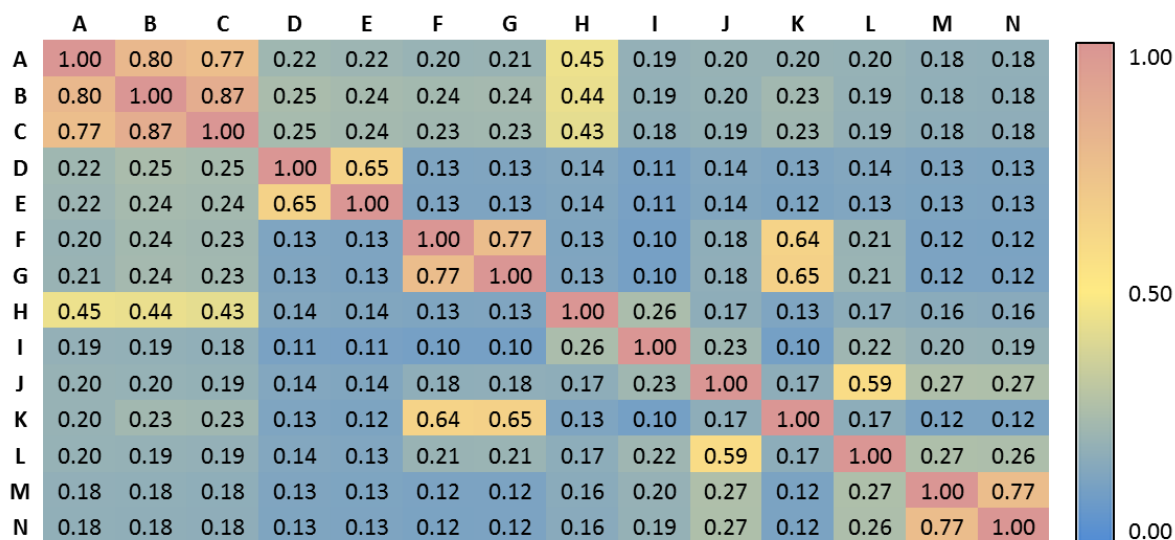

Tanimoto similarity matrix for our resulting 14 core scaffolds (A–N) indicates a good level of structural diversity (average is 0.24). Tanimoto similarity coefficients were calculated using Discovery Studio [Accelrys] based on ECFP<sub>6</sub> (extended-connectivity fingerprint) molecular fingerprints. Heat map was generated in Excel [Microsoft] using a three-color scale set to 0.00(blue), 0.50 (yellow), and 1.00 (red). 1.00 represents 100% similarity and 0.00 indicates 0% similarity.



## VI. X-ray crystallographic analysis data for 2a and 7a

**Figure S3.** X-ray crystal structure of **2a**. Deposition number in Cambridge Structural Database: CCDC 1866158.

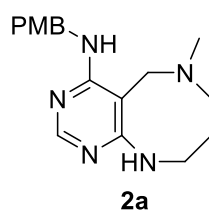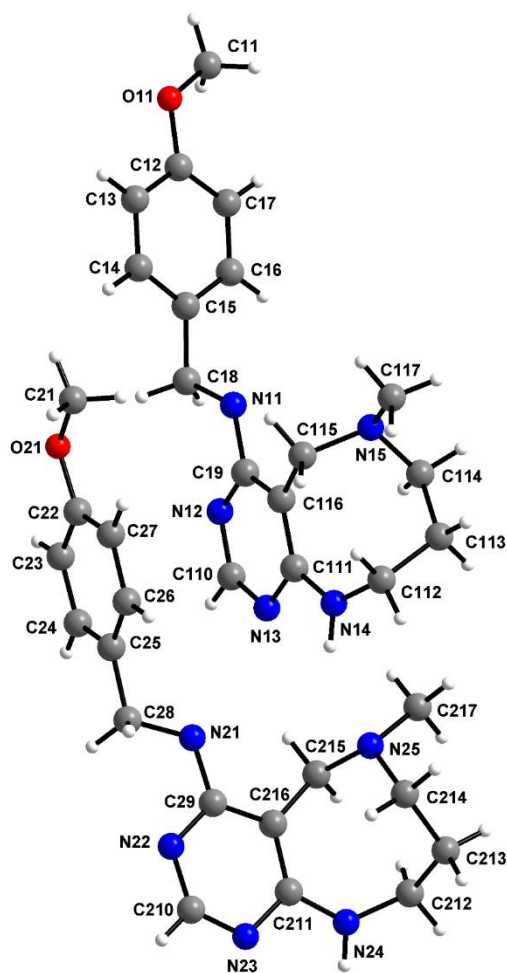

**Table S2.** Crystal data and structure refinement for **2a**.

|                                            |                                                                                                                                                                       |
|--------------------------------------------|-----------------------------------------------------------------------------------------------------------------------------------------------------------------------|
| <b>Chemical formula</b>                    | C <sub>17</sub> H <sub>22</sub> N <sub>5</sub> O                                                                                                                      |
| <b>Formula weight</b>                      | 312.39                                                                                                                                                                |
| <b>Temperature</b>                         | 296(2) K                                                                                                                                                              |
| <b>Wavelength</b>                          | 0.71073 Å                                                                                                                                                             |
| <b>Crystal size</b>                        | 0.100 x 0.150 x 0.160 mm                                                                                                                                              |
| <b>Crystal habit</b>                       | colorless block                                                                                                                                                       |
| <b>Crystal system</b>                      | triclinic                                                                                                                                                             |
| <b>Space group</b>                         | P -1                                                                                                                                                                  |
| <b>Unit cell dimensions</b>                | a = 9.7756(12) Å      α = 84.4412(12)°<br>b = 12.9665(16) Å    β = 86.9004(12)°<br>c = 12.9912(16) Å    γ = 84.1930(12)°                                              |
| <b>Volume</b>                              | 1628.9(3) Å <sup>3</sup>                                                                                                                                              |
| <b>Z</b>                                   | 4                                                                                                                                                                     |
| <b>Density (calculated)</b>                | 1.274 g/cm <sup>3</sup>                                                                                                                                               |
| <b>Absorption coefficient</b>              | 0.083 mm <sup>-1</sup>                                                                                                                                                |
| <b>F(000)</b>                              | 668                                                                                                                                                                   |
| <b>Theta range for data collection</b>     | 2.83 to 28.68°                                                                                                                                                        |
| <b>Index ranges</b>                        | -13 ≤ h ≤ 13, -17 ≤ k ≤ 17, -17 ≤ l ≤ 17                                                                                                                              |
| <b>Reflections collected</b>               | 50448                                                                                                                                                                 |
| <b>Independent reflections</b>             | 8325 [R(int) = 0.0701]                                                                                                                                                |
| <b>Coverage of independent reflections</b> | 99.0%                                                                                                                                                                 |
| <b>Absorption correction</b>               | multi-scan                                                                                                                                                            |
| <b>Max. and min. transmission</b>          | 0.9920 and 0.9870                                                                                                                                                     |
| <b>Refinement method</b>                   | Full-matrix least-squares on F <sup>2</sup>                                                                                                                           |
| <b>Refinement program</b>                  | SHELXL-2013 (Sheldrick, 2013)                                                                                                                                         |
| <b>Function minimized</b>                  | Σ w(F <sub>o</sub> <sup>2</sup> - F <sub>c</sub> <sup>2</sup> ) <sup>2</sup>                                                                                          |
| <b>Data / restraints / parameters</b>      | 8325 / 0 / 419                                                                                                                                                        |
| <b>Goodness-of-fit on F<sup>2</sup></b>    | 1.014                                                                                                                                                                 |
| <b>Final R indices</b>                     | 4482 data; I > 2σ(I)    R1 = 0.0657, wR2 = 0.1432<br>all data                    R1 = 0.1345, wR2 = 0.1765                                                            |
| <b>Weighting scheme</b>                    | w = 1/[σ <sup>2</sup> (F <sub>o</sub> <sup>2</sup> ) + (0.0665P) <sup>2</sup> + 0.5658P]<br>where P = (F <sub>o</sub> <sup>2</sup> + 2F <sub>c</sub> <sup>2</sup> )/3 |
| <b>Largest diff. peak and hole</b>         | 0.519 and -0.208 eÅ <sup>-3</sup>                                                                                                                                     |
| <b>R.M.S. deviation from mean</b>          | 0.041 eÅ <sup>-3</sup>                                                                                                                                                |

**Table S3.** Atomic coordinates and equivalent isotropic atomic displacement parameters ( $\text{\AA}^2$ ) for **2a**.  $U(\text{eq})$  is defined as one-third of the trace of the orthogonalized  $U_{ij}$  tensor.

|      | <b>x/a</b> | <b>y/b</b>  | <b>z/c</b>  | <b>U(eq)</b> |
|------|------------|-------------|-------------|--------------|
| C11  | 0.4823(4)  | 0.6103(3)   | 0.5736(3)   | 0.0954(12)   |
| C12  | 0.4407(2)  | 0.75548(18) | 0.6738(2)   | 0.0490(6)    |
| C13  | 0.4462(3)  | 0.7922(2)   | 0.7689(2)   | 0.0580(7)    |
| C14  | 0.4231(3)  | 0.8972(2)   | 0.7780(2)   | 0.0608(7)    |
| C15  | 0.3928(2)  | 0.96839(19) | 0.6939(2)   | 0.0546(7)    |
| C16  | 0.3844(3)  | 0.9290(2)   | 0.5999(2)   | 0.0618(7)    |
| C17  | 0.4083(3)  | 0.8232(2)   | 0.5889(2)   | 0.0587(7)    |
| C18  | 0.3760(3)  | 0.0835(2)   | 0.7037(3)   | 0.0773(10)   |
| C19  | 0.1981(2)  | 0.22857(17) | 0.72046(18) | 0.0432(5)    |
| C110 | 0.2648(3)  | 0.39021(19) | 0.6897(2)   | 0.0590(7)    |
| C111 | 0.0408(2)  | 0.37857(16) | 0.74127(17) | 0.0395(5)    |
| C112 | 0.7794(3)  | 0.40200(19) | 0.7691(2)   | 0.0538(6)    |
| C113 | 0.7311(3)  | 0.3490(2)   | 0.6796(2)   | 0.0602(7)    |
| C114 | 0.8227(3)  | 0.25377(19) | 0.64569(19) | 0.0524(6)    |
| C115 | 0.9596(2)  | 0.20027(16) | 0.79891(17) | 0.0419(5)    |
| C116 | 0.0654(2)  | 0.26971(15) | 0.75264(16) | 0.0367(5)    |
| C117 | 0.7522(3)  | 0.1209(2)   | 0.7770(3)   | 0.0735(9)    |
| C21  | 0.3167(4)  | 0.0728(2)   | 0.0190(3)   | 0.0862(10)   |
| C22  | 0.3526(2)  | 0.24969(17) | 0.97191(18) | 0.0454(6)    |
| C23  | 0.4411(3)  | 0.3211(2)   | 0.9311(2)   | 0.0619(7)    |
| C24  | 0.3995(3)  | 0.4260(2)   | 0.9254(2)   | 0.0608(7)    |
| C25  | 0.2696(3)  | 0.46287(18) | 0.96117(18) | 0.0459(6)    |
| C26  | 0.1841(3)  | 0.3901(2)   | 0.0027(2)   | 0.0581(7)    |
| C27  | 0.2233(3)  | 0.2844(2)   | 0.0077(2)   | 0.0567(7)    |
| C28  | 0.2253(3)  | 0.57730(18) | 0.9593(2)   | 0.0557(7)    |
| C29  | 0.1262(2)  | 0.72353(15) | 0.84561(16) | 0.0344(5)    |
| C210 | 0.1052(3)  | 0.88027(17) | 0.9104(2)   | 0.0484(6)    |
| C211 | 0.0337(2)  | 0.87712(16) | 0.74693(17) | 0.0390(5)    |
| C212 | 0.9058(3)  | 0.90628(18) | 0.5790(2)   | 0.0530(6)    |
| C213 | 0.7848(3)  | 0.84106(19) | 0.6042(2)   | 0.0576(7)    |
| C214 | 0.8090(2)  | 0.74317(17) | 0.67985(19) | 0.0451(6)    |
| C215 | 0.0626(2)  | 0.70652(16) | 0.66215(16) | 0.0365(5)    |
| C216 | 0.0736(2)  | 0.77028(15) | 0.75125(16) | 0.0330(4)    |
| C217 | 0.9147(3)  | 0.6213(2)   | 0.56087(19) | 0.0572(7)    |

|     | <b>x/a</b>  | <b>y/b</b>  | <b>z/c</b>  | <b>U(eq)</b> |
|-----|-------------|-------------|-------------|--------------|
| N11 | 0.2320(2)   | 0.12331(14) | 0.72103(18) | 0.0545(6)    |
| N12 | 0.2998(2)   | 0.28929(15) | 0.68792(18) | 0.0562(6)    |
| N13 | 0.1440(2)   | 0.44037(14) | 0.71250(17) | 0.0514(5)    |
| N14 | 0.9177(2)   | 0.43509(14) | 0.75661(16) | 0.0494(5)    |
| N15 | 0.86701(19) | 0.17037(14) | 0.72315(15) | 0.0454(5)    |
| N21 | 0.16566(19) | 0.61962(13) | 0.86095(14) | 0.0413(4)    |
| N22 | 0.1410(2)   | 0.77899(14) | 0.92746(14) | 0.0427(5)    |
| N23 | 0.0537(2)   | 0.93434(13) | 0.82782(16) | 0.0473(5)    |
| N24 | 0.9720(2)   | 0.93695(14) | 0.66709(16) | 0.0499(5)    |
| N25 | 0.92598(18) | 0.66735(13) | 0.65852(13) | 0.0376(4)    |
| O11 | 0.4711(2)   | 0.64915(14) | 0.67059(17) | 0.0725(6)    |
| O21 | 0.4040(2)   | 0.14683(13) | 0.97493(15) | 0.0660(5)    |

**Table S4.** Bond lengths (Å) for **2a**.

|           |          |           |          |
|-----------|----------|-----------|----------|
| C11-O11   | 1.397(4) | C11-H11A  | 0.96     |
| C11-H11B  | 0.96     | C11-H11C  | 0.96     |
| C12-C17   | 1.372(4) | C12-C13   | 1.372(4) |
| C12-O11   | 1.385(3) | C13-C14   | 1.373(4) |
| C13-H13   | 0.93     | C14-C15   | 1.385(4) |
| C14-H14   | 0.93     | C15-C16   | 1.377(4) |
| C15-C18   | 1.502(3) | C16-C17   | 1.388(4) |
| C16-H16   | 0.93     | C17-H17   | 0.93     |
| C18-N11   | 1.463(3) | C18-H18A  | 0.97     |
| C18-H18B  | 0.97     | C19-N12   | 1.355(3) |
| C19-N11   | 1.371(3) | C19-C116  | 1.409(3) |
| C110-N12  | 1.321(3) | C110-N13  | 1.323(3) |
| C110-H110 | 0.93     | C111-N14  | 1.359(3) |
| C111-N13  | 1.365(3) | C111-C116 | 1.403(3) |
| C112-N14  | 1.455(3) | C112-C113 | 1.525(4) |
| C112-H11D | 0.97     | C112-H11E | 0.97     |
| C113-C114 | 1.536(4) | C113-H11F | 0.97     |
| C113-H11G | 0.97     | C114-N15  | 1.453(3) |
| C114-H11H | 0.97     | C114-H11I | 0.97     |
| C115-N15  | 1.476(3) | C115-C116 | 1.502(3) |
| C115-H11J | 0.97     | C115-H11K | 0.97     |
| C117-N15  | 1.461(3) | C117-H11L | 0.96     |
| C117-H11M | 0.96     | C117-H11N | 0.96     |
| C21-O21   | 1.409(3) | C21-H21A  | 0.96     |
| C21-H21B  | 0.96     | C21-H21C  | 0.96     |
| C22-C27   | 1.371(3) | C22-O21   | 1.374(3) |
| C22-C23   | 1.380(3) | C23-C24   | 1.376(3) |
| C23-H23   | 0.93     | C24-C25   | 1.383(3) |
| C24-H24   | 0.93     | C25-C26   | 1.376(3) |
| C25-C28   | 1.501(3) | C26-C27   | 1.382(3) |
| C26-H26   | 0.93     | C27-H27   | 0.93     |
| C28-N21   | 1.468(3) | C28-H28A  | 0.97     |
| C28-H28B  | 0.97     | C29-N22   | 1.362(3) |
| C29-N21   | 1.362(2) | C29-C216  | 1.413(3) |
| C210-N23  | 1.318(3) | C210-N22  | 1.325(3) |
| C210-H210 | 0.93     | C211-N24  | 1.363(3) |
| C211-N23  | 1.377(3) | C211-C216 | 1.397(3) |

---

|           |          |           |          |
|-----------|----------|-----------|----------|
| C212-N24  | 1.452(3) | C212-C213 | 1.526(3) |
| C212-H21D | 0.97     | C212-H21E | 0.97     |
| C213-C214 | 1.535(3) | C213-H21F | 0.97     |
| C213-H21G | 0.97     | C214-N25  | 1.464(3) |
| C214-H21H | 0.97     | C214-H21I | 0.97     |
| C215-N25  | 1.480(3) | C215-C216 | 1.501(3) |
| C215-H21J | 0.97     | C215-H21K | 0.97     |
| C217-N25  | 1.467(3) | C217-H21L | 0.96     |
| C217-H21M | 0.96     | C217-H21N | 0.96     |
| N14-H14A  | 0.86     | N24-H24A  | 0.86     |

---

**Table S5.** Bond angles (°) for **2a**.

|                |            |                |            |
|----------------|------------|----------------|------------|
| O11-C11-H11A   | 109.5      | O11-C11-H11B   | 109.5      |
| H11A-C11-H11B  | 109.5      | O11-C11-H11C   | 109.5      |
| H11A-C11-H11C  | 109.5      | H11B-C11-H11C  | 109.5      |
| C17-C12-C13    | 120.0(2)   | C17-C12-O11    | 124.0(2)   |
| C13-C12-O11    | 116.0(2)   | C12-C13-C14    | 119.7(3)   |
| C12-C13-H13    | 120.2      | C14-C13-H13    | 120.2      |
| C13-C14-C15    | 122.1(3)   | C13-C14-H14    | 118.9      |
| C15-C14-H14    | 118.9      | C16-C15-C14    | 116.9(2)   |
| C16-C15-C18    | 121.5(3)   | C14-C15-C18    | 121.5(3)   |
| C15-C16-C17    | 121.9(3)   | C15-C16-H16    | 119.0      |
| C17-C16-H16    | 119.0      | C12-C17-C16    | 119.3(3)   |
| C12-C17-H17    | 120.3      | C16-C17-H17    | 120.3      |
| N11-C18-C15    | 112.4(2)   | N11-C18-H18A   | 109.1      |
| C15-C18-H18A   | 109.1      | N11-C18-H18B   | 109.1      |
| C15-C18-H18B   | 109.1      | H18A-C18-H18B  | 107.9      |
| N12-C19-N11    | 115.8(2)   | N12-C19-C116   | 122.8(2)   |
| N11-C19-C116   | 121.4(2)   | N12-C110-N13   | 129.6(2)   |
| N12-C110-H110  | 115.2      | N13-C110-H110  | 115.2      |
| N14-C111-N13   | 112.14(19) | N14-C111-C116  | 126.3(2)   |
| N13-C111-C116  | 121.6(2)   | N14-C112-C113  | 116.1(2)   |
| N14-C112-H11D  | 108.3      | C113-C112-H11D | 108.3      |
| N14-C112-H11E  | 108.3      | C113-C112-H11E | 108.3      |
| H11D-C112-H11E | 107.4      | C112-C113-C114 | 116.9(2)   |
| C112-C113-H11F | 108.1      | C114-C113-H11F | 108.1      |
| C112-C113-H11G | 108.1      | C114-C113-H11G | 108.1      |
| H11F-C113-H11G | 107.3      | N15-C114-C113  | 119.3(2)   |
| N15-C114-H11H  | 107.5      | C113-C114-H11H | 107.5      |
| N15-C114-H11I  | 107.5      | C113-C114-H11I | 107.5      |
| H11H-C114-H11I | 107.0      | N15-C115-C116  | 114.08(18) |
| N15-C115-H11J  | 108.7      | C116-C115-H11J | 108.7      |
| N15-C115-H11K  | 108.7      | C116-C115-H11K | 108.7      |
| H11J-C115-H11K | 107.6      | C111-C116-C19  | 115.8(2)   |
| C111-C116-C115 | 122.80(19) | C19-C116-C115  | 121.41(19) |
| N15-C117-H11L  | 109.5      | N15-C117-H11M  | 109.5      |
| H11L-C117-H11M | 109.5      | N15-C117-H11N  | 109.5      |
| H11L-C117-H11N | 109.5      | H11M-C117-H11N | 109.5      |

|                |            |                |            |
|----------------|------------|----------------|------------|
| O21-C21-H21A   | 109.5      | O21-C21-H21B   | 109.5      |
| H21A-C21-H21B  | 109.5      | O21-C21-H21C   | 109.5      |
| H21A-C21-H21C  | 109.5      | H21B-C21-H21C  | 109.5      |
| C27-C22-O21    | 124.7(2)   | C27-C22-C23    | 119.4(2)   |
| O21-C22-C23    | 116.0(2)   | C24-C23-C22    | 120.3(2)   |
| C24-C23-H23    | 119.9      | C22-C23-H23    | 119.9      |
| C23-C24-C25    | 121.4(2)   | C23-C24-H24    | 119.3      |
| C25-C24-H24    | 119.3      | C26-C25-C24    | 117.1(2)   |
| C26-C25-C28    | 121.1(2)   | C24-C25-C28    | 121.7(2)   |
| C25-C26-C27    | 122.4(2)   | C25-C26-H26    | 118.8      |
| C27-C26-H26    | 118.8      | C22-C27-C26    | 119.5(2)   |
| C22-C27-H27    | 120.3      | C26-C27-H27    | 120.3      |
| N21-C28-C25    | 112.18(19) | N21-C28-H28A   | 109.2      |
| C25-C28-H28A   | 109.2      | N21-C28-H28B   | 109.2      |
| C25-C28-H28B   | 109.2      | H28A-C28-H28B  | 107.9      |
| N22-C29-N21    | 115.35(19) | N22-C29-C216   | 122.46(18) |
| N21-C29-C216   | 122.19(18) | N23-C210-N22   | 129.8(2)   |
| N23-C210-H210  | 115.1      | N22-C210-H210  | 115.1      |
| N24-C211-N23   | 112.00(19) | N24-C211-C216  | 126.5(2)   |
| N23-C211-C216  | 121.5(2)   | N24-C212-C213  | 116.0(2)   |
| N24-C212-H21D  | 108.3      | C213-C212-H21D | 108.3      |
| N24-C212-H21E  | 108.3      | C213-C212-H21E | 108.3      |
| H21D-C212-H21E | 107.4      | C212-C213-C214 | 117.1(2)   |
| C212-C213-H21F | 108.0      | C214-C213-H21F | 108.0      |
| C212-C213-H21G | 108.0      | C214-C213-H21G | 108.0      |
| H21F-C213-H21G | 107.3      | N25-C214-C213  | 118.5(2)   |
| N25-C214-H21H  | 107.7      | C213-C214-H21H | 107.7      |
| N25-C214-H21I  | 107.7      | C213-C214-H21I | 107.7      |
| H21H-C214-H21I | 107.1      | N25-C215-C216  | 113.34(17) |
| N25-C215-H21J  | 108.9      | C216-C215-H21J | 108.9      |
| N25-C215-H21K  | 108.9      | C216-C215-H21K | 108.9      |
| H21J-C215-H21K | 107.7      | C211-C216-C29  | 116.24(18) |
| C211-C216-C215 | 123.16(19) | C29-C216-C215  | 120.60(18) |
| N25-C217-H21L  | 109.5      | N25-C217-H21M  | 109.5      |
| H21L-C217-H21M | 109.5      | N25-C217-H21N  | 109.5      |
| H21L-C217-H21N | 109.5      | H21M-C217-H21N | 109.5      |
| C19-N11-C18    | 119.4(2)   | C110-N12-C19   | 114.5(2)   |
| C110-N13-C111  | 115.28(19) | C111-N14-C112  | 130.09(19) |



---

|               |            |               |            |
|---------------|------------|---------------|------------|
| C111-N14-H14A | 115.0      | C112-N14-H14A | 115.0      |
| C114-N15-C117 | 112.9(2)   | C114-N15-C115 | 114.47(17) |
| C117-N15-C115 | 110.0(2)   | C29-N21-C28   | 119.15(18) |
| C210-N22-C29  | 114.53(19) | C210-N23-C211 | 115.28(18) |
| C211-N24-C212 | 129.92(19) | C211-N24-H24A | 115.0      |
| C212-N24-H24A | 115.0      | C214-N25-C217 | 112.27(18) |
| C214-N25-C215 | 114.70(16) | C217-N25-C215 | 110.31(17) |
| C12-O11-C11   | 117.7(2)   | C22-O21-C21   | 116.9(2)   |

---

**Table S6.** Anisotropic atomic displacement parameters ( $\text{\AA}^2$ ) for **2a**. The anisotropic atomic displacement factor exponent takes the form:  $-2\pi^2[h^2 a^{*2} U_{11} + \dots + 2 h k a^* b^* U_{12}]$ .

|      | $U_{11}$   | $U_{22}$   | $U_{33}$   | $U_{23}$    | $U_{13}$    | $U_{12}$    |
|------|------------|------------|------------|-------------|-------------|-------------|
| C11  | 0.097(3)   | 0.072(2)   | 0.123(3)   | -0.047(2)   | 0.000(2)    | -0.0039(19) |
| C12  | 0.0339(12) | 0.0448(13) | 0.0677(17) | -0.0055(12) | -0.0006(11) | -0.0011(10) |
| C13  | 0.0547(16) | 0.0623(17) | 0.0532(16) | 0.0009(13)  | 0.0022(12)  | 0.0042(13)  |
| C14  | 0.0505(16) | 0.0692(18) | 0.0638(18) | -0.0236(15) | 0.0024(13)  | 0.0028(13)  |
| C15  | 0.0330(13) | 0.0463(14) | 0.084(2)   | -0.0115(14) | -0.0041(12) | 0.0061(11)  |
| C16  | 0.0520(16) | 0.0586(17) | 0.0722(19) | 0.0061(14)  | -0.0192(14) | 0.0046(13)  |
| C17  | 0.0543(16) | 0.0615(17) | 0.0629(17) | -0.0151(14) | -0.0156(13) | -0.0021(13) |
| C18  | 0.0412(15) | 0.0500(16) | 0.142(3)   | -0.0240(17) | -0.0022(17) | 0.0053(12)  |
| C19  | 0.0420(13) | 0.0381(12) | 0.0512(14) | -0.0086(10) | -0.0084(11) | -0.0041(10) |
| C110 | 0.0508(16) | 0.0429(14) | 0.086(2)   | -0.0065(13) | 0.0002(14)  | -0.0174(12) |
| C111 | 0.0455(13) | 0.0330(11) | 0.0409(12) | -0.0067(9)  | -0.0045(10) | -0.0039(10) |
| C112 | 0.0483(15) | 0.0426(13) | 0.0681(17) | -0.0075(12) | 0.0048(12)  | 0.0049(11)  |
| C113 | 0.0544(16) | 0.0535(15) | 0.0717(18) | 0.0022(13)  | -0.0147(14) | -0.0016(13) |
| C114 | 0.0503(15) | 0.0610(16) | 0.0493(14) | -0.0110(12) | -0.0067(12) | -0.0138(12) |
| C115 | 0.0465(13) | 0.0338(11) | 0.0435(13) | -0.0017(10) | 0.0036(10)  | 0.0004(10)  |
| C116 | 0.0410(12) | 0.0327(11) | 0.0370(12) | -0.0056(9)  | -0.0039(9)  | -0.0031(9)  |
| C117 | 0.0522(17) | 0.0552(16) | 0.112(3)   | -0.0006(16) | 0.0180(16)  | -0.0165(13) |
| C21  | 0.095(3)   | 0.0413(16) | 0.120(3)   | 0.0044(17)  | 0.010(2)    | -0.0152(16) |
| C22  | 0.0474(14) | 0.0376(12) | 0.0498(14) | 0.0024(10)  | -0.0045(11) | -0.0019(10) |
| C23  | 0.0463(15) | 0.0504(15) | 0.086(2)   | -0.0040(14) | 0.0175(14)  | -0.0024(12) |
| C24  | 0.0558(17) | 0.0451(14) | 0.080(2)   | 0.0058(13)  | 0.0088(14)  | -0.0131(12) |
| C25  | 0.0508(15) | 0.0409(12) | 0.0444(13) | 0.0037(10)  | -0.0113(11) | 0.0017(11)  |
| C26  | 0.0433(14) | 0.0553(16) | 0.0708(18) | 0.0051(13)  | 0.0046(13)  | 0.0043(12)  |
| C27  | 0.0460(15) | 0.0500(15) | 0.0713(18) | 0.0087(13)  | 0.0053(13)  | -0.0090(12) |
| C28  | 0.0685(18) | 0.0457(14) | 0.0521(15) | -0.0014(11) | -0.0185(13) | 0.0036(12)  |
| C29  | 0.0318(11) | 0.0312(10) | 0.0408(12) | -0.0049(9)  | 0.0011(9)   | -0.0063(9)  |
| C210 | 0.0556(15) | 0.0390(13) | 0.0539(15) | -0.0151(11) | -0.0051(12) | -0.0095(11) |
| C211 | 0.0360(12) | 0.0330(11) | 0.0481(13) | -0.0023(10) | -0.0013(10) | -0.0065(9)  |
| C212 | 0.0593(16) | 0.0411(13) | 0.0565(16) | 0.0105(11)  | -0.0148(12) | -0.0025(11) |
| C213 | 0.0487(15) | 0.0469(14) | 0.0770(19) | 0.0013(13)  | -0.0195(13) | -0.0012(12) |
| C214 | 0.0338(12) | 0.0451(13) | 0.0569(15) | -0.0036(11) | -0.0012(11) | -0.0074(10) |
| C215 | 0.0377(12) | 0.0342(11) | 0.0373(12) | -0.0030(9)  | 0.0000(9)   | -0.0041(9)  |
| C216 | 0.0298(11) | 0.0297(10) | 0.0395(12) | -0.0025(9)  | -0.0005(9)  | -0.0042(8)  |
| C217 | 0.0716(18) | 0.0563(15) | 0.0482(15) | -0.0139(12) | -0.0099(13) | -0.0163(13) |
| N11  | 0.0387(11) | 0.0357(10) | 0.0894(16) | -0.0147(10) | -0.0059(11) | 0.0058(9)   |

|     | <b>U<sub>11</sub></b> | <b>U<sub>22</sub></b> | <b>U<sub>33</sub></b> | <b>U<sub>23</sub></b> | <b>U<sub>13</sub></b> | <b>U<sub>12</sub></b> |
|-----|-----------------------|-----------------------|-----------------------|-----------------------|-----------------------|-----------------------|
| N12 | 0.0421(12)            | 0.0435(12)            | 0.0848(16)            | -0.0104(11)           | -0.0014(11)           | -0.0092(9)            |
| N13 | 0.0518(13)            | 0.0343(10)            | 0.0697(14)            | -0.0077(9)            | -0.0046(11)           | -0.0089(9)            |
| N14 | 0.0509(12)            | 0.0317(10)            | 0.0658(14)            | -0.0117(9)            | -0.0006(10)           | 0.0012(9)             |
| N15 | 0.0408(11)            | 0.0382(10)            | 0.0583(12)            | -0.0073(9)            | 0.0038(9)             | -0.0099(8)            |
| N21 | 0.0478(11)            | 0.0320(9)             | 0.0427(11)            | 0.0020(8)             | -0.0090(9)            | 0.0018(8)             |
| N22 | 0.0484(11)            | 0.0362(10)            | 0.0453(11)            | -0.0093(8)            | -0.0065(9)            | -0.0056(8)            |
| N23 | 0.0548(12)            | 0.0291(9)             | 0.0597(13)            | -0.0077(9)            | -0.0091(10)           | -0.0052(9)            |
| N24 | 0.0571(13)            | 0.0289(9)             | 0.0635(13)            | 0.0040(9)             | -0.0162(10)           | -0.0046(9)            |
| N25 | 0.0402(10)            | 0.0344(9)             | 0.0395(10)            | -0.0070(8)            | -0.0012(8)            | -0.0074(8)            |
| O11 | 0.0690(13)            | 0.0513(11)            | 0.0970(16)            | -0.0140(11)           | 0.0027(11)            | -0.0019(10)           |
| O21 | 0.0689(13)            | 0.0382(9)             | 0.0876(14)            | 0.0014(9)             | 0.0058(10)            | -0.0012(9)            |

**Table S7.** Hydrogen atomic coordinates and isotropic atomic displacement parameters ( $\text{\AA}^2$ ) for **2a**.

|      | <b>x/a</b> | <b>y/b</b> | <b>z/c</b> | <b>U(eq)</b> |
|------|------------|------------|------------|--------------|
| H11A | 0.3943     | -0.3792    | 0.5427     | 0.143        |
| H11B | 0.5122     | -0.4627    | 0.5814     | 0.143        |
| H11C | 0.5481     | -0.3538    | 0.5299     | 0.143        |
| H13  | 0.4654     | -0.2538    | 0.8269     | 0.07         |
| H14  | 0.4280     | -0.0787    | 0.8427     | 0.073        |
| H16  | 0.3621     | -0.0254    | 0.5422     | 0.074        |
| H17  | 0.4023     | -0.2015    | 0.5246     | 0.07         |
| H18A | 0.4285     | 0.0982     | 0.7610     | 0.093        |
| H18B | 0.4132     | 0.1194     | 0.6410     | 0.093        |
| H110 | 0.3357     | 0.4323     | 0.6723     | 0.071        |
| H11D | -0.2846    | 0.4626     | 0.7799     | 0.065        |
| H11E | -0.2253    | 0.3544     | 0.8313     | 0.065        |
| H11F | -0.2782    | 0.4003     | 0.6203     | 0.072        |
| H11G | -0.3598    | 0.3277     | 0.6988     | 0.072        |
| H11H | -0.2262    | 0.2235     | 0.5948     | 0.063        |
| H11I | -0.0953    | 0.2787     | 0.6105     | 0.063        |
| H11J | 0.0066     | 0.1376     | 0.8326     | 0.05         |
| H11K | -0.0955    | 0.2356     | 0.8517     | 0.05         |
| H11L | -0.2977    | 0.1684     | 0.8210     | 0.11         |
| H11M | -0.2131    | 0.0593     | 0.8182     | 0.11         |
| H11N | -0.3080    | 0.1025     | 0.7272     | 0.11         |
| H21A | 0.2898     | 0.0870     | 1.0888     | 0.129        |
| H21B | 0.3645     | 0.0043     | 1.0192     | 0.129        |
| H21C | 0.2362     | 0.0765     | 0.9790     | 0.129        |
| H23  | 0.5294     | 0.2982     | 0.9073     | 0.074        |
| H24  | 0.4599     | 0.4731     | 0.8970     | 0.073        |
| H26  | 0.0967     | 0.4129     | 1.0284     | 0.07         |
| H27  | 0.1624     | 0.2371     | 1.0352     | 0.068        |
| H28A | 0.1579     | 0.5892     | 1.0155     | 0.067        |
| H28B | 0.3042     | 0.6139     | 0.9704     | 0.067        |
| H210 | 0.1184     | 0.9191     | 0.9649     | 0.058        |
| H21D | -0.0255    | 0.8672     | 0.5377     | 0.064        |
| H21E | -0.1263    | 0.9688     | 0.5365     | 0.064        |
| H21F | -0.2441    | 0.8199     | 0.5398     | 0.069        |
| H21G | -0.2911    | 0.8854     | 0.6324     | 0.069        |

|      | <b>x/a</b> | <b>y/b</b> | <b>z/c</b> | <b>U(eq)</b> |
|------|------------|------------|------------|--------------|
| H21H | -0.1807    | 0.7656     | 0.7479     | 0.054        |
| H21I | -0.2737    | 0.7072     | 0.6839     | 0.054        |
| H21J | 0.0811     | 0.7486     | 0.5980     | 0.044        |
| H21K | 0.1324     | 0.6477     | 0.6670     | 0.044        |
| H21L | -0.1686    | 0.5875     | 0.5635     | 0.086        |
| H21M | -0.0077    | 0.5713     | 0.5506     | 0.086        |
| H21N | -0.0872    | 0.6751     | 0.5046     | 0.086        |
| H14A | -0.0777    | 0.5006     | 0.7594     | 0.059        |
| H24A | -0.0277    | 1.0030     | 0.6693     | 0.06         |

**Figure S4.** X-ray crystal structure of **7a**. Deposition number in Cambridge Structural Database: CCDC 1866157.

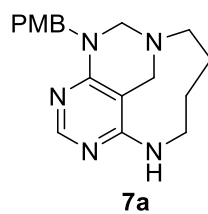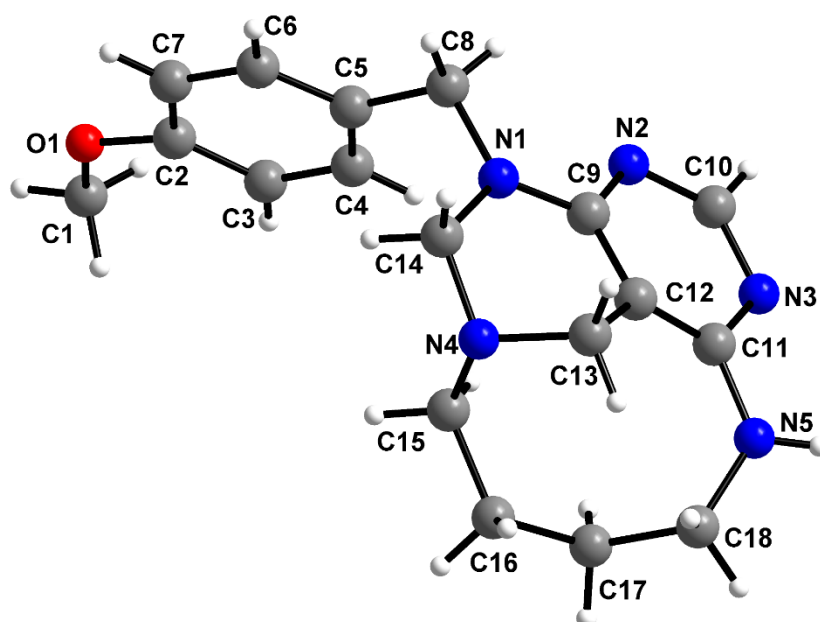

**Table S8.** Crystal data and structure refinement for **7a**.

|                                            |                                                                                                                                                               |                           |
|--------------------------------------------|---------------------------------------------------------------------------------------------------------------------------------------------------------------|---------------------------|
| <b>Chemical formula</b>                    | C <sub>18</sub> H <sub>23</sub> N <sub>5</sub> O                                                                                                              |                           |
| <b>Formula weight</b>                      | 325.41                                                                                                                                                        |                           |
| <b>Temperature</b>                         | 296(2) K                                                                                                                                                      |                           |
| <b>Wavelength</b>                          | 0.71073 Å                                                                                                                                                     |                           |
| <b>Crystal size</b>                        | 0.200 x 0.200 x 0.240 mm                                                                                                                                      |                           |
| <b>Crystal habit</b>                       | colorless block                                                                                                                                               |                           |
| <b>Crystal system</b>                      | monoclinic                                                                                                                                                    |                           |
| <b>Space group</b>                         | P 1 2 <sub>1</sub> /n 1                                                                                                                                       |                           |
| <b>Unit cell dimensions</b>                | a = 8.8828(6) Å                                                                                                                                               | a = 8.8828(6) Å           |
|                                            | b = 19.2484(13) Å                                                                                                                                             | b = 19.2484(13) Å         |
|                                            | c = 10.8095(7) Å                                                                                                                                              | c = 10.8095(7) Å          |
| <b>Volume</b>                              | 1695.3(2) Å <sup>3</sup>                                                                                                                                      | 1695.3(2) Å <sup>3</sup>  |
| <b>Z</b>                                   | 4                                                                                                                                                             |                           |
| <b>Density (calculated)</b>                | 1.275 g/cm <sup>3</sup>                                                                                                                                       |                           |
| <b>Absorption coefficient</b>              | 0.083 mm <sup>-1</sup>                                                                                                                                        |                           |
| <b>F(000)</b>                              | 696                                                                                                                                                           |                           |
| <b>Theta range for data collection</b>     | 2.12 to 28.46°                                                                                                                                                |                           |
| <b>Index ranges</b>                        | -11<=h<=11, -25<=k<=25, -14<=l<=14                                                                                                                            |                           |
| <b>Reflections collected</b>               | 58559                                                                                                                                                         |                           |
| <b>Independent reflections</b>             | 4271 [R(int) = 0.0430]                                                                                                                                        |                           |
| <b>Coverage of independent reflections</b> | 99.8%                                                                                                                                                         |                           |
| <b>Absorption correction</b>               | multi-scan                                                                                                                                                    |                           |
| <b>Max. and min. transmission</b>          | 0.9840 and 0.9800                                                                                                                                             |                           |
| <b>Refinement method</b>                   | Full-matrix least-squares on F <sup>2</sup>                                                                                                                   |                           |
| <b>Refinement program</b>                  | SHELXL-2013 (Sheldrick, 2013)                                                                                                                                 |                           |
| <b>Function minimized</b>                  | Σ w(F <sub>o</sub> <sup>2</sup> - F <sub>c</sub> <sup>2</sup> ) <sup>2</sup>                                                                                  |                           |
| <b>Data / restraints / parameters</b>      | 4271 / 0 / 218                                                                                                                                                |                           |
| <b>Goodness-of-fit on F<sup>2</sup></b>    | 1.007                                                                                                                                                         |                           |
| <b>Final R indices</b>                     | 2783 data; I>2σ(I)                                                                                                                                            | R1 = 0.0479, wR2 = 0.1151 |
|                                            | all data                                                                                                                                                      | R1 = 0.0824, wR2 = 0.1365 |
| <b>Weighting scheme</b>                    | w=1/[σ <sup>2</sup> (F <sub>o</sub> <sup>2</sup> )+(0.0544P) <sup>2</sup> +0.4518P]<br>where P=(F <sub>o</sub> <sup>2</sup> +2F <sub>c</sub> <sup>2</sup> )/3 |                           |
| <b>Largest diff. peak and hole</b>         | 0.264 and -0.256 eÅ <sup>-3</sup>                                                                                                                             |                           |
| <b>R.M.S. deviation from mean</b>          | 0.031 eÅ <sup>-3</sup>                                                                                                                                        |                           |

**Table S9.** Atomic coordinates and equivalent isotropic atomic displacement parameters ( $\text{\AA}^2$ ) for **7a**.  $U(\text{eq})$  is defined as one-third of the trace of the orthogonalized  $U_{ij}$  tensor.

|     | <b>x/a</b>  | <b>y/b</b>  | <b>z/c</b>  | <b>U(eq)</b> |
|-----|-------------|-------------|-------------|--------------|
| C1  | 0.9322(3)   | 0.53666(13) | 0.6828(2)   | 0.1014(9)    |
| C2  | 0.1392(2)   | 0.48546(9)  | 0.87647(19) | 0.0646(5)    |
| C3  | 0.0815(2)   | 0.41919(9)  | 0.83958(19) | 0.0604(5)    |
| C4  | 0.1663(2)   | 0.36354(9)  | 0.91544(18) | 0.0571(4)    |
| C5  | 0.3091(2)   | 0.37189(9)  | 0.02939(17) | 0.0526(4)    |
| C6  | 0.3613(3)   | 0.43905(11) | 0.0665(2)   | 0.0834(7)    |
| C7  | 0.2786(3)   | 0.49497(11) | 0.9911(2)   | 0.0938(8)    |
| C8  | 0.4055(2)   | 0.31040(10) | 0.10779(18) | 0.0594(4)    |
| C9  | 0.25907(19) | 0.20102(8)  | 0.10969(15) | 0.0475(4)    |
| C10 | 0.2229(2)   | 0.11722(9)  | 0.95582(17) | 0.0565(4)    |
| C11 | 0.1005(2)   | 0.10107(8)  | 0.10316(15) | 0.0484(4)    |
| C12 | 0.18125(19) | 0.15928(8)  | 0.17309(14) | 0.0465(4)    |
| C13 | 0.1855(2)   | 0.18571(9)  | 0.30550(15) | 0.0538(4)    |
| C14 | 0.2689(3)   | 0.29642(10) | 0.26626(19) | 0.0673(5)    |
| C15 | 0.9785(2)   | 0.27072(9)  | 0.18705(19) | 0.0613(5)    |
| C16 | 0.8450(2)   | 0.22781(10) | 0.2061(2)   | 0.0658(5)    |
| C17 | 0.7904(2)   | 0.15896(10) | 0.12897(18) | 0.0611(4)    |
| C18 | 0.8771(2)   | 0.09021(9)  | 0.18902(17) | 0.0588(4)    |
| N1  | 0.31221(18) | 0.26539(7)  | 0.15956(14) | 0.0560(4)    |
| N2  | 0.28392(17) | 0.17966(7)  | 0.99998(13) | 0.0541(3)    |
| N3  | 0.12932(18) | 0.07701(7)  | 0.99502(14) | 0.0560(4)    |
| N4  | 0.14333(18) | 0.25941(7)  | 0.29235(13) | 0.0573(4)    |
| N5  | 0.99179(19) | 0.06305(7)  | 0.13487(15) | 0.0618(4)    |
| O1  | 0.0706(2)   | 0.54421(7)  | 0.80459(16) | 0.0946(5)    |



**Table S10.** Bond lengths (Å) for **7a**.

|          |            |          |          |
|----------|------------|----------|----------|
| C1-O1    | 1.406(3)   | C1-H1A   | 0.96     |
| C1-H1B   | 0.96       | C1-H1C   | 0.96     |
| C2-O1    | 1.370(2)   | C2-C7    | 1.371(3) |
| C2-C3    | 1.373(2)   | C3-C4    | 1.377(2) |
| C3-H3    | 0.93       | C4-C5    | 1.381(2) |
| C4-H4    | 0.93       | C5-C6    | 1.378(2) |
| C5-C8    | 1.508(2)   | C6-C7    | 1.373(3) |
| C6-H6    | 0.93       | C7-H7    | 0.93     |
| C8-N1    | 1.456(2)   | C8-H8A   | 0.97     |
| C8-H8B   | 0.97       | C9-N2    | 1.354(2) |
| C9-N1    | 1.359(2)   | C9-C12   | 1.404(2) |
| C10-N3   | 1.323(2)   | C10-N2   | 1.327(2) |
| C10-H10  | 0.93       | C11-N5   | 1.360(2) |
| C11-N3   | 1.3730(19) | C11-C12  | 1.382(2) |
| C12-C13  | 1.505(2)   | C13-N4   | 1.460(2) |
| C13-H13A | 0.97       | C13-H13B | 0.97     |
| C14-N4   | 1.443(2)   | C14-N1   | 1.479(2) |
| C14-H14A | 0.97       | C14-H14B | 0.97     |
| C15-N4   | 1.469(2)   | C15-C16  | 1.525(3) |
| C15-H15A | 0.97       | C15-H15B | 0.97     |
| C16-C17  | 1.538(3)   | C16-H16A | 0.97     |
| C16-H16B | 0.97       | C17-C18  | 1.539(2) |
| C17-H17A | 0.97       | C17-H17B | 0.97     |
| C18-N5   | 1.459(2)   | C18-H18A | 0.97     |
| C18-H18B | 0.97       | N5-H5    | 0.86     |

**Table S11.** Bond angles (°) for **7a**.

|              |            |               |            |
|--------------|------------|---------------|------------|
| O1-C1-H1A    | 109.5      | O1-C1-H1B     | 109.5      |
| H1A-C1-H1B   | 109.5      | O1-C1-H1C     | 109.5      |
| H1A-C1-H1C   | 109.5      | H1B-C1-H1C    | 109.5      |
| O1-C2-C7     | 116.10(16) | O1-C2-C3      | 124.88(17) |
| C7-C2-C3     | 118.99(18) | C2-C3-C4      | 119.83(16) |
| C2-C3-H3     | 120.1      | C4-C3-H3      | 120.1      |
| C3-C4-C5     | 122.08(15) | C3-C4-H4      | 119.0      |
| C5-C4-H4     | 119.0      | C6-C5-C4      | 116.87(17) |
| C6-C5-C8     | 121.50(16) | C4-C5-C8      | 121.62(15) |
| C7-C6-C5     | 121.59(18) | C7-C6-H6      | 119.2      |
| C5-C6-H6     | 119.2      | C2-C7-C6      | 120.59(18) |
| C2-C7-H7     | 119.7      | C6-C7-H7      | 119.7      |
| N1-C8-C5     | 113.59(14) | N1-C8-H8A     | 108.8      |
| C5-C8-H8A    | 108.8      | N1-C8-H8B     | 108.8      |
| C5-C8-H8B    | 108.8      | H8A-C8-H8B    | 107.7      |
| N2-C9-N1     | 118.19(15) | N2-C9-C12     | 122.53(15) |
| N1-C9-C12    | 119.28(14) | N3-C10-N2     | 129.30(15) |
| N3-C10-H10   | 115.3      | N2-C10-H10    | 115.3      |
| N5-C11-N3    | 115.15(15) | N5-C11-C12    | 124.38(14) |
| N3-C11-C12   | 120.47(15) | C11-C12-C9    | 116.51(14) |
| C11-C12-C13  | 127.24(15) | C9-C12-C13    | 116.11(14) |
| N4-C13-C12   | 109.12(12) | N4-C13-H13A   | 109.9      |
| C12-C13-H13A | 109.9      | N4-C13-H13B   | 109.9      |
| C12-C13-H13B | 109.9      | H13A-C13-H13B | 108.3      |
| N4-C14-N1    | 114.48(14) | N4-C14-H14A   | 108.6      |
| N1-C14-H14A  | 108.6      | N4-C14-H14B   | 108.6      |
| N1-C14-H14B  | 108.6      | H14A-C14-H14B | 107.6      |
| N4-C15-C16   | 113.81(15) | N4-C15-H15A   | 108.8      |
| C16-C15-H15A | 108.8      | N4-C15-H15B   | 108.8      |
| C16-C15-H15B | 108.8      | H15A-C15-H15B | 107.7      |
| C15-C16-C17  | 119.21(15) | C15-C16-H16A  | 107.5      |
| C17-C16-H16A | 107.5      | C15-C16-H16B  | 107.5      |
| C17-C16-H16B | 107.5      | H16A-C16-H16B | 107.0      |
| C16-C17-C18  | 121.05(15) | C16-C17-H17A  | 107.1      |

---

|              |            |               |            |
|--------------|------------|---------------|------------|
| C18-C17-H17A | 107.1      | C16-C17-H17B  | 107.1      |
| C18-C17-H17B | 107.1      | H17A-C17-H17B | 106.8      |
| N5-C18-C17   | 116.80(14) | N5-C18-H18A   | 108.1      |
| C17-C18-H18A | 108.1      | N5-C18-H18B   | 108.1      |
| C17-C18-H18B | 108.1      | H18A-C18-H18B | 107.3      |
| C9-N1-C8     | 123.44(14) | C9-N1-C14     | 121.36(14) |
| C8-N1-C14    | 115.08(14) | C10-N2-C9     | 113.87(14) |
| C10-N3-C11   | 115.43(14) | C14-N4-C13    | 108.08(14) |
| C14-N4-C15   | 112.63(15) | C13-N4-C15    | 110.94(13) |
| C11-N5-C18   | 125.99(14) | C11-N5-H5     | 117.0      |
| C18-N5-H5    | 117.0      | C2-O1-C1      | 118.11(16) |

---

**Table S12.** Anisotropic atomic displacement parameters ( $\text{\AA}^2$ ) for **7a**. The anisotropic atomic displacement factor exponent takes the form:  $-2\pi^2[ h^2 a^{*2} U_{11} + \dots + 2 h k a^* b^* U_{12} ]$ .

|     | <b>U<sub>11</sub></b> | <b>U<sub>22</sub></b> | <b>U<sub>33</sub></b> | <b>U<sub>23</sub></b> | <b>U<sub>13</sub></b> | <b>U<sub>12</sub></b> |
|-----|-----------------------|-----------------------|-----------------------|-----------------------|-----------------------|-----------------------|
| C1  | 0.1011(18)            | 0.0746(14)            | 0.0911(16)            | -0.0077(12)           | -0.0012(14)           | 0.0197(13)            |
| C2  | 0.0651(11)            | 0.0499(10)            | 0.0676(11)            | -0.0110(9)            | 0.0148(9)             | -0.0056(8)            |
| C3  | 0.0465(9)             | 0.0562(10)            | 0.0673(11)            | -0.0129(8)            | 0.0108(8)             | -0.0073(8)            |
| C4  | 0.0493(9)             | 0.0484(9)             | 0.0704(11)            | -0.0139(8)            | 0.0204(8)             | -0.0123(7)            |
| C5  | 0.0493(9)             | 0.0549(9)             | 0.0536(9)             | -0.0087(7)            | 0.0203(7)             | -0.0104(7)            |
| C6  | 0.0828(14)            | 0.0632(12)            | 0.0690(12)            | -0.0125(10)           | -0.0068(11)           | -0.0197(11)           |
| C7  | 0.1047(17)            | 0.0512(11)            | 0.0849(15)            | -0.0157(11)           | -0.0051(13)           | -0.0210(11)           |
| C8  | 0.0497(9)             | 0.0656(11)            | 0.0591(10)            | -0.0055(8)            | 0.0174(8)             | -0.0069(8)            |
| C9  | 0.0473(8)             | 0.0497(9)             | 0.0414(8)             | 0.0008(7)             | 0.0134(7)             | 0.0091(7)             |
| C10 | 0.0673(11)            | 0.0569(10)            | 0.0499(9)             | -0.0042(8)            | 0.0283(8)             | 0.0128(9)             |
| C11 | 0.0563(9)             | 0.0438(8)             | 0.0440(8)             | 0.0036(6)             | 0.0187(7)             | 0.0130(7)             |
| C12 | 0.0493(8)             | 0.0481(8)             | 0.0381(7)             | 0.0035(6)             | 0.0130(6)             | 0.0116(7)             |
| C13 | 0.0562(10)            | 0.0630(10)            | 0.0356(7)             | 0.0010(7)             | 0.0112(7)             | 0.0049(8)             |
| C14 | 0.0828(13)            | 0.0675(11)            | 0.0553(10)            | -0.0194(9)            | 0.0314(10)            | -0.0137(10)           |
| C15 | 0.0743(12)            | 0.0483(9)             | 0.0626(10)            | -0.0018(8)            | 0.0285(9)             | 0.0135(8)             |
| C16 | 0.0634(11)            | 0.0702(12)            | 0.0671(11)            | -0.0055(9)            | 0.0295(9)             | 0.0152(9)             |
| C17 | 0.0568(10)            | 0.0724(12)            | 0.0526(10)            | 0.0001(8)             | 0.0203(8)             | 0.0023(9)             |
| C18 | 0.0676(11)            | 0.0612(10)            | 0.0520(9)             | -0.0003(8)            | 0.0286(8)             | -0.0040(9)            |
| N1  | 0.0635(9)             | 0.0560(8)             | 0.0505(8)             | -0.0071(6)            | 0.0248(7)             | -0.0050(7)            |
| N2  | 0.0593(8)             | 0.0571(8)             | 0.0492(7)             | -0.0024(6)            | 0.0251(7)             | 0.0063(7)             |
| N3  | 0.0691(9)             | 0.0477(8)             | 0.0550(8)             | -0.0054(6)            | 0.0288(7)             | 0.0077(7)             |
| N4  | 0.0674(9)             | 0.0590(8)             | 0.0460(7)             | -0.0131(6)            | 0.0231(7)             | -0.0030(7)            |
| N5  | 0.0802(10)            | 0.0460(8)             | 0.0685(9)             | -0.0036(7)            | 0.0395(8)             | -0.0005(7)            |
| O1  | 0.1024(12)            | 0.0523(8)             | 0.0908(10)            | -0.0048(7)            | -0.0019(9)            | -0.0010(8)            |

**Table S13.** Hydrogen atomic coordinates and isotropic atomic displacement parameters ( $\text{\AA}^2$ ) for **7a**.

|      | <b>x/a</b> | <b>y/b</b> | <b>z/c</b> | <b>U(eq)</b> |
|------|------------|------------|------------|--------------|
| H1A  | -0.0431    | 0.5048     | -0.3749    | 0.152        |
| H1B  | -0.0970    | 0.5810     | -0.3610    | 0.152        |
| H1C  | -0.1579    | 0.5190     | -0.2989    | 0.152        |
| H3   | -0.0146    | 0.4119     | -0.2365    | 0.073        |
| H4   | 0.1261     | 0.3189     | -0.1109    | 0.069        |
| H6   | 0.4548     | 0.4467     | 0.1446     | 0.1          |
| H7   | 0.3175     | 0.5397     | 0.0181     | 0.113        |
| H8A  | 0.4430     | 0.2833     | 0.0499     | 0.071        |
| H8B  | 0.5017     | 0.3272     | 0.1829     | 0.071        |
| H10  | 0.2498     | 0.0991     | -0.1125    | 0.068        |
| H13A | 0.1078     | 0.1600     | 0.3303     | 0.065        |
| H13B | 0.2942     | 0.1791     | 0.3757     | 0.065        |
| H14A | 0.3670     | 0.2985     | 0.3491     | 0.081        |
| H14B | 0.2321     | 0.3437     | 0.2407     | 0.081        |
| H15A | -0.0198    | 0.2594     | 0.1001     | 0.074        |
| H15B | -0.0489    | 0.3196     | 0.1857     | 0.074        |
| H16A | -0.2514    | 0.2571     | 0.1821     | 0.079        |
| H16B | -0.1179    | 0.2175     | 0.3015     | 0.079        |
| H17A | -0.2022    | 0.1649     | 0.0424     | 0.073        |
| H17B | -0.3249    | 0.1529     | 0.1107     | 0.073        |
| H18A | -0.0639    | 0.0966     | 0.2854     | 0.071        |
| H18B | -0.2065    | 0.0552     | 0.1761     | 0.071        |
| H5   | -0.0095    | 0.0189     | 0.1218     | 0.074        |

## VII. $^1\text{H}$ and $^{13}\text{C}$ NMR spectra

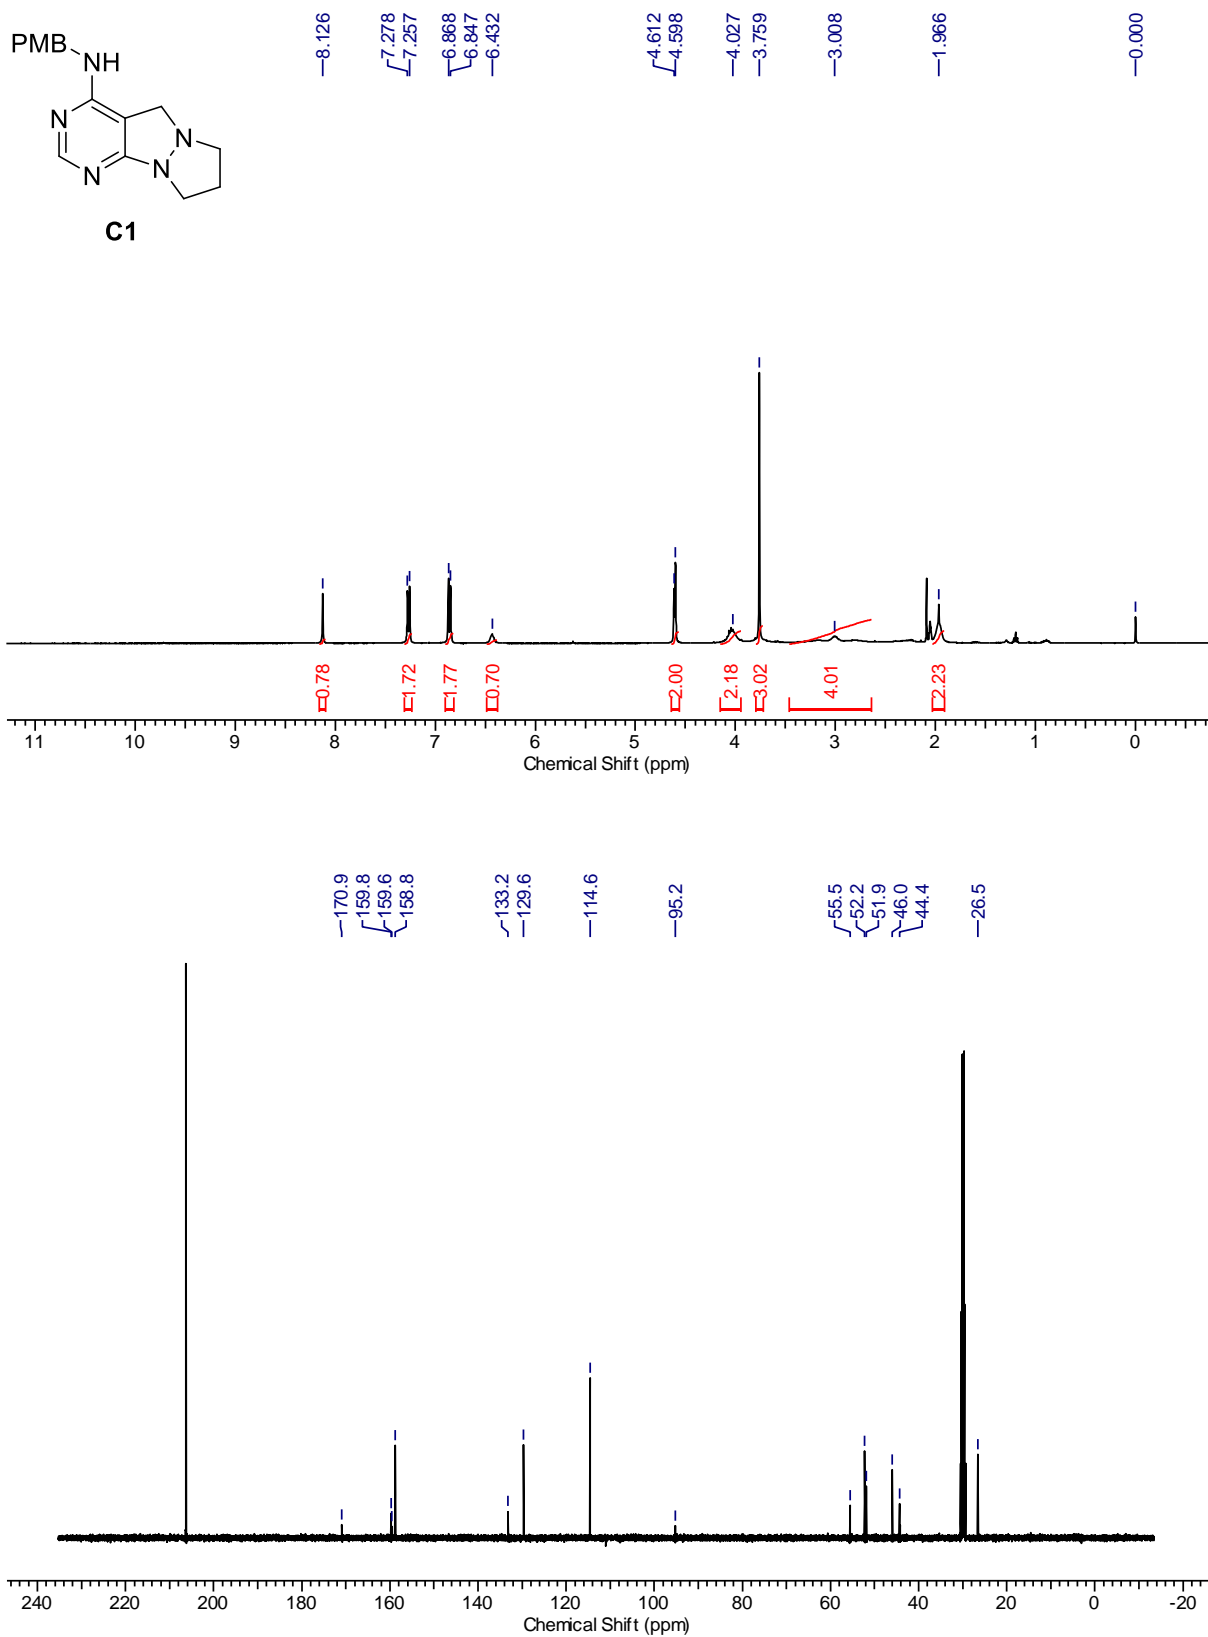

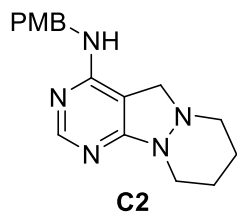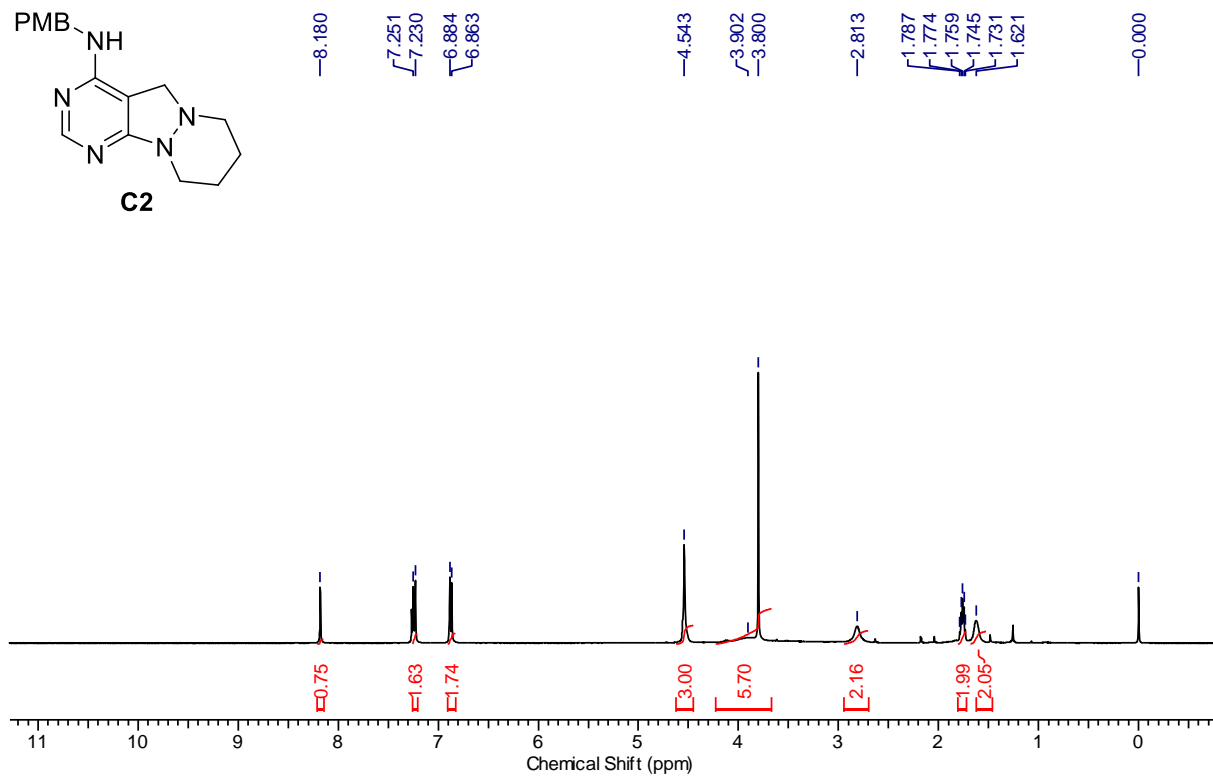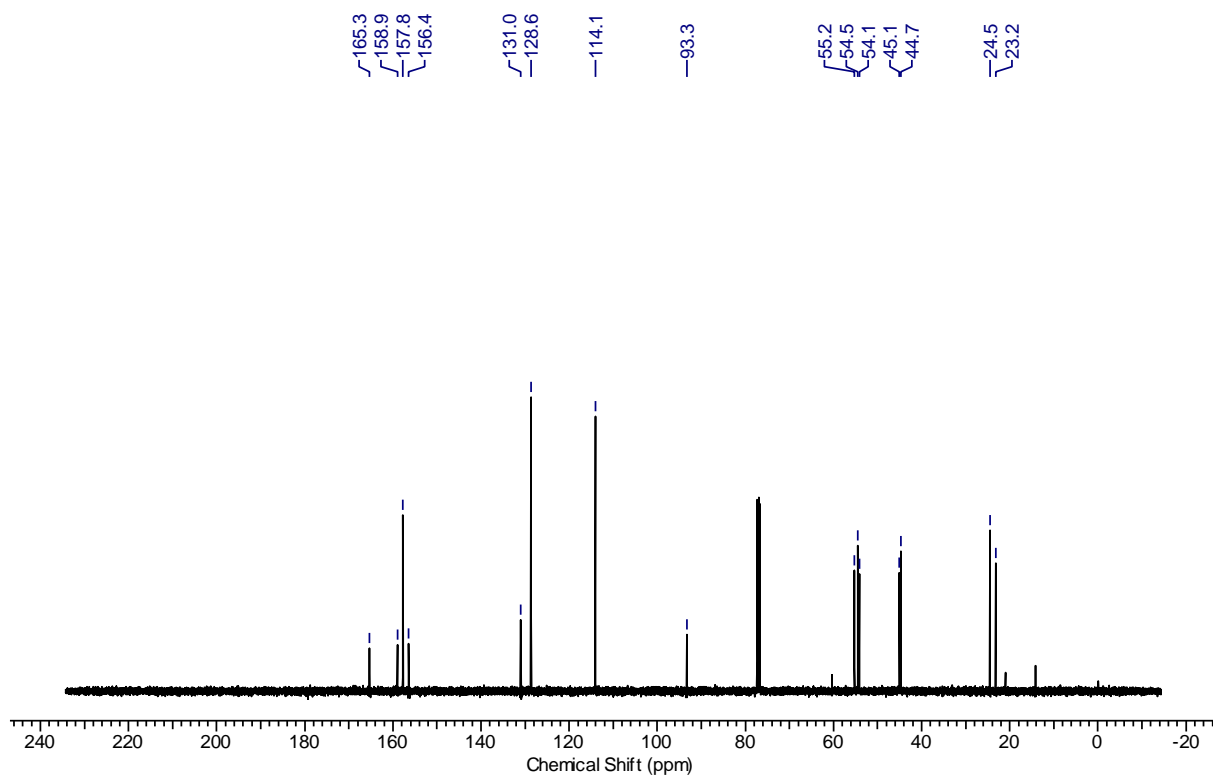

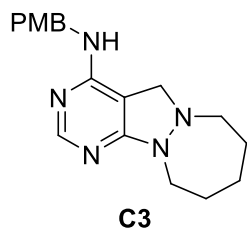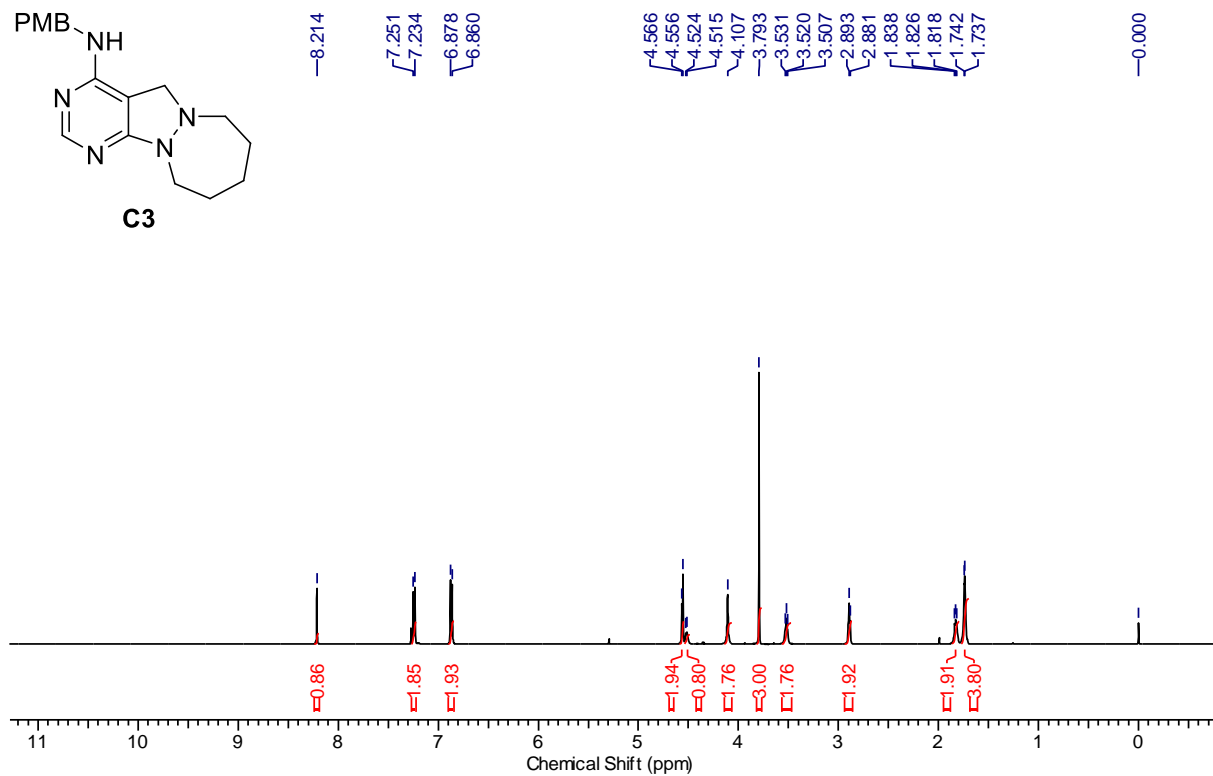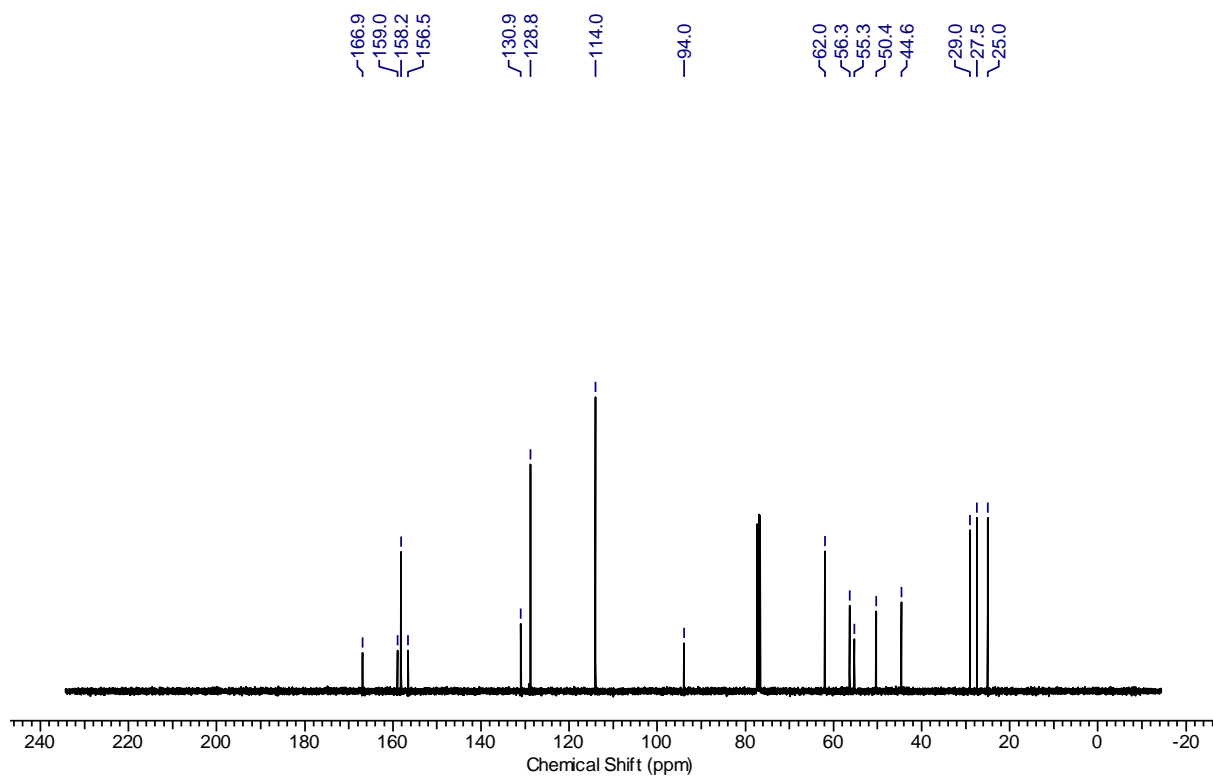





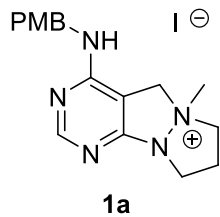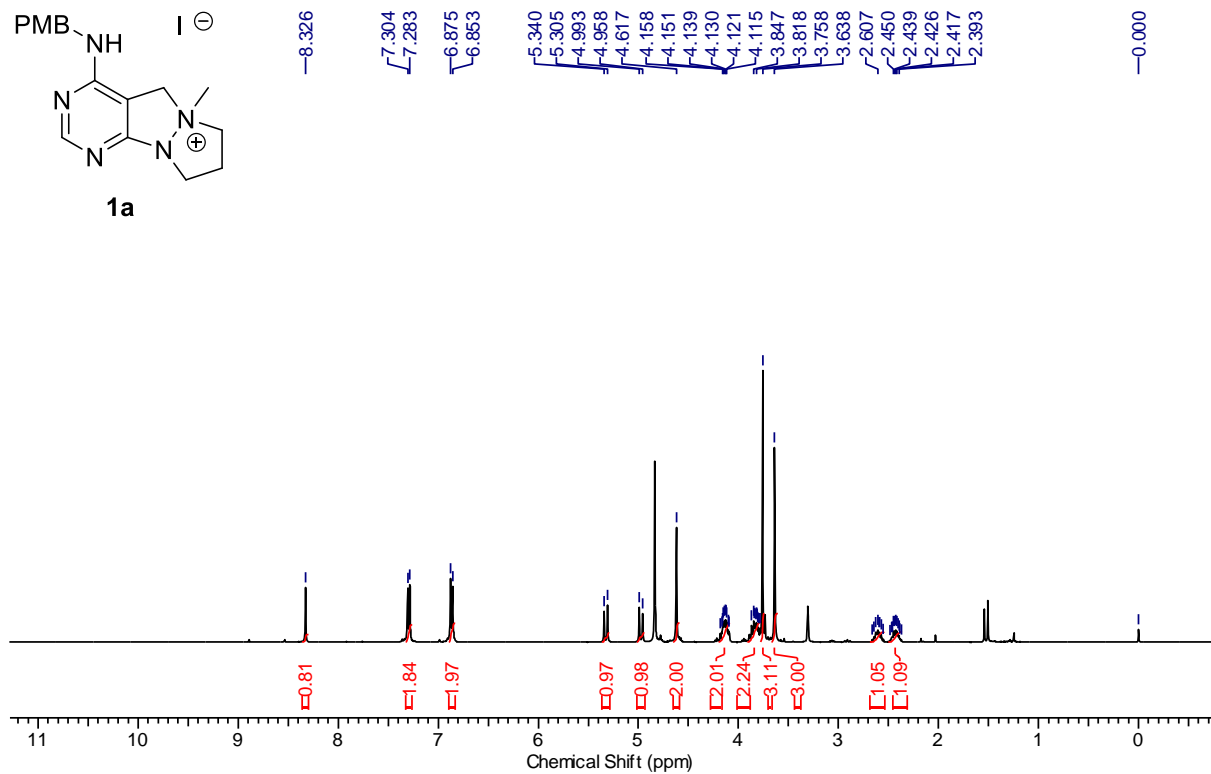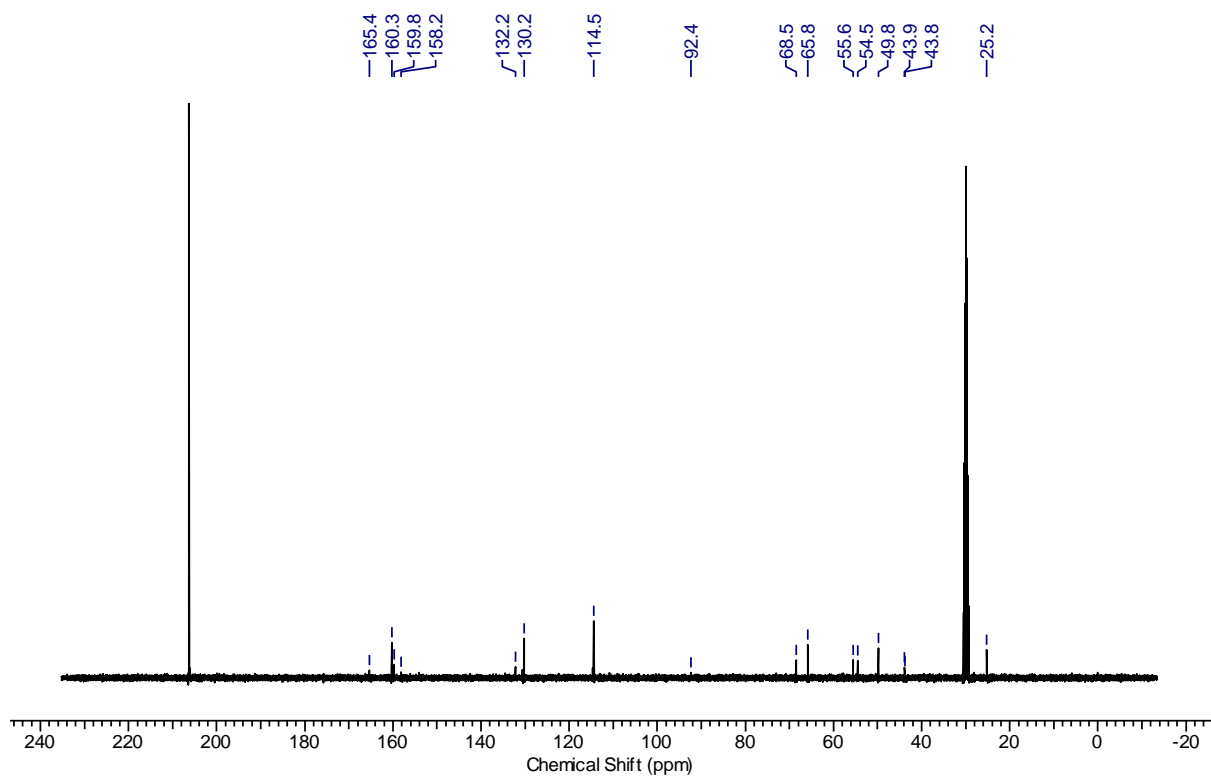

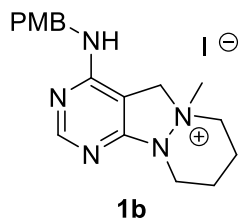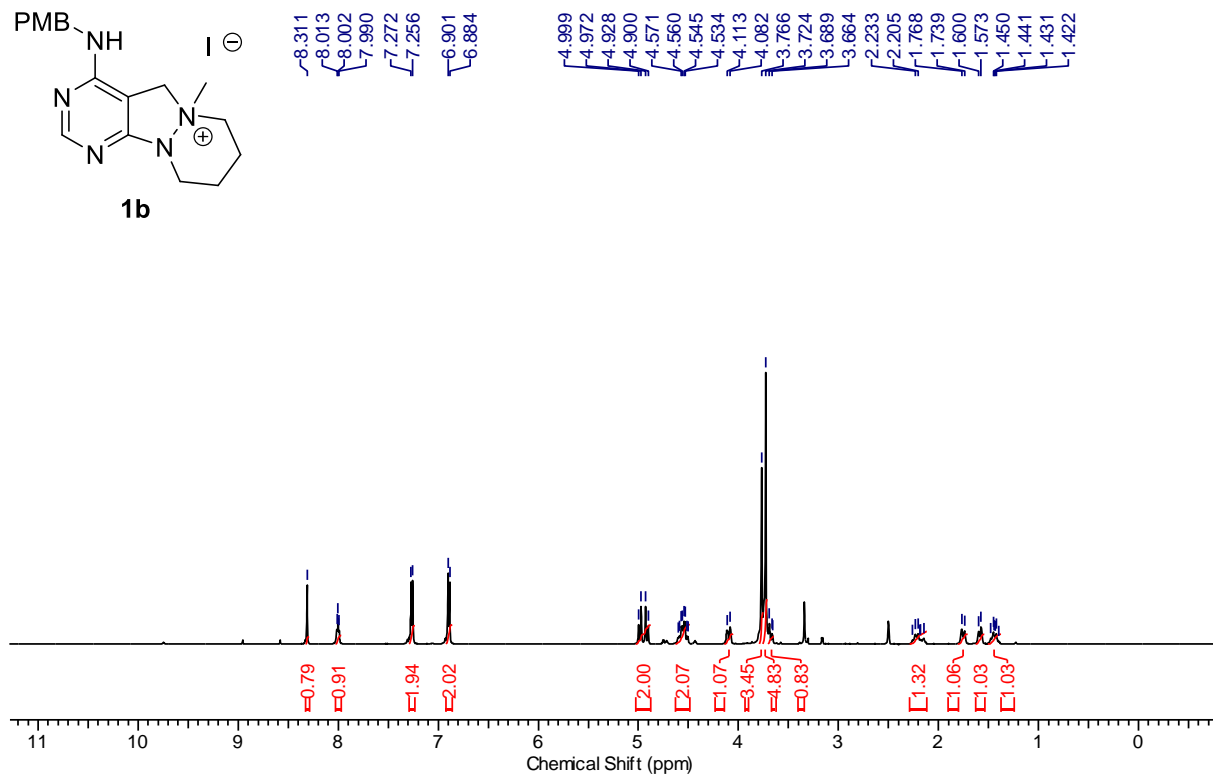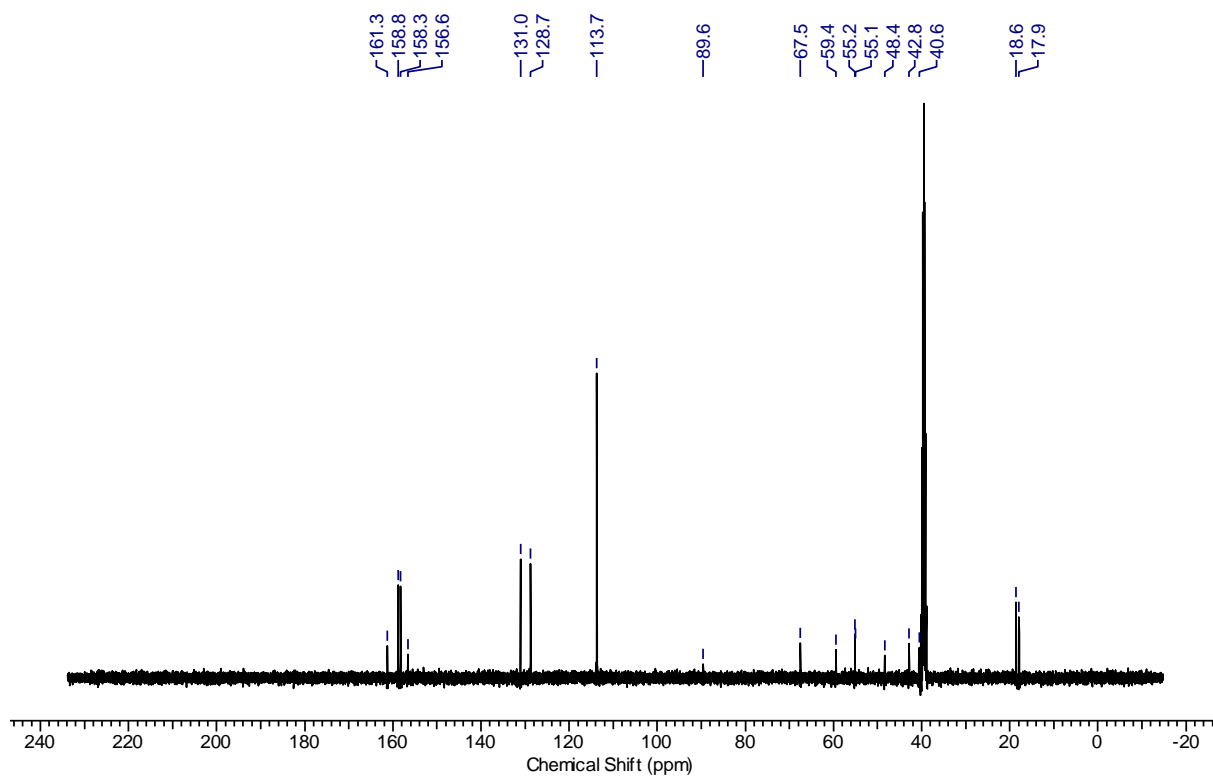

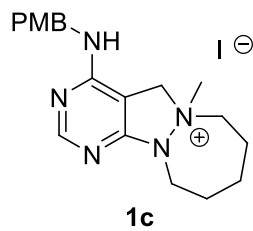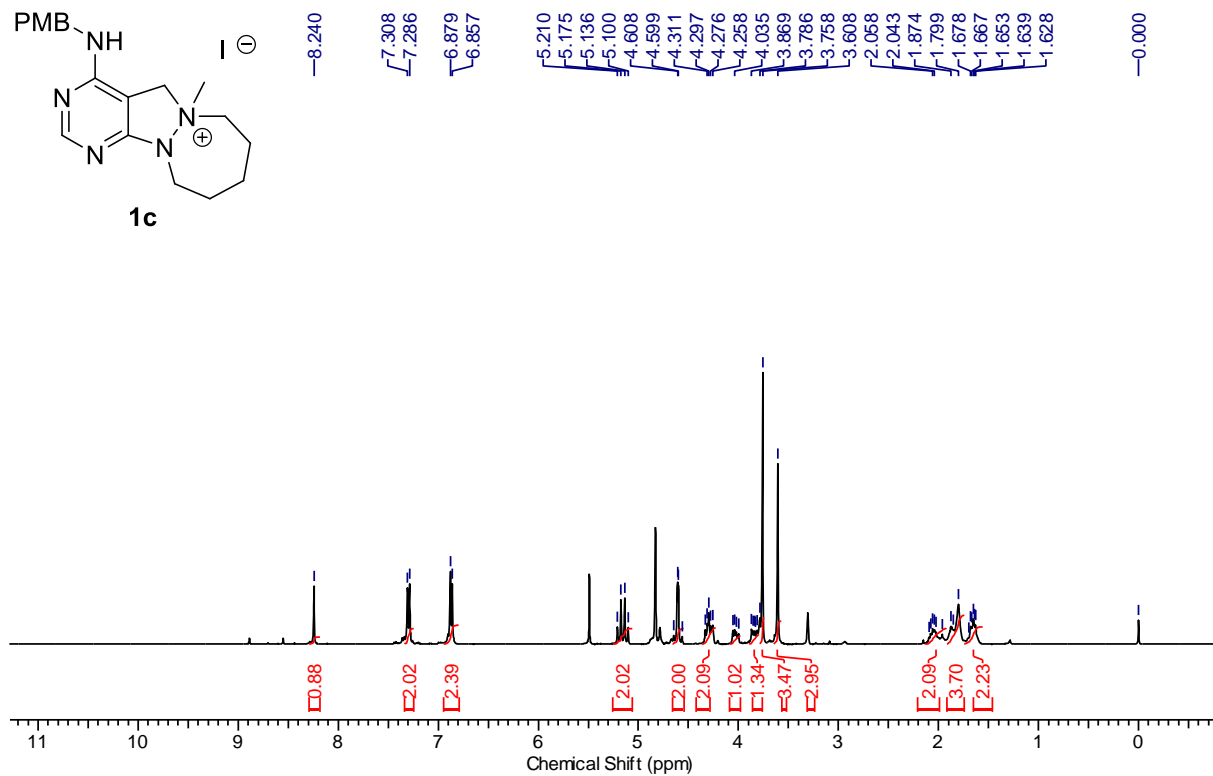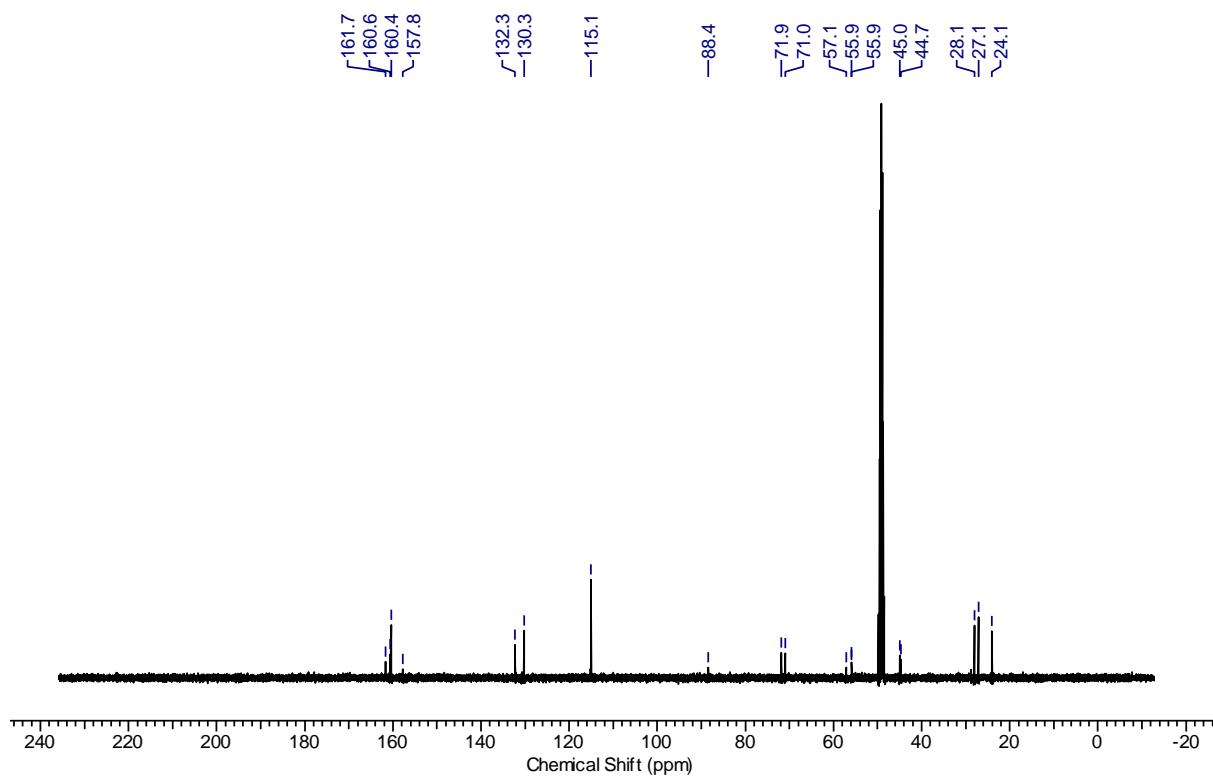

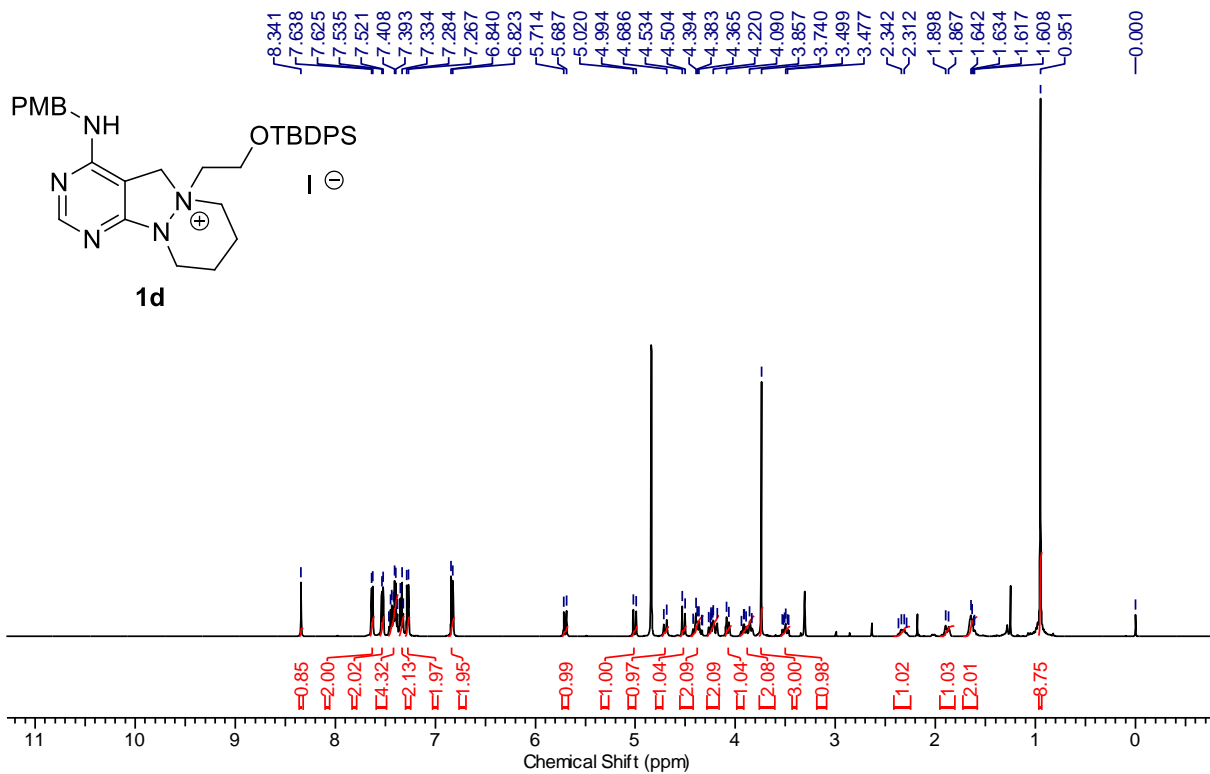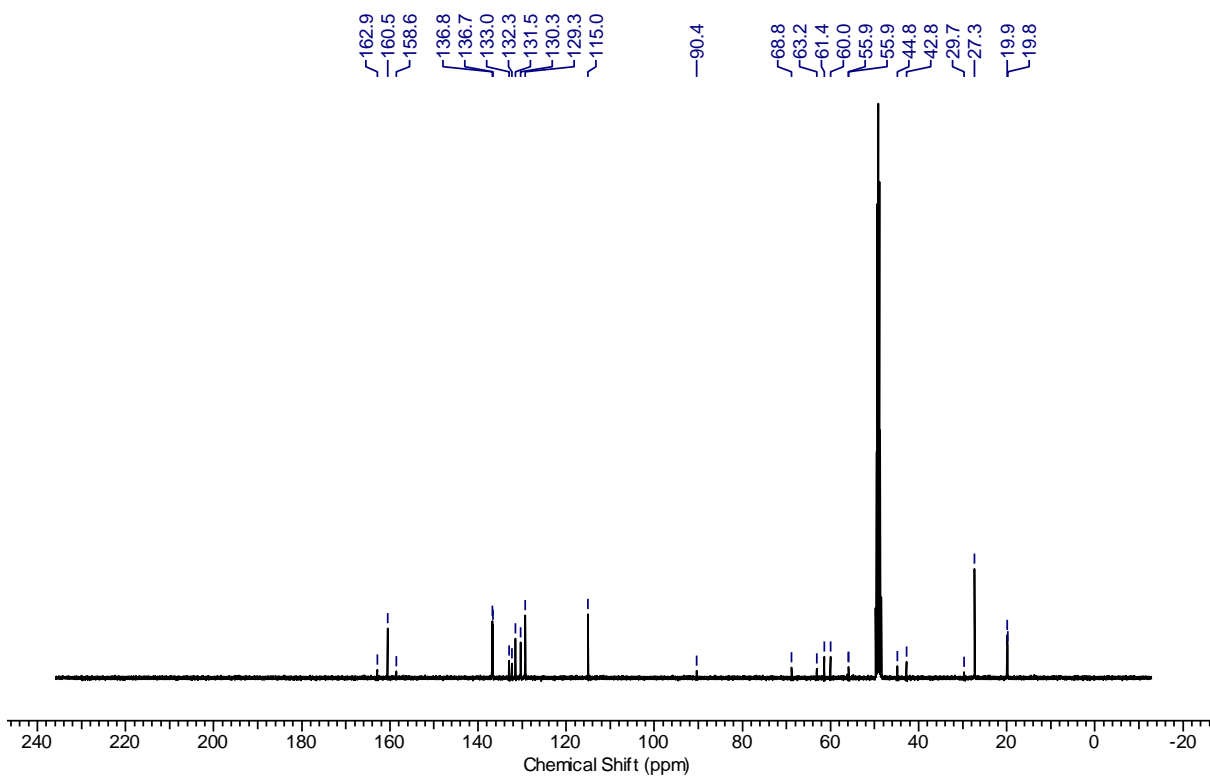

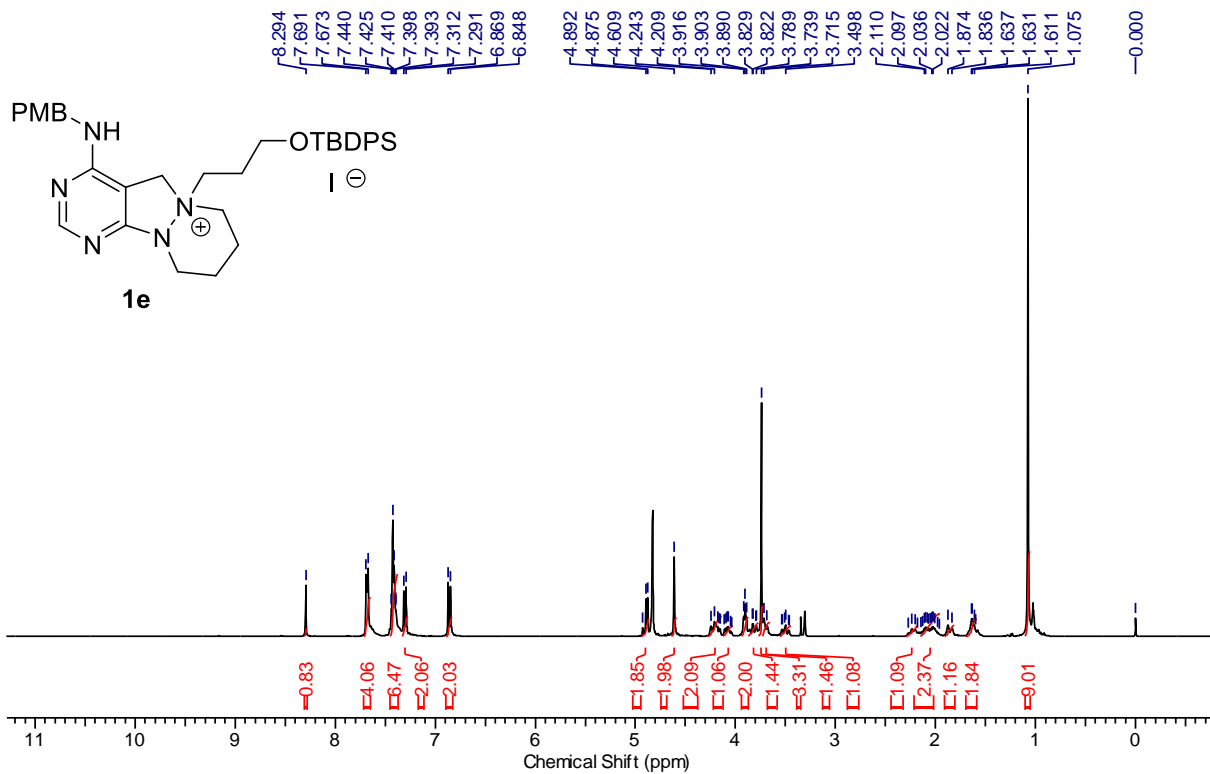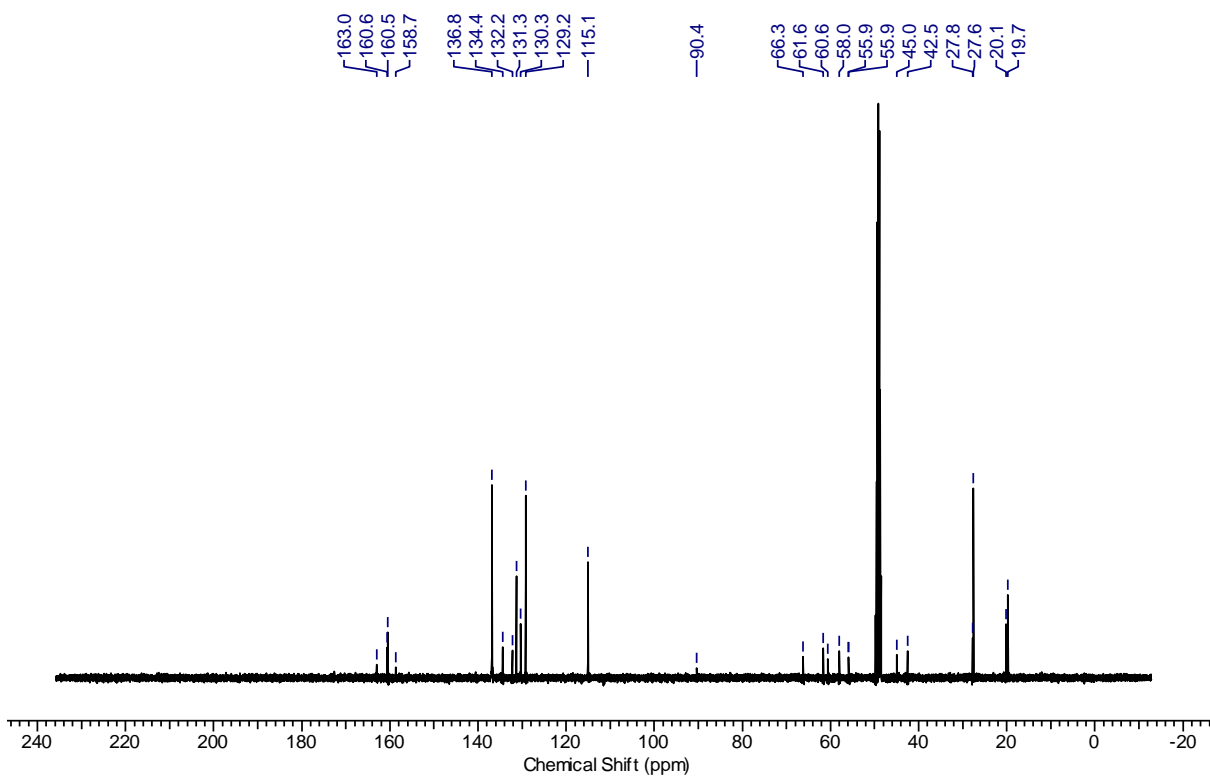

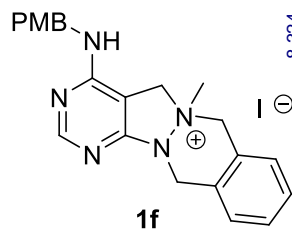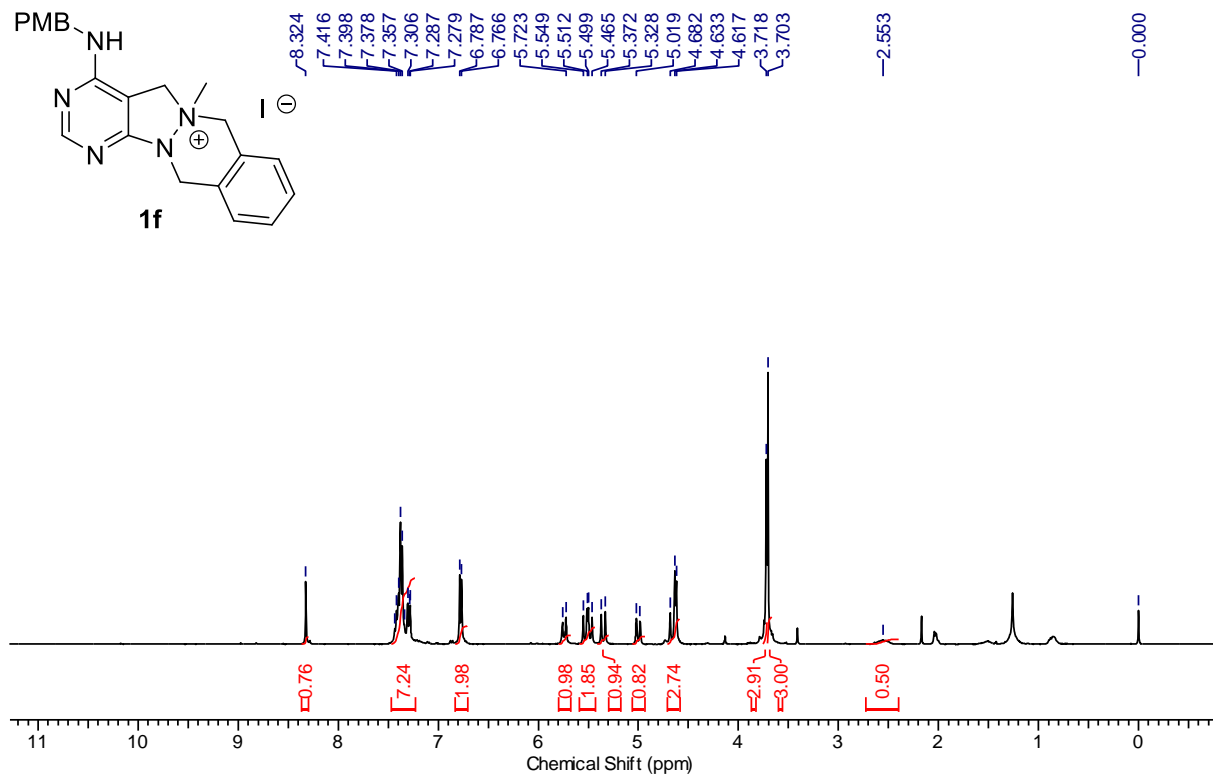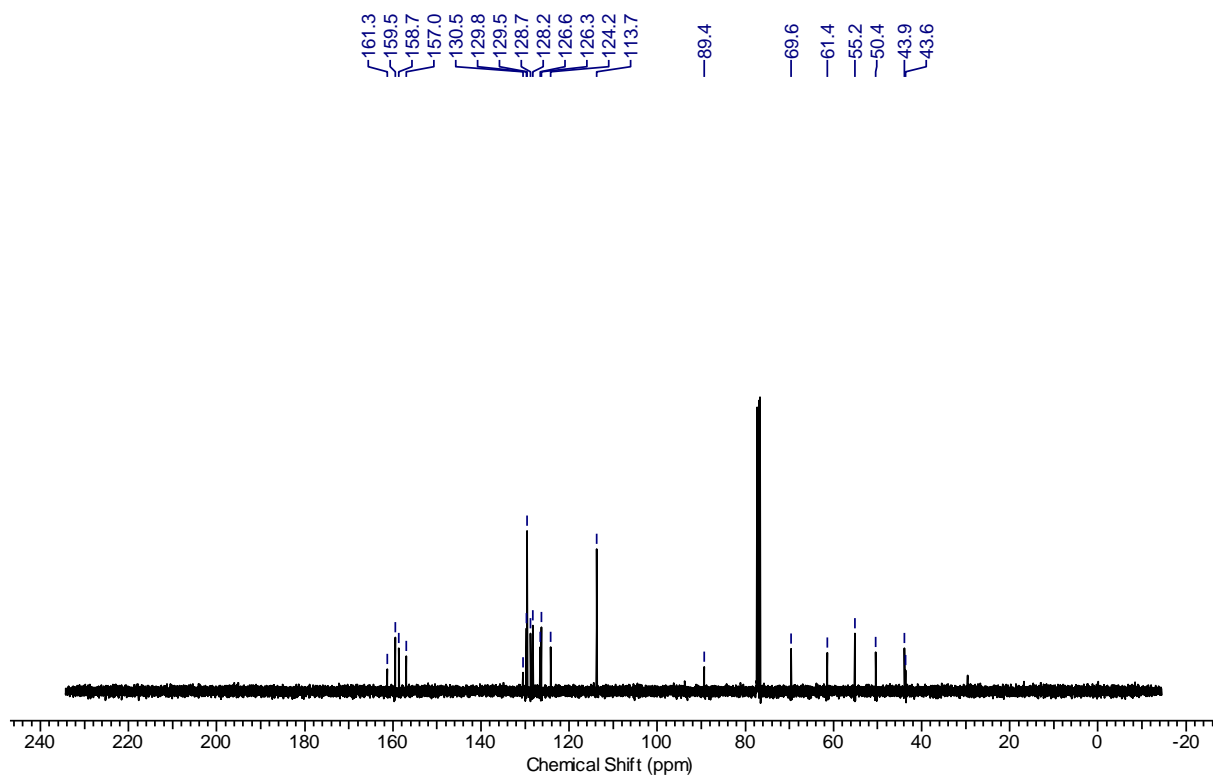

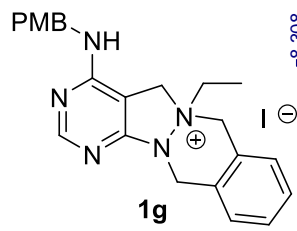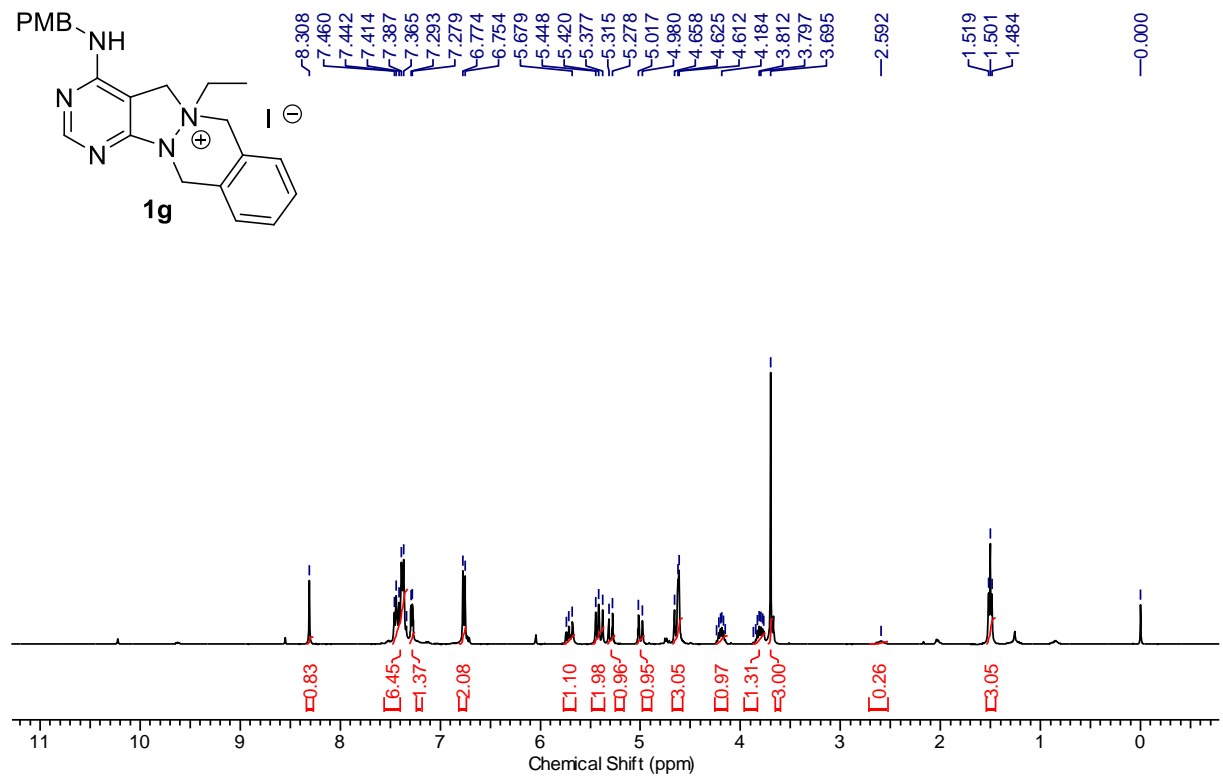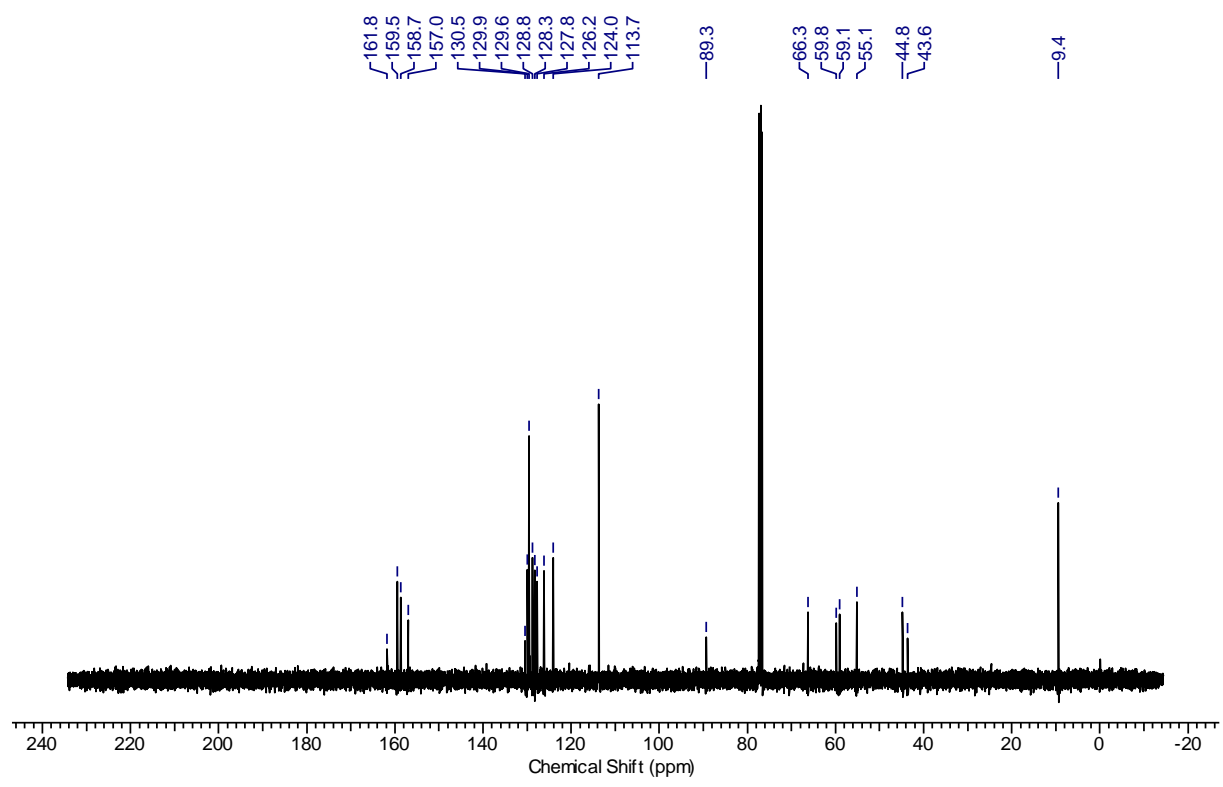



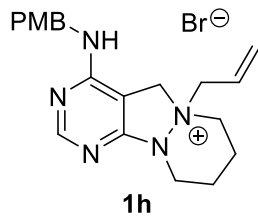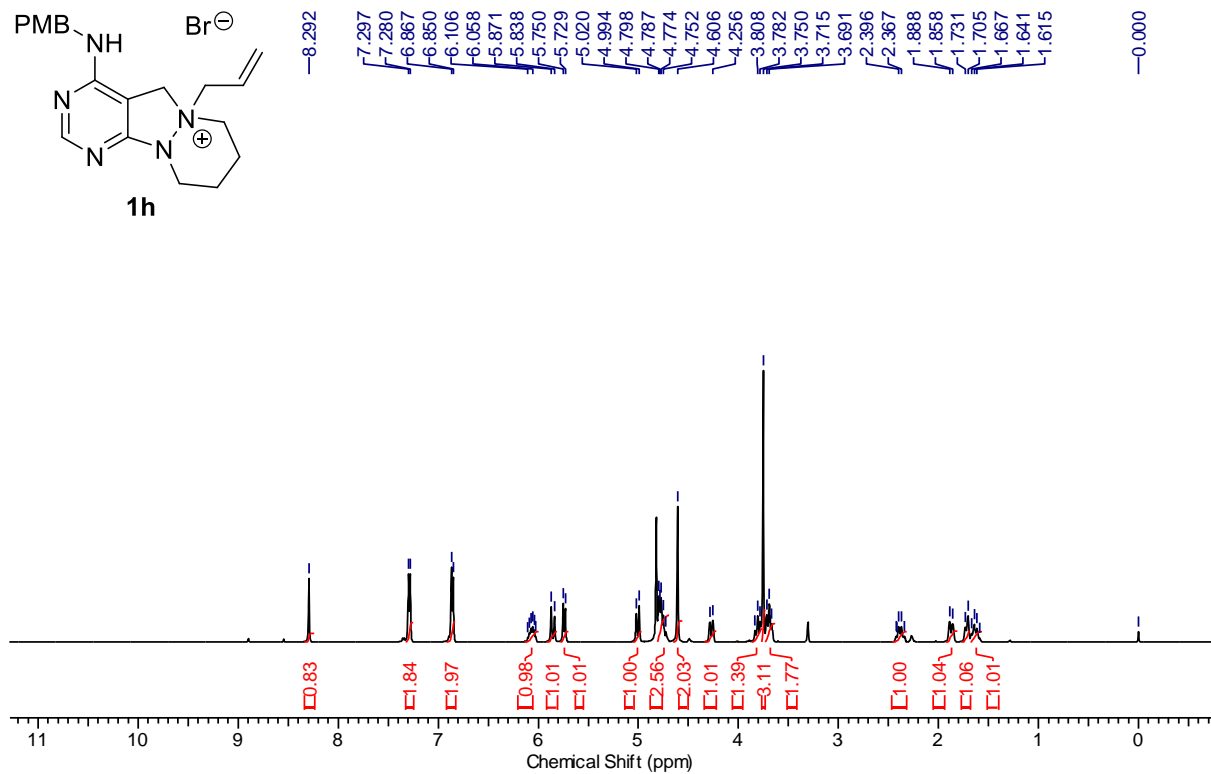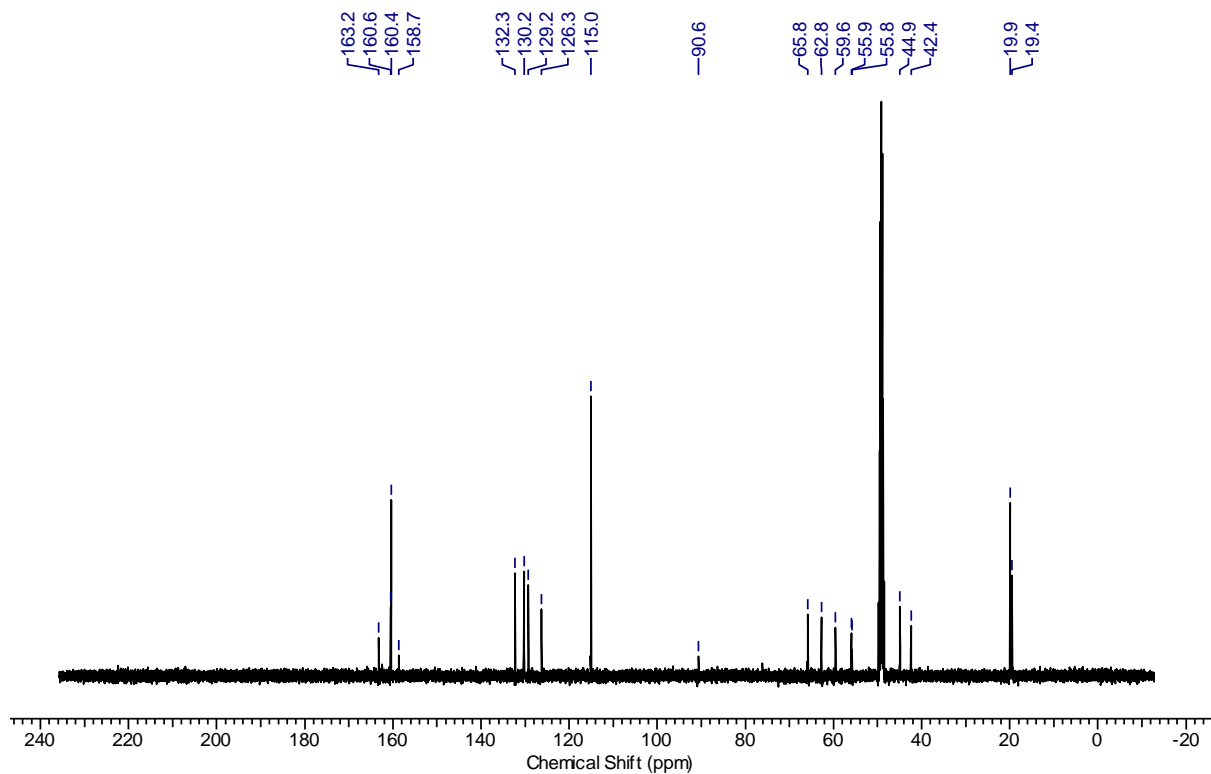

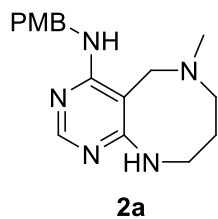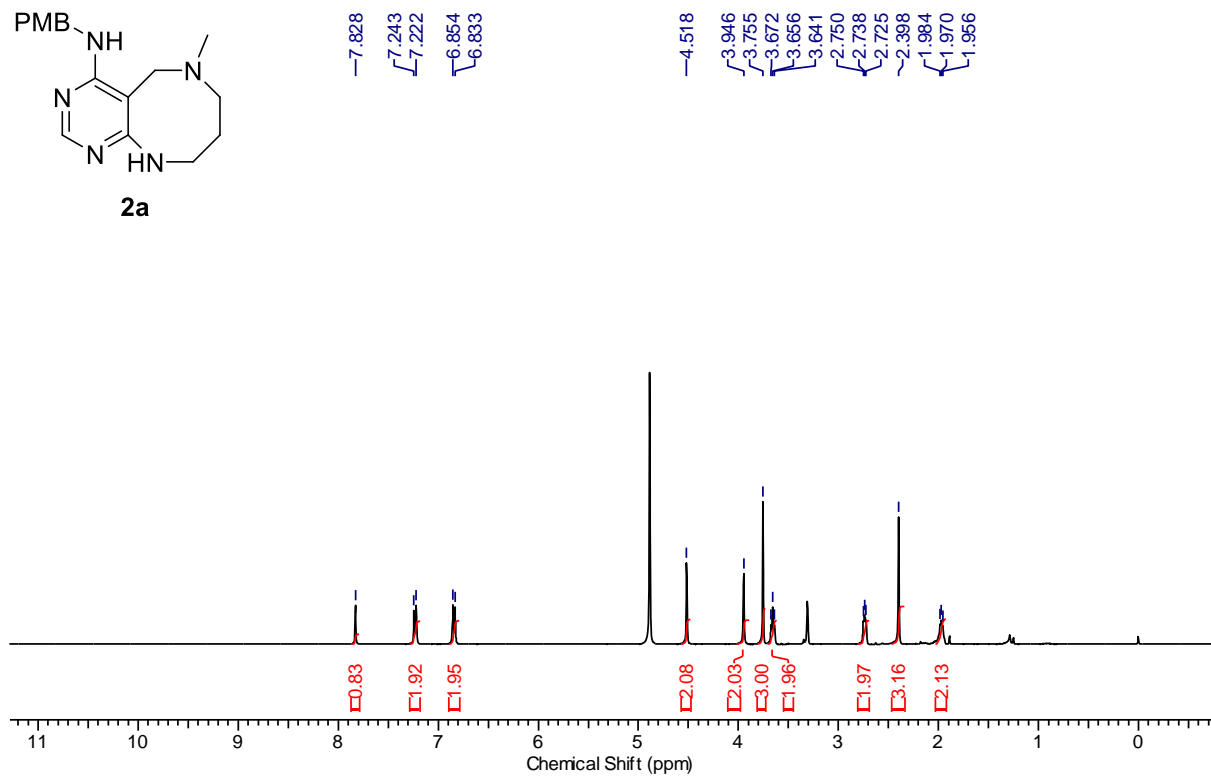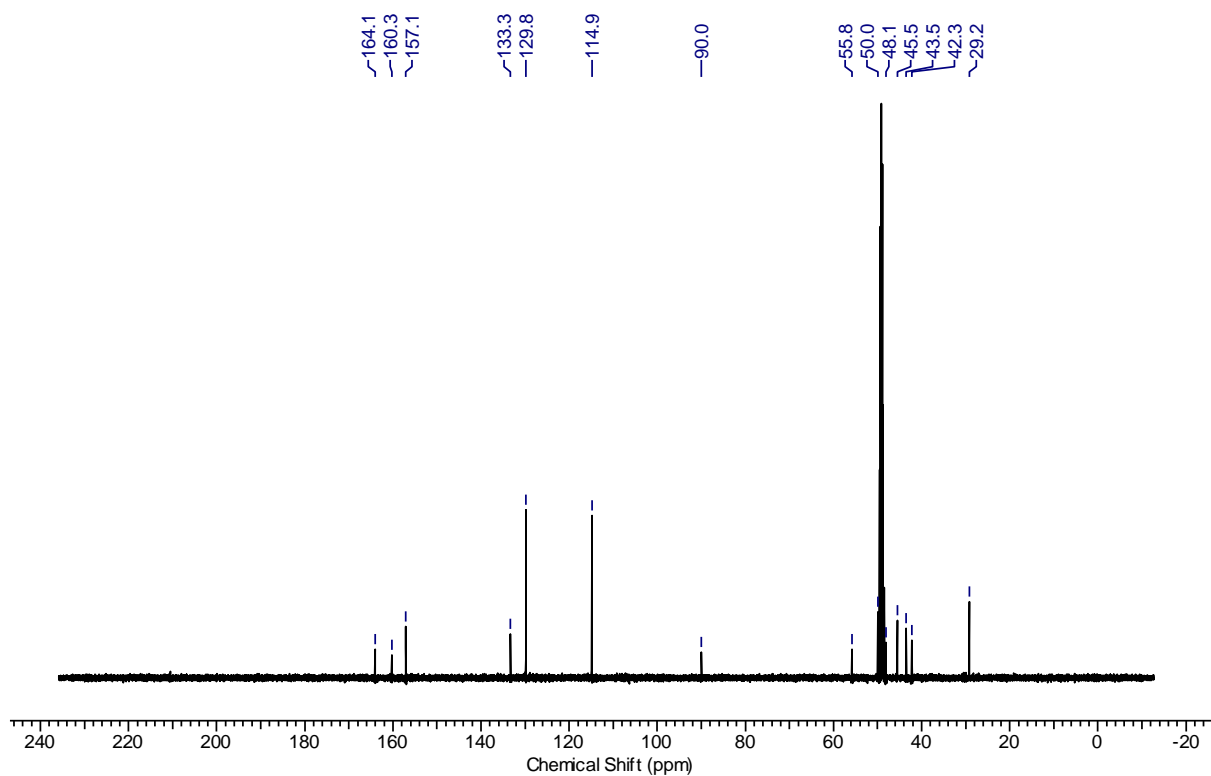

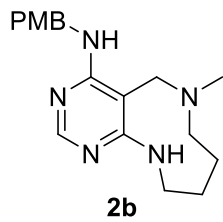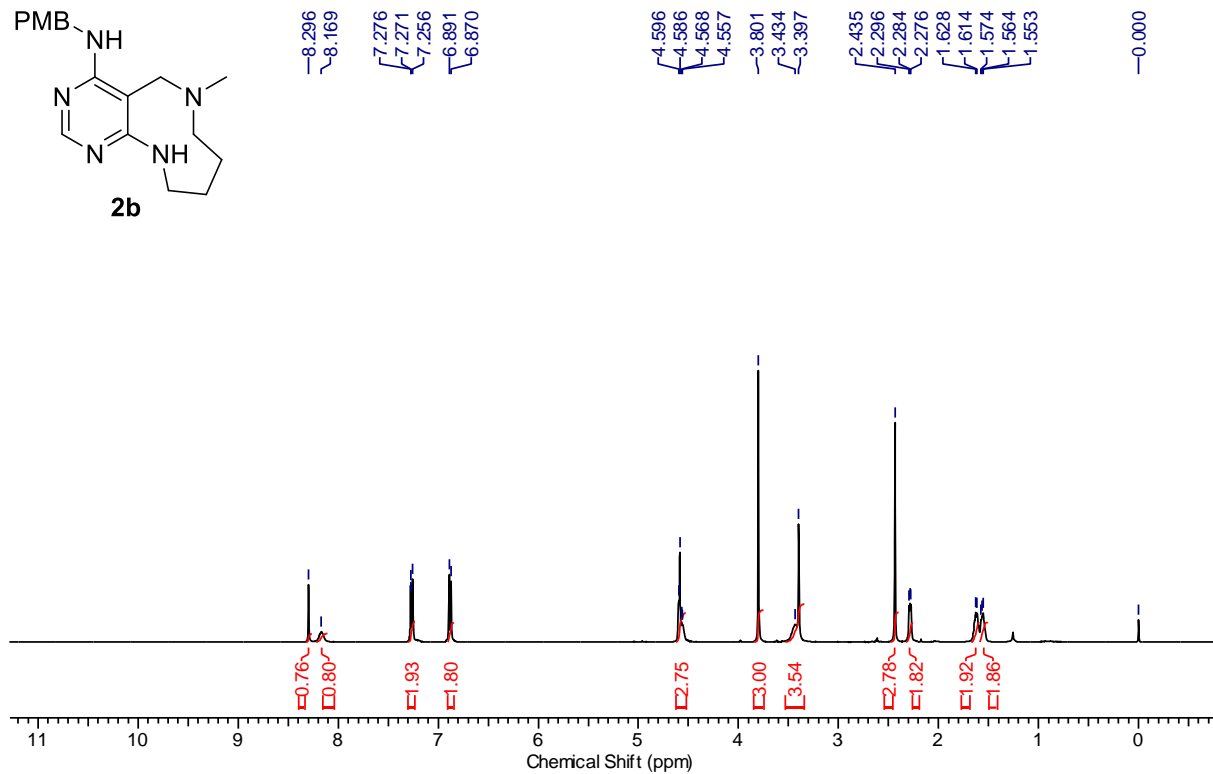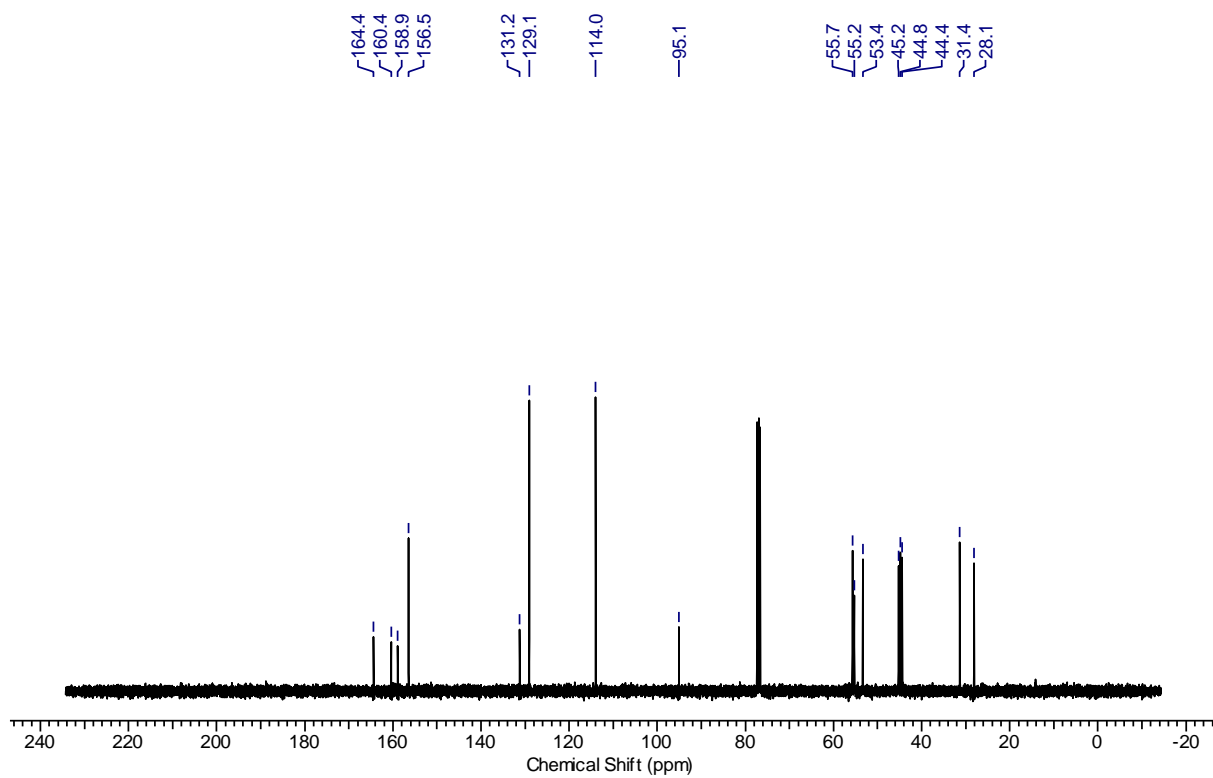

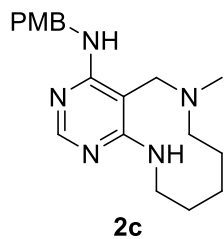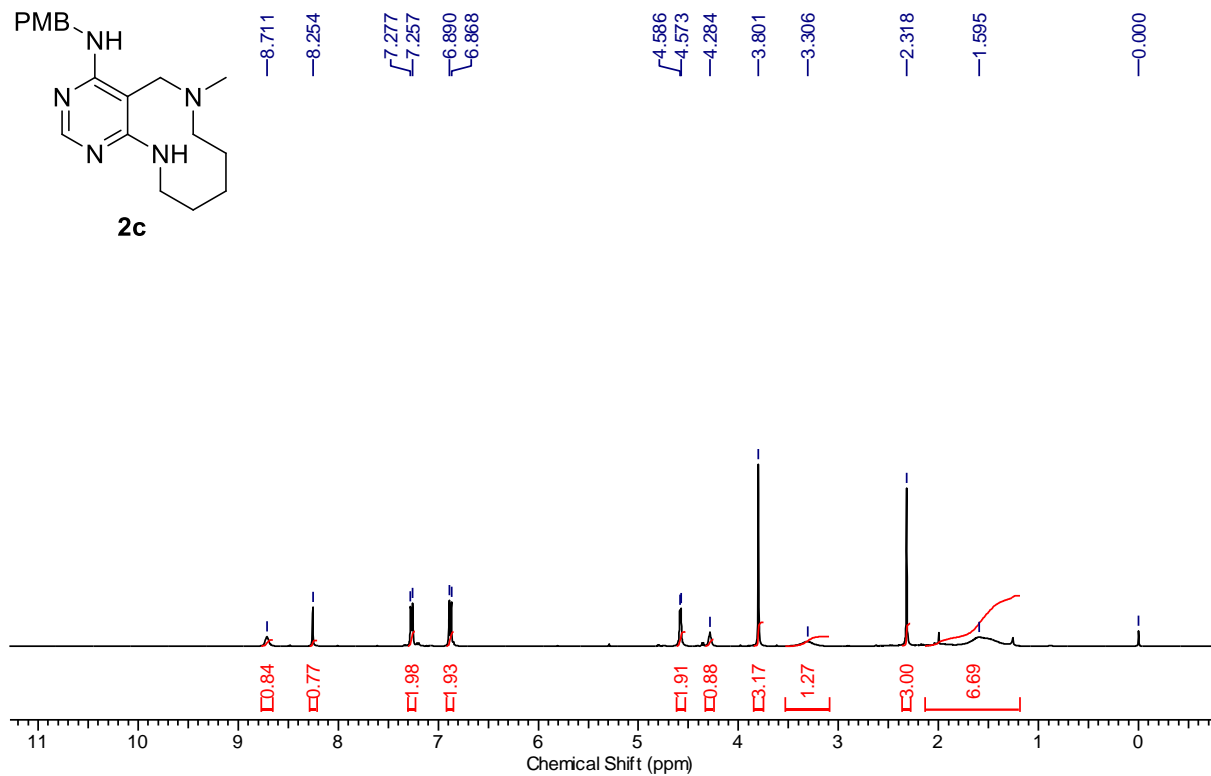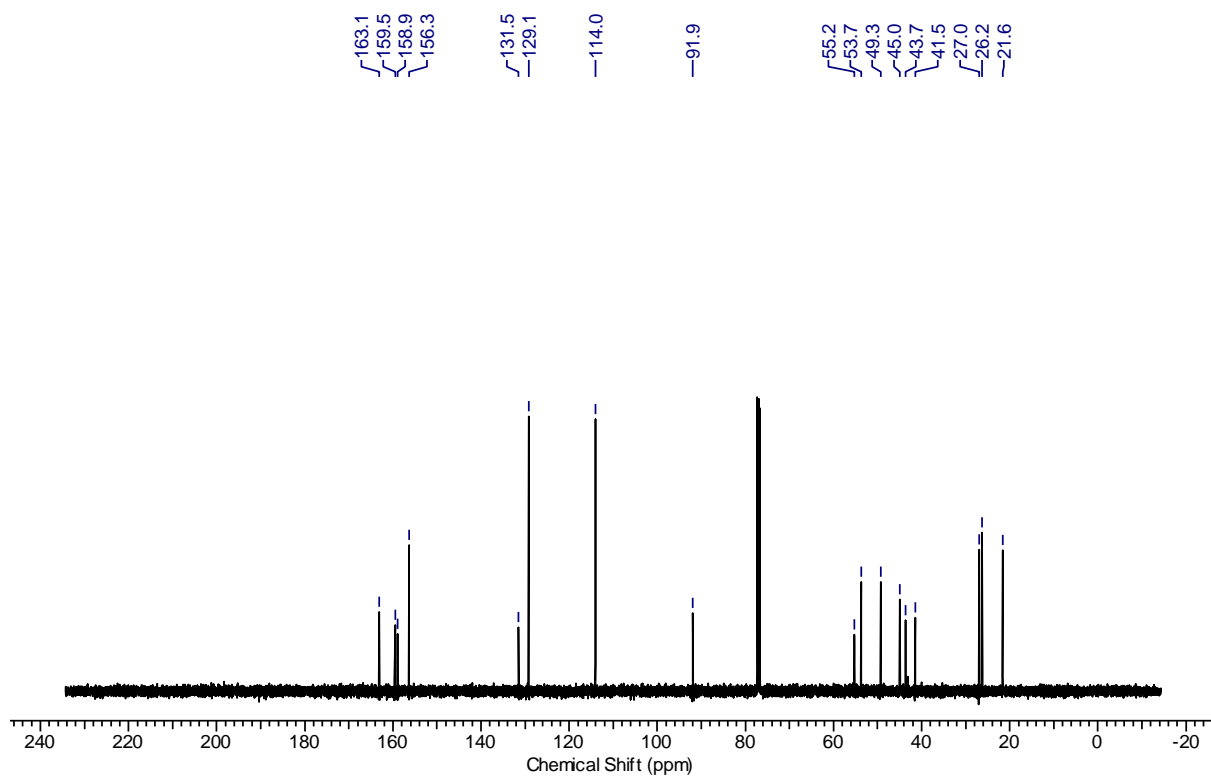

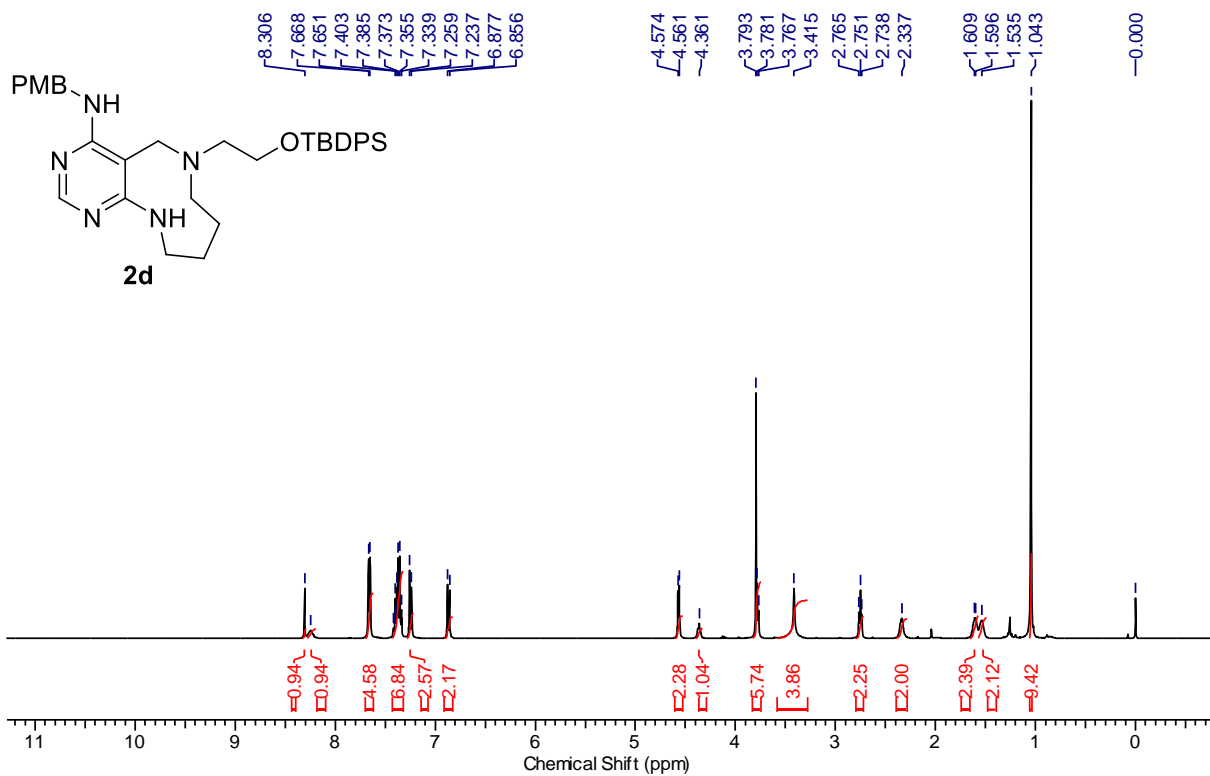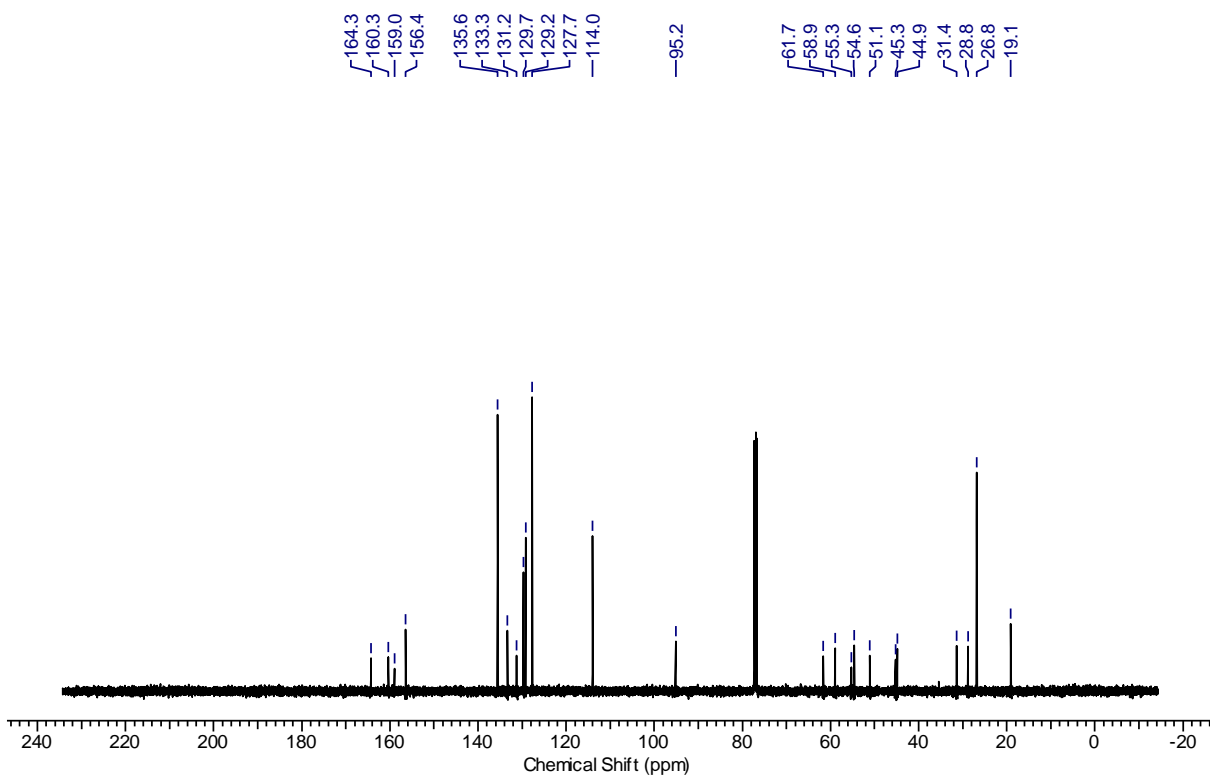

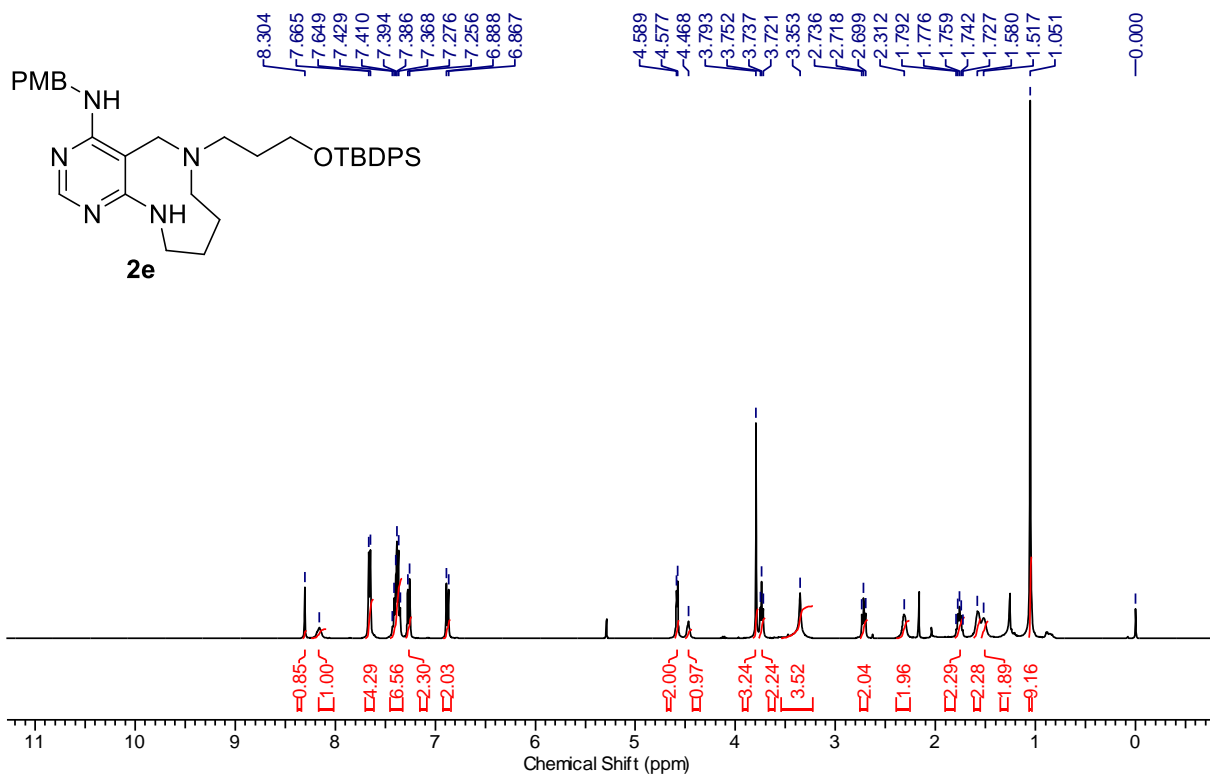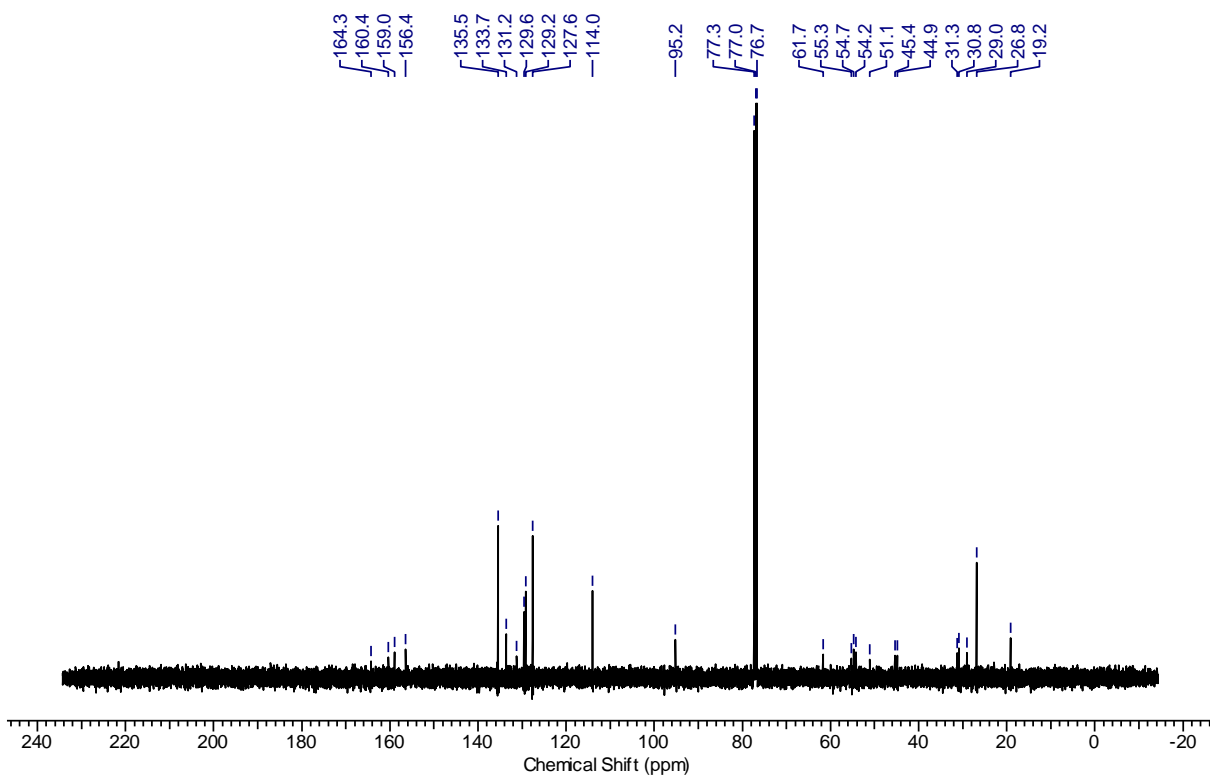

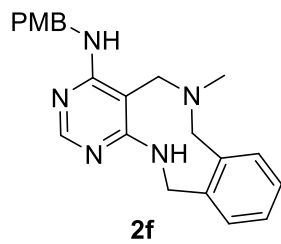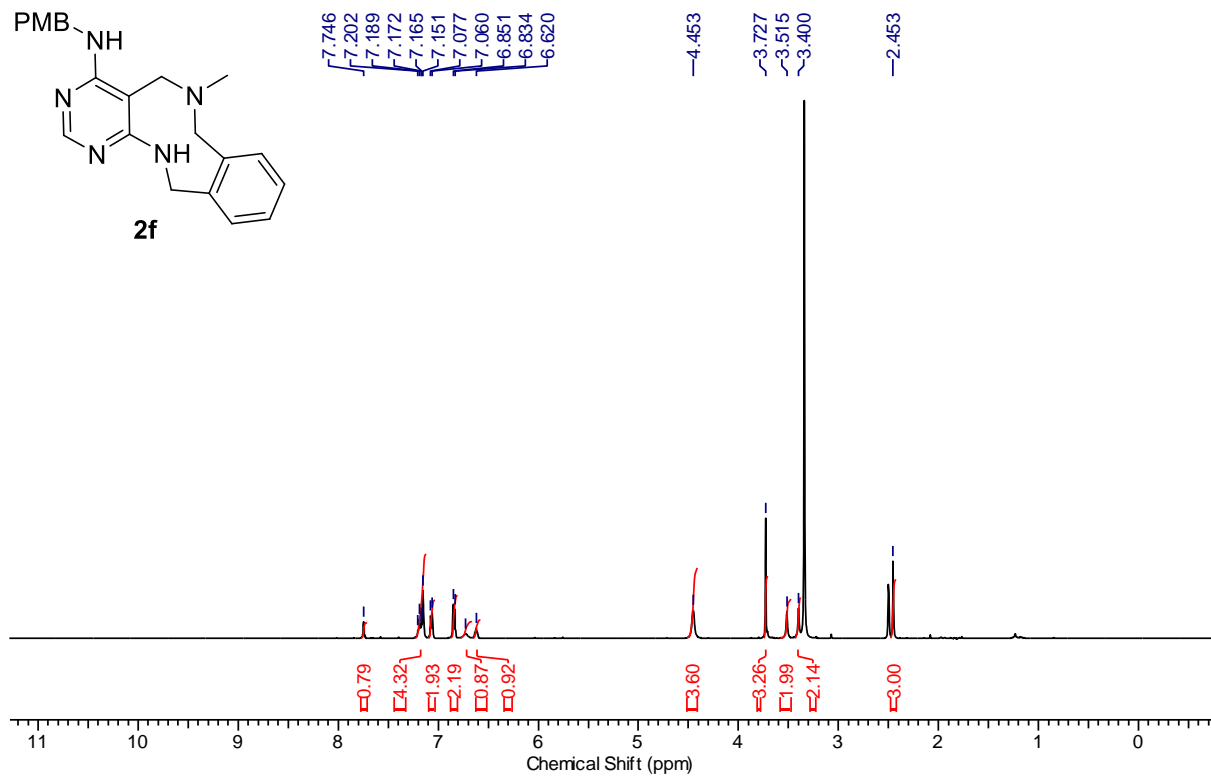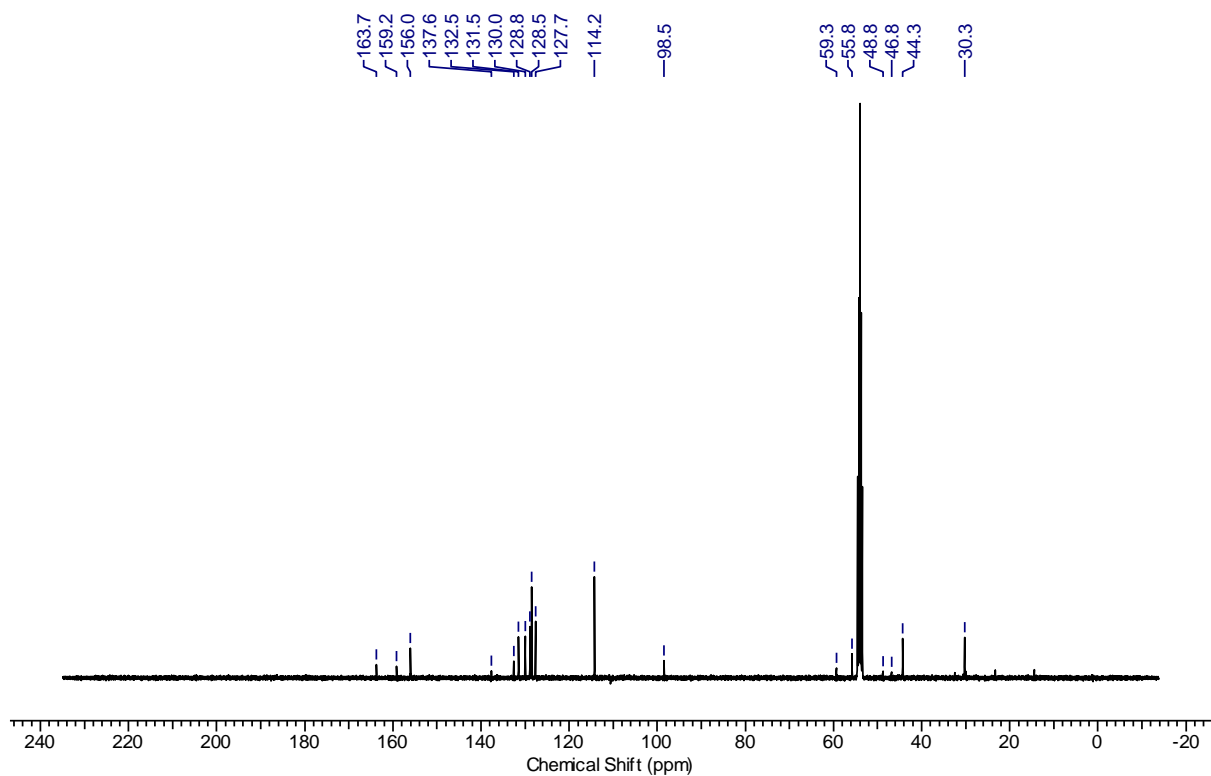

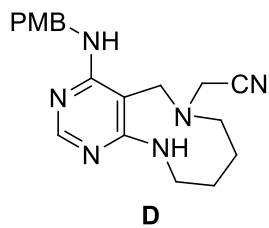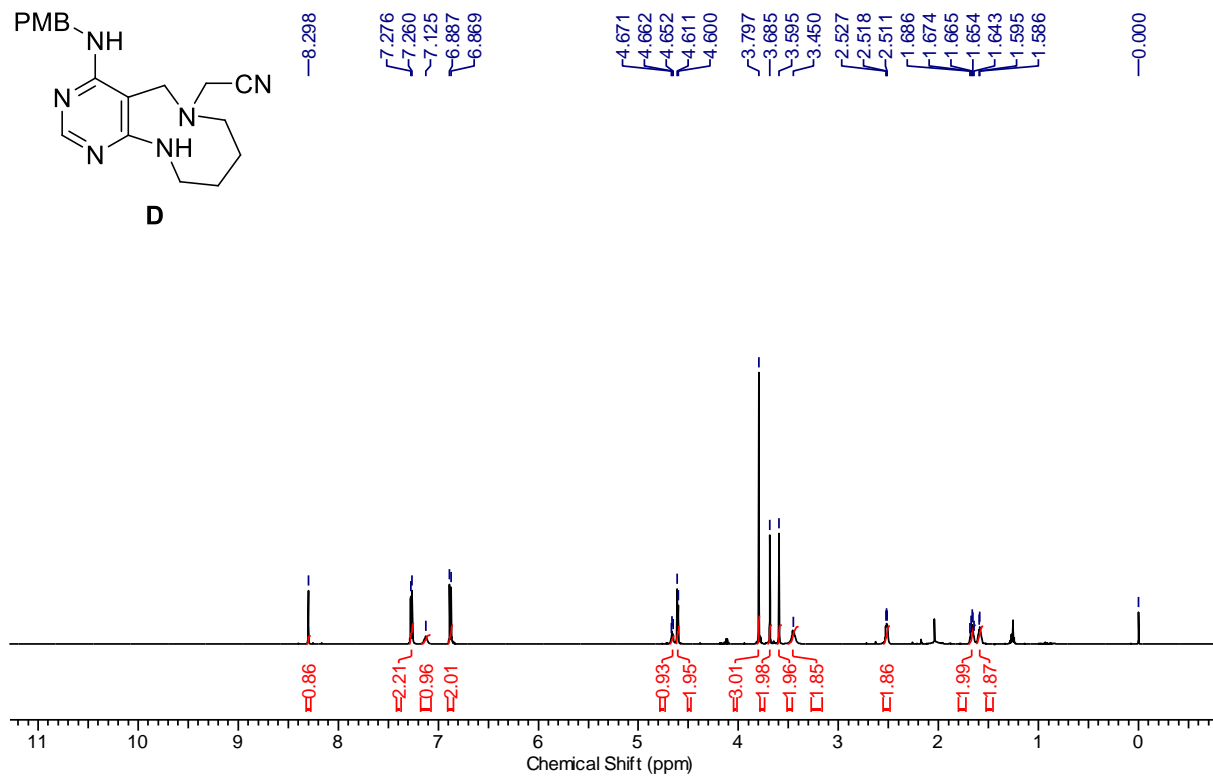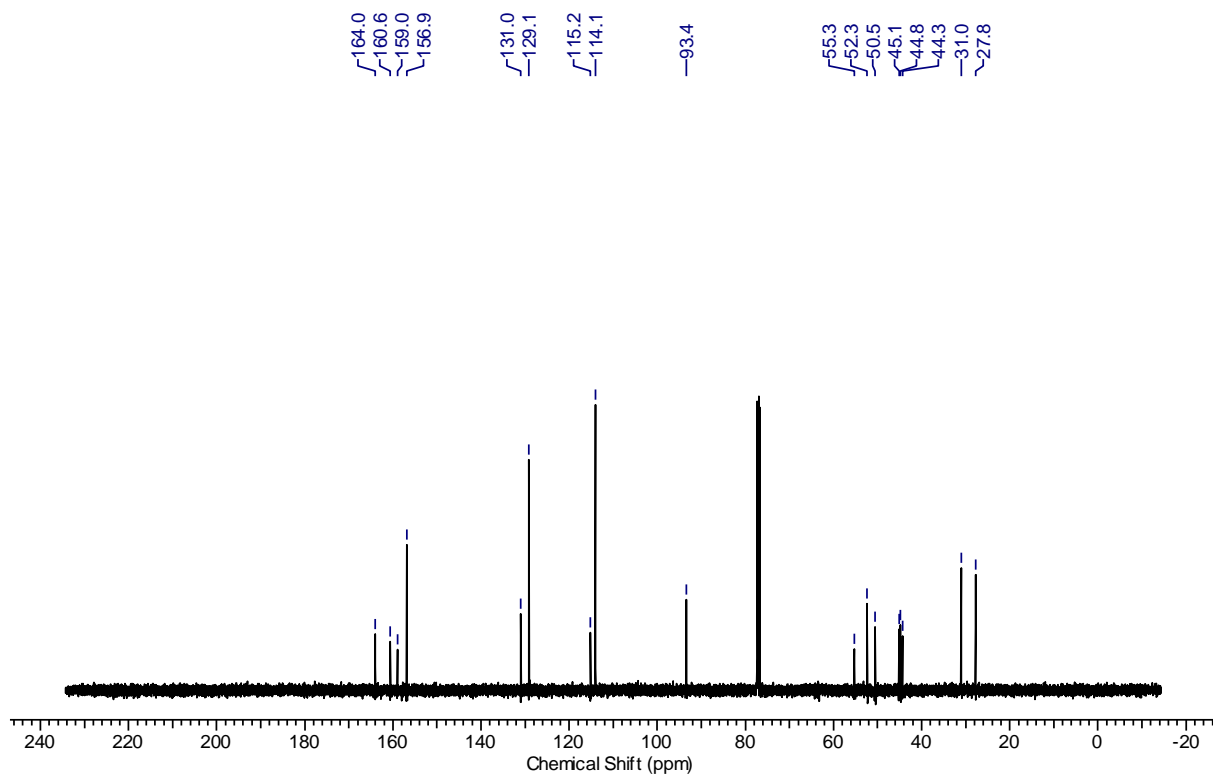



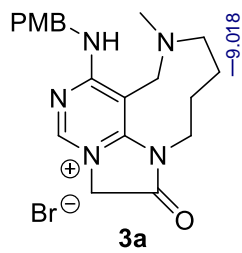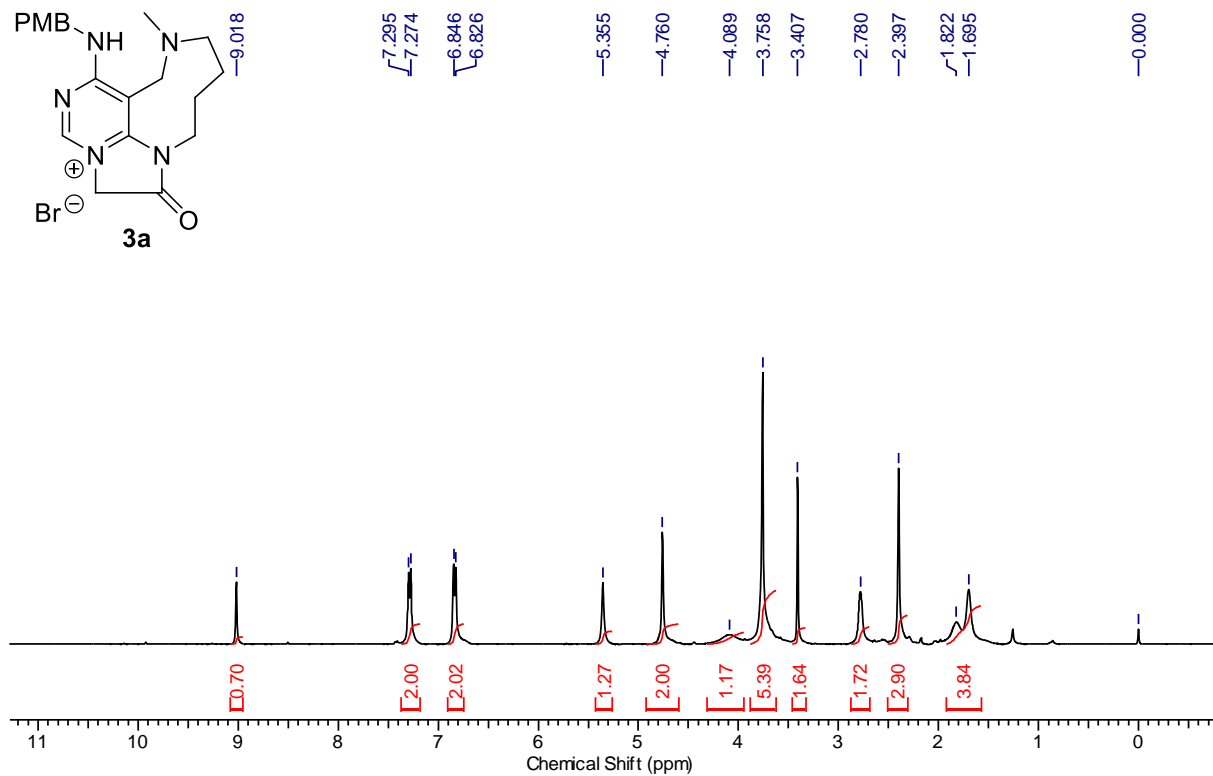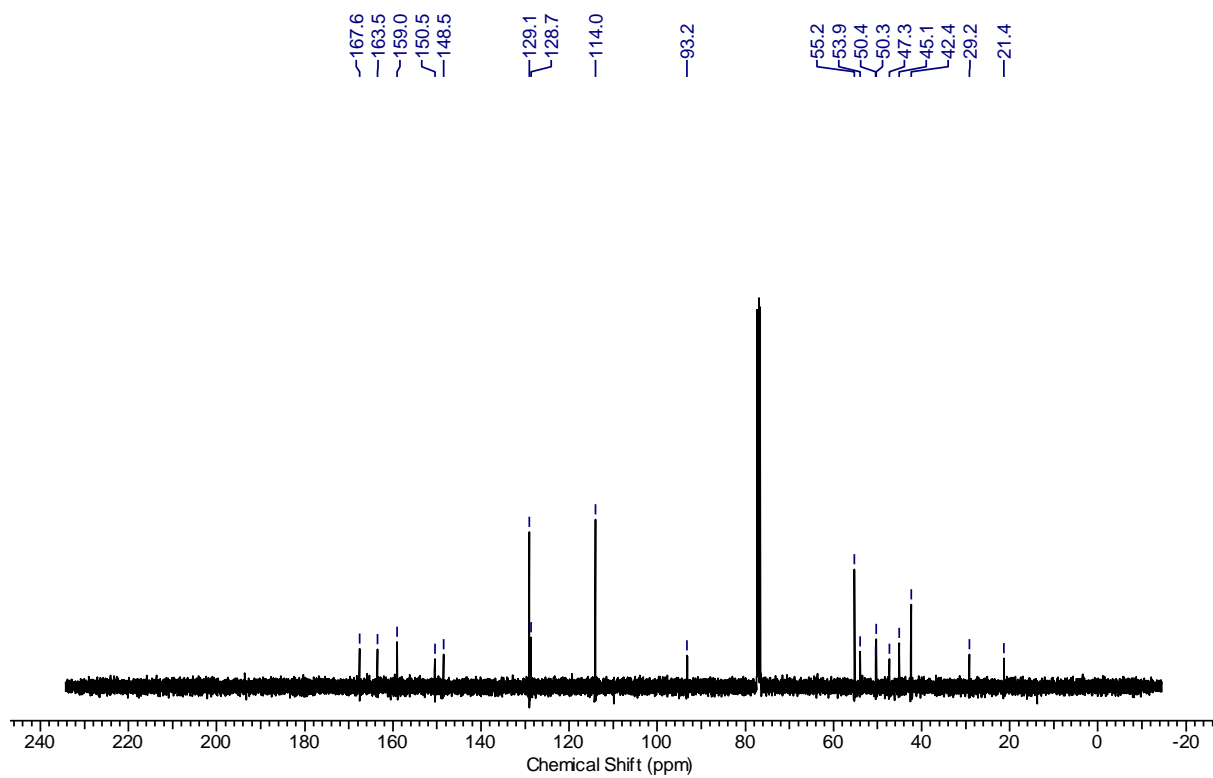

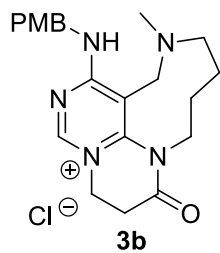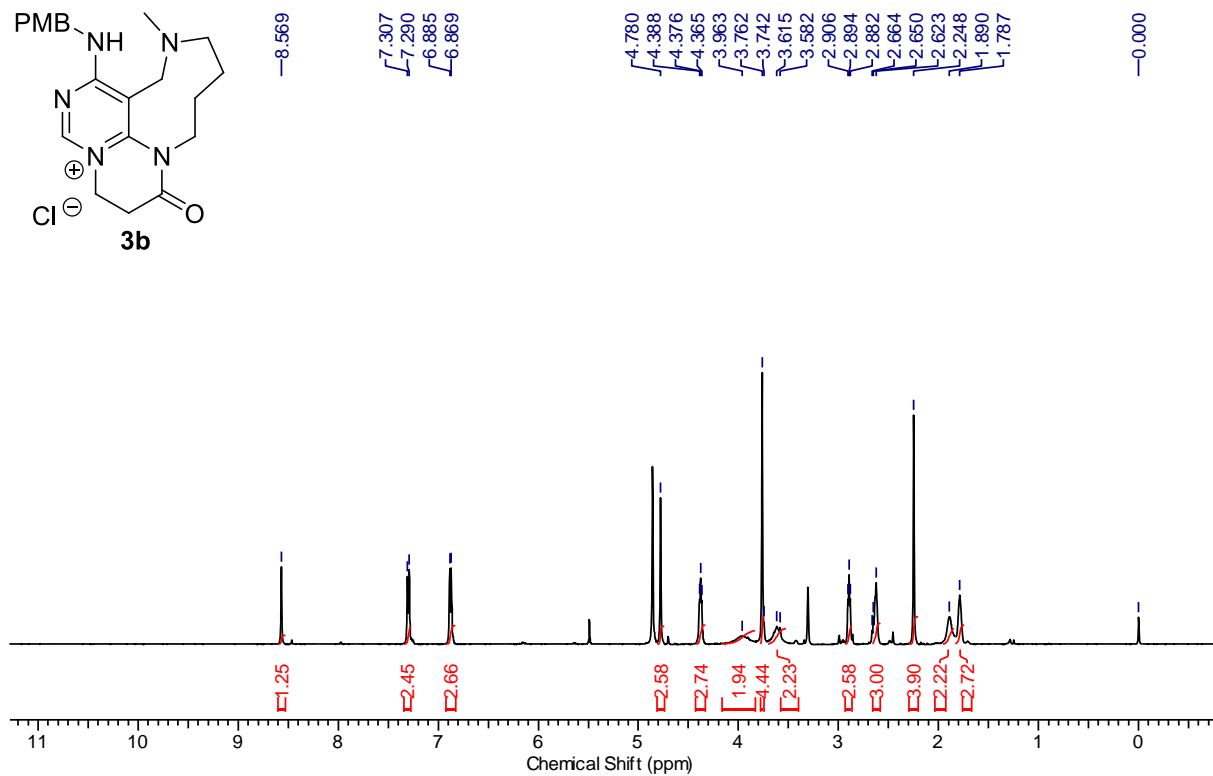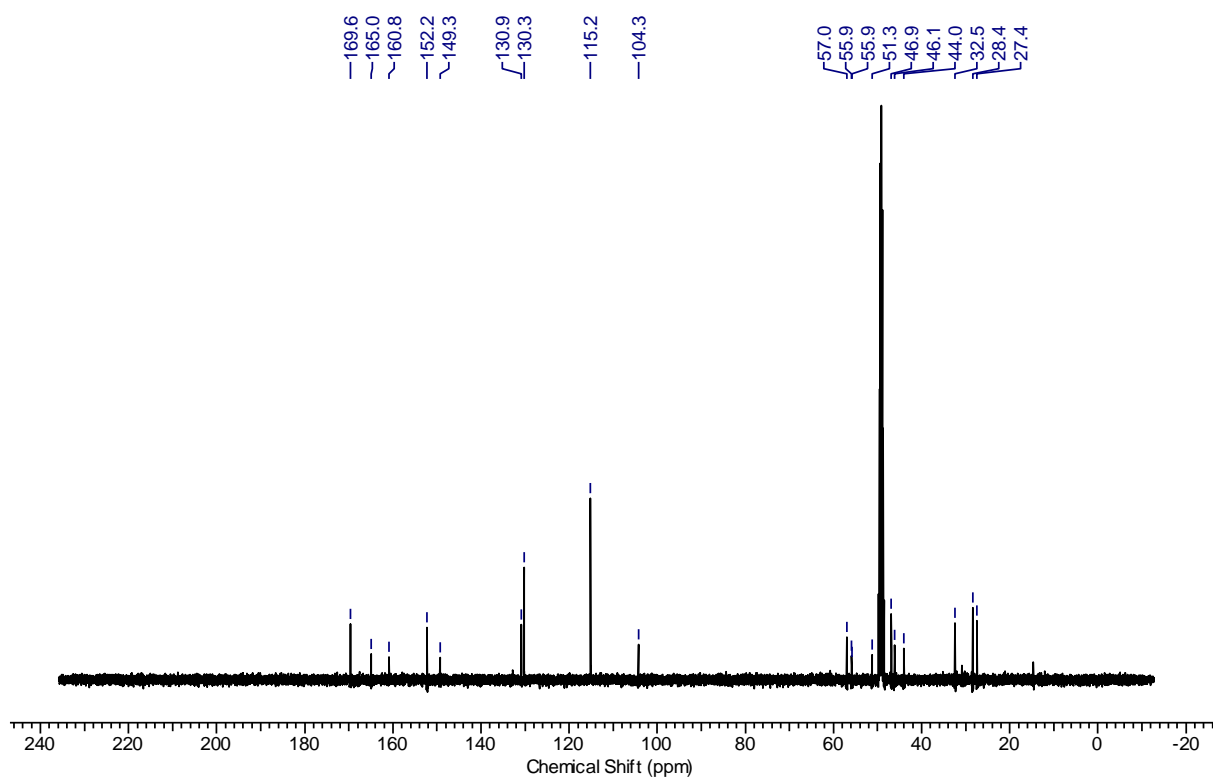

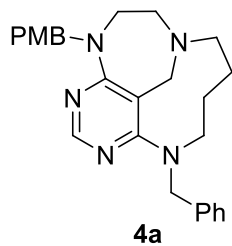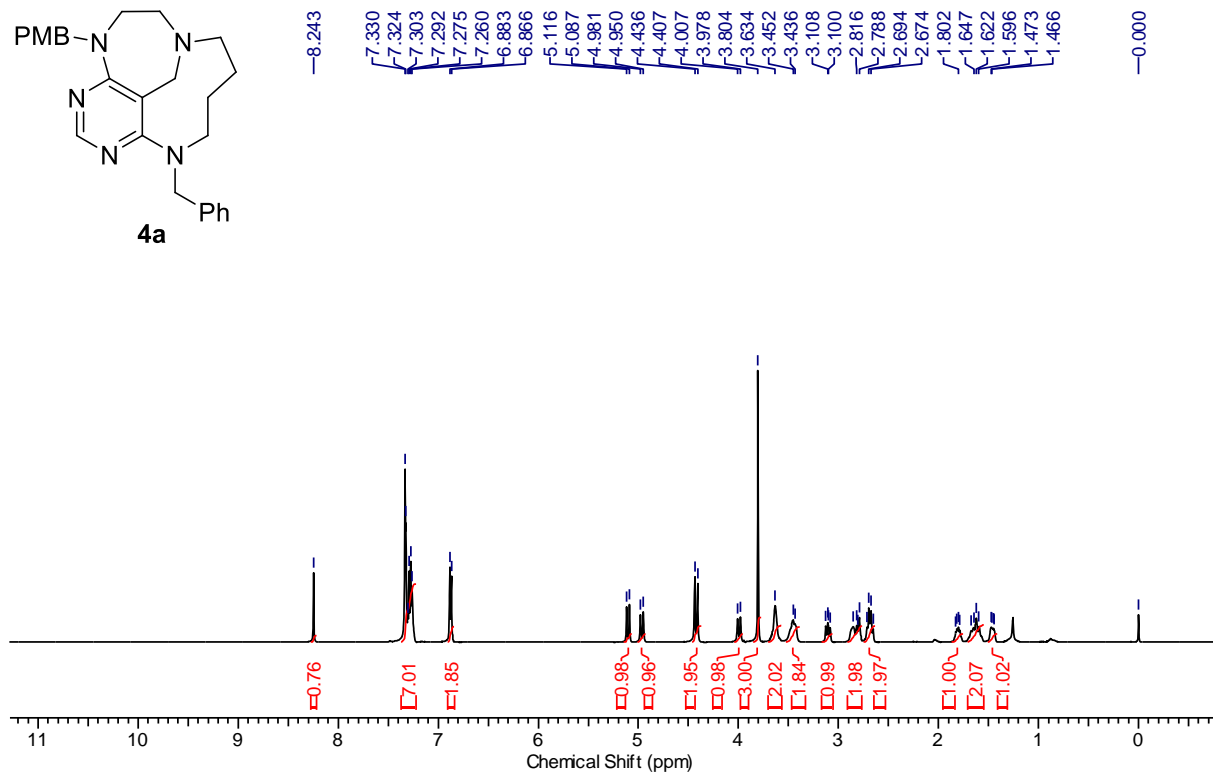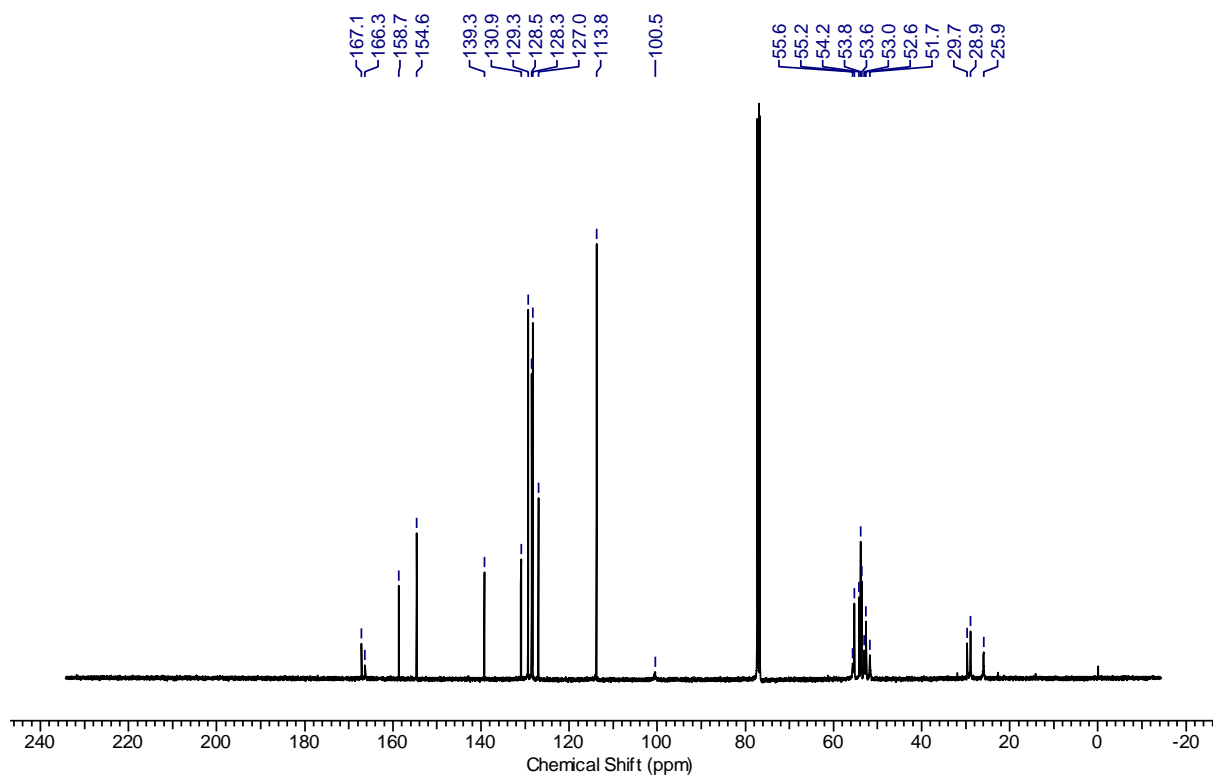

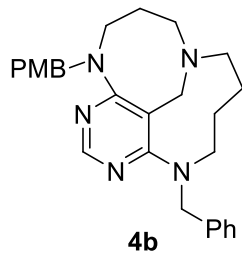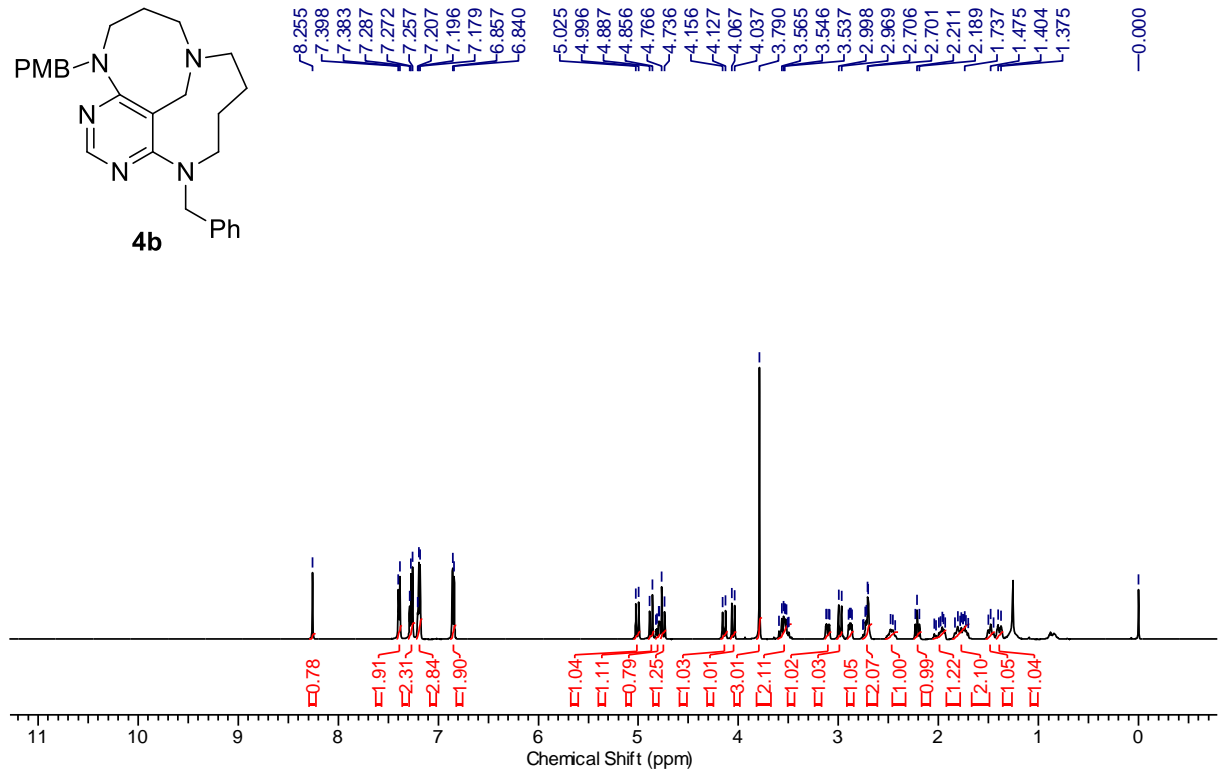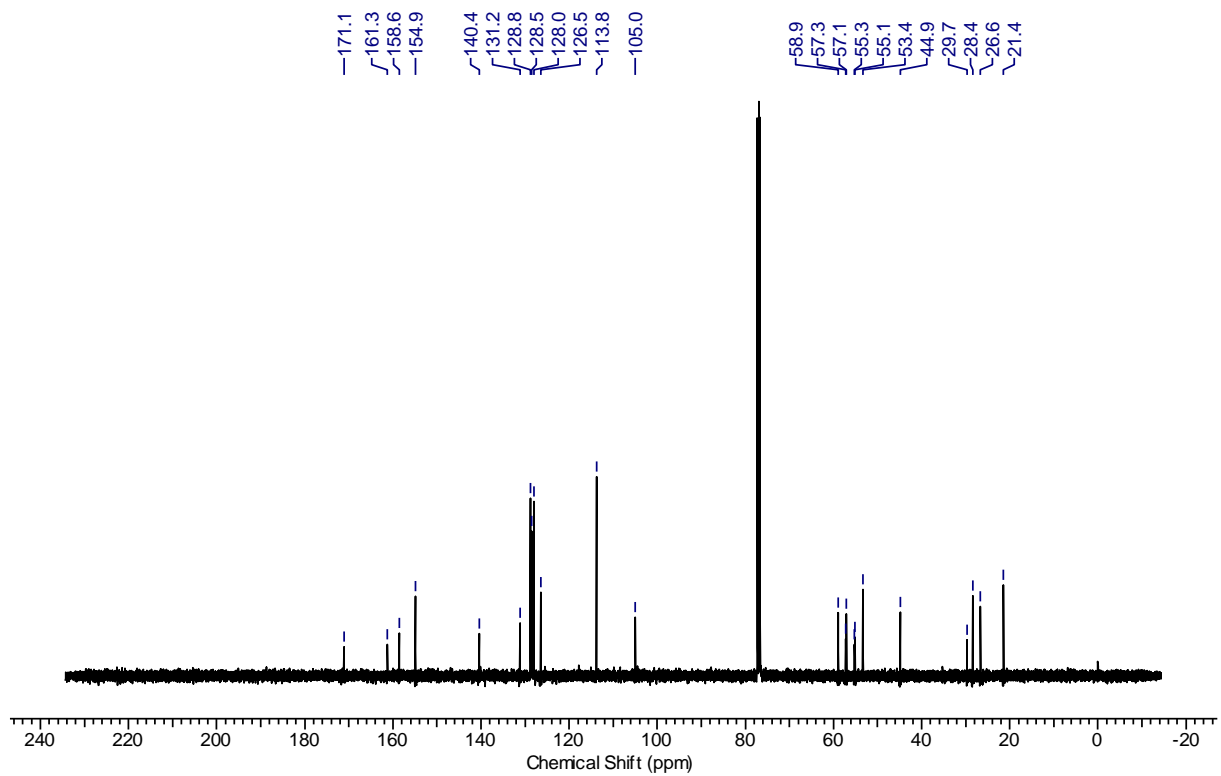

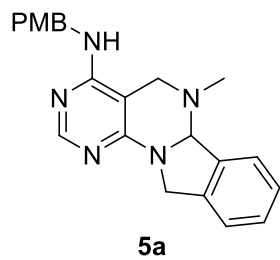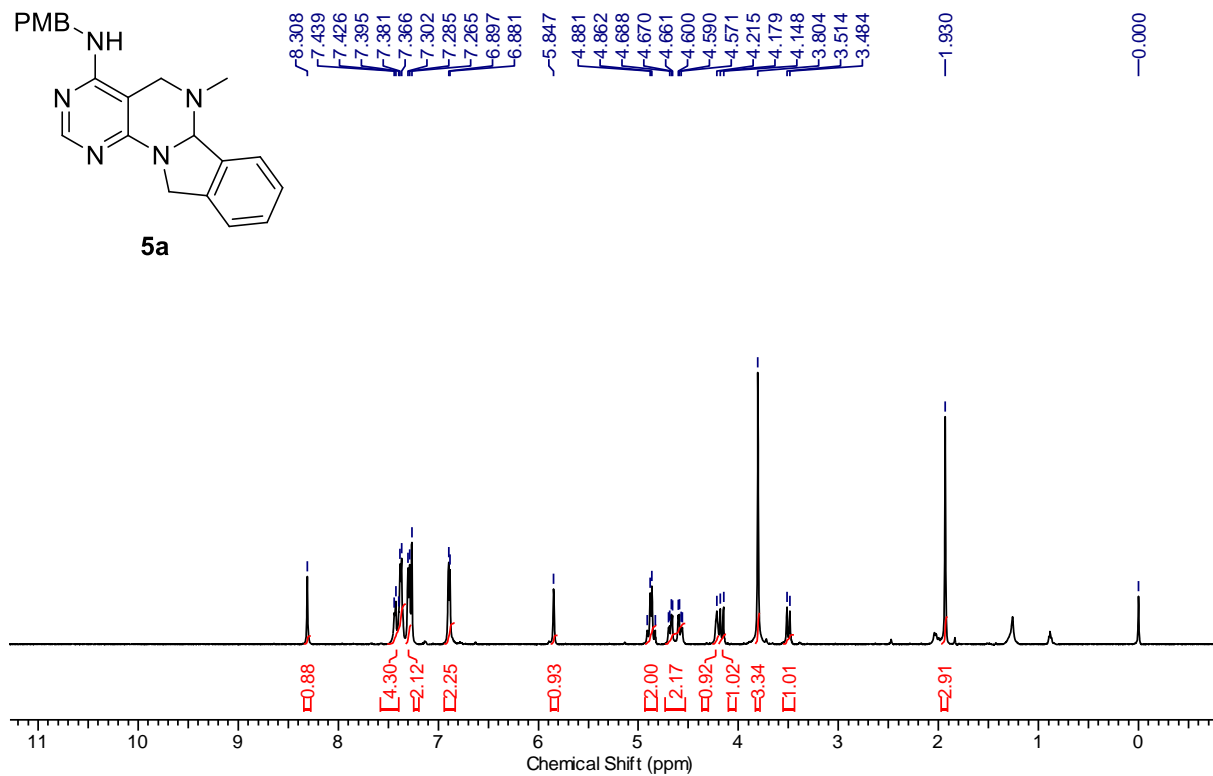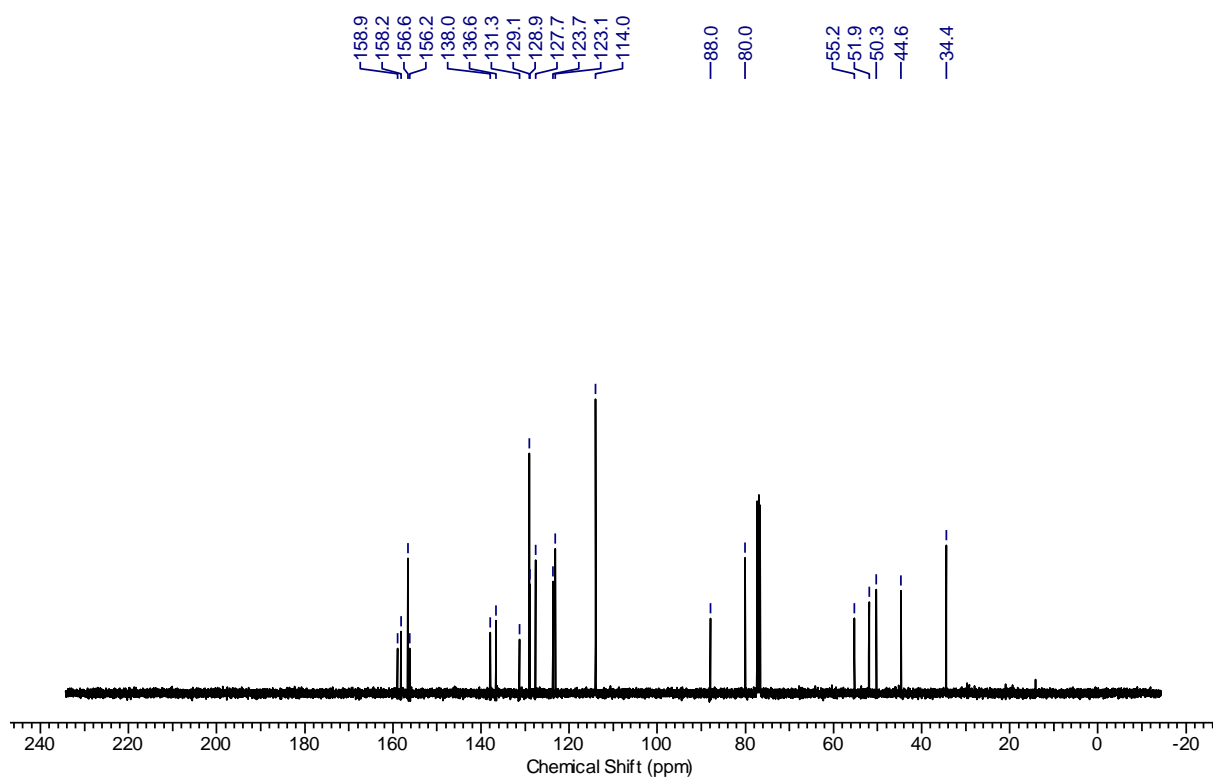

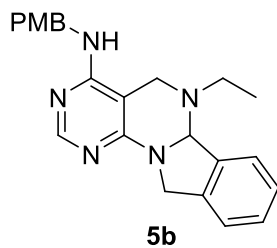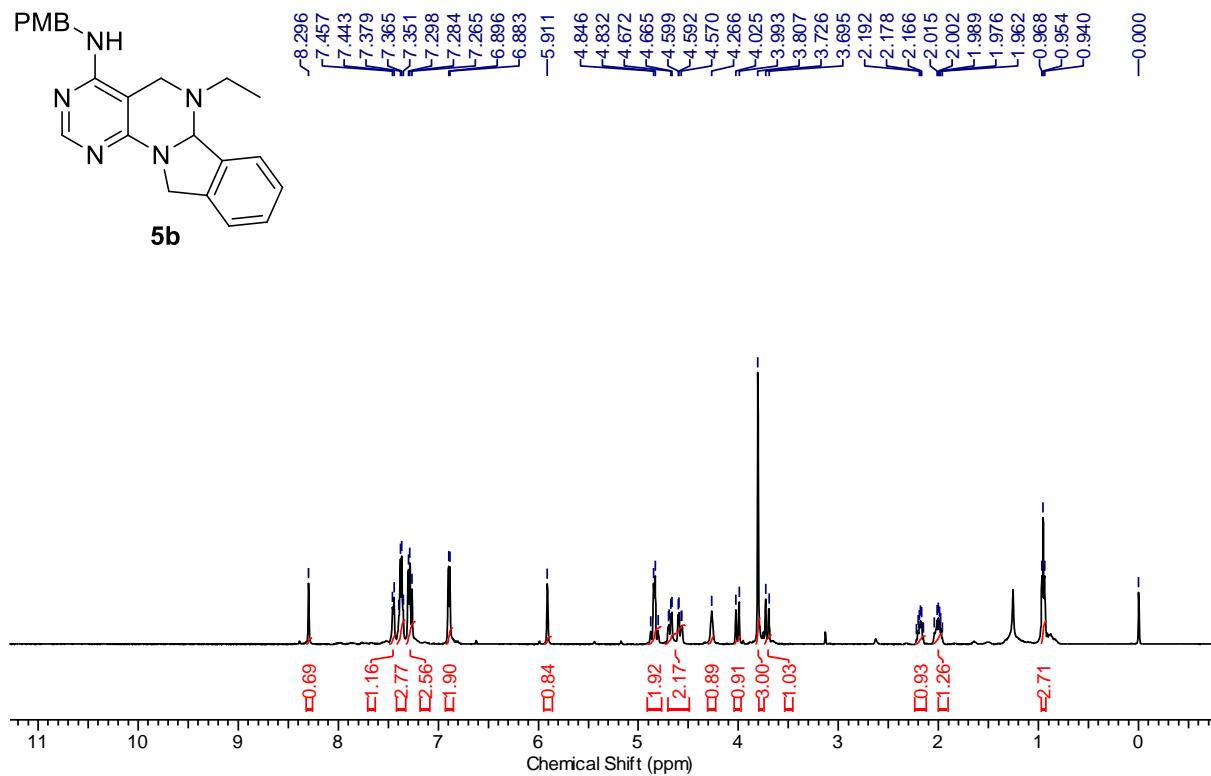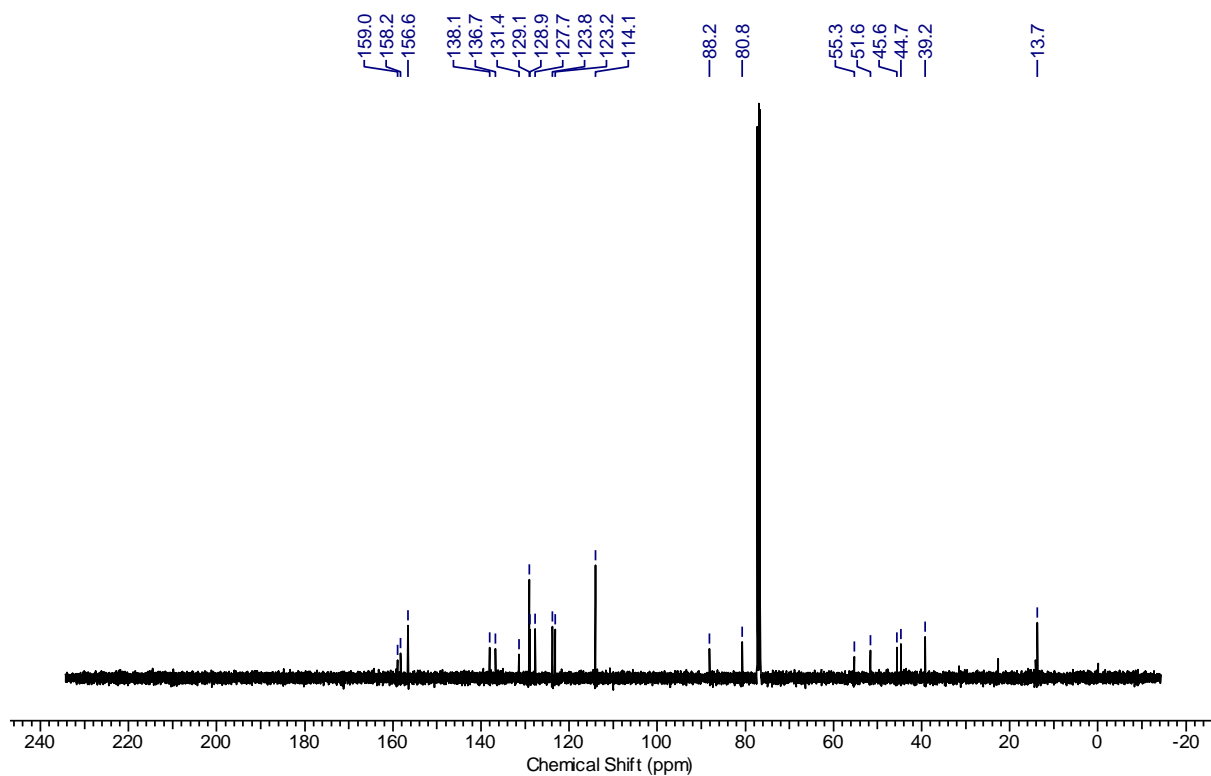

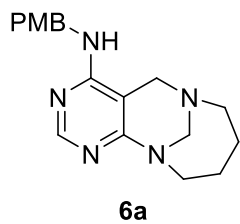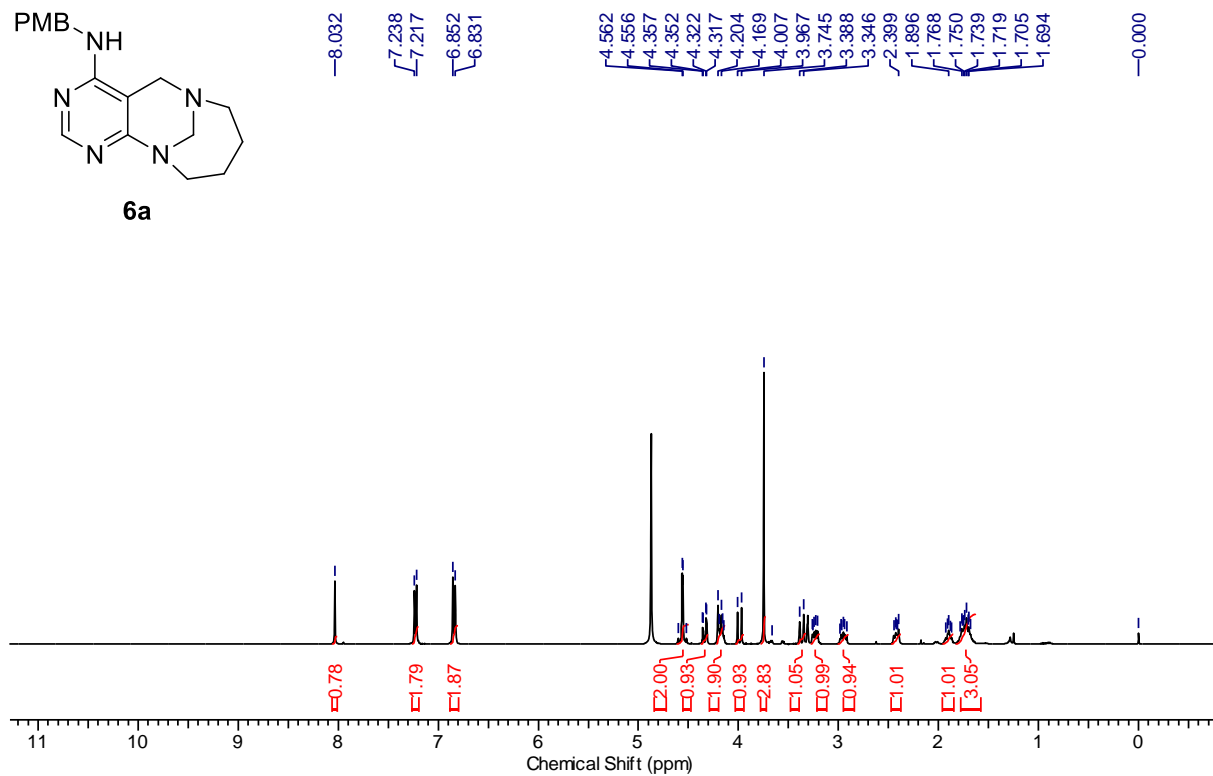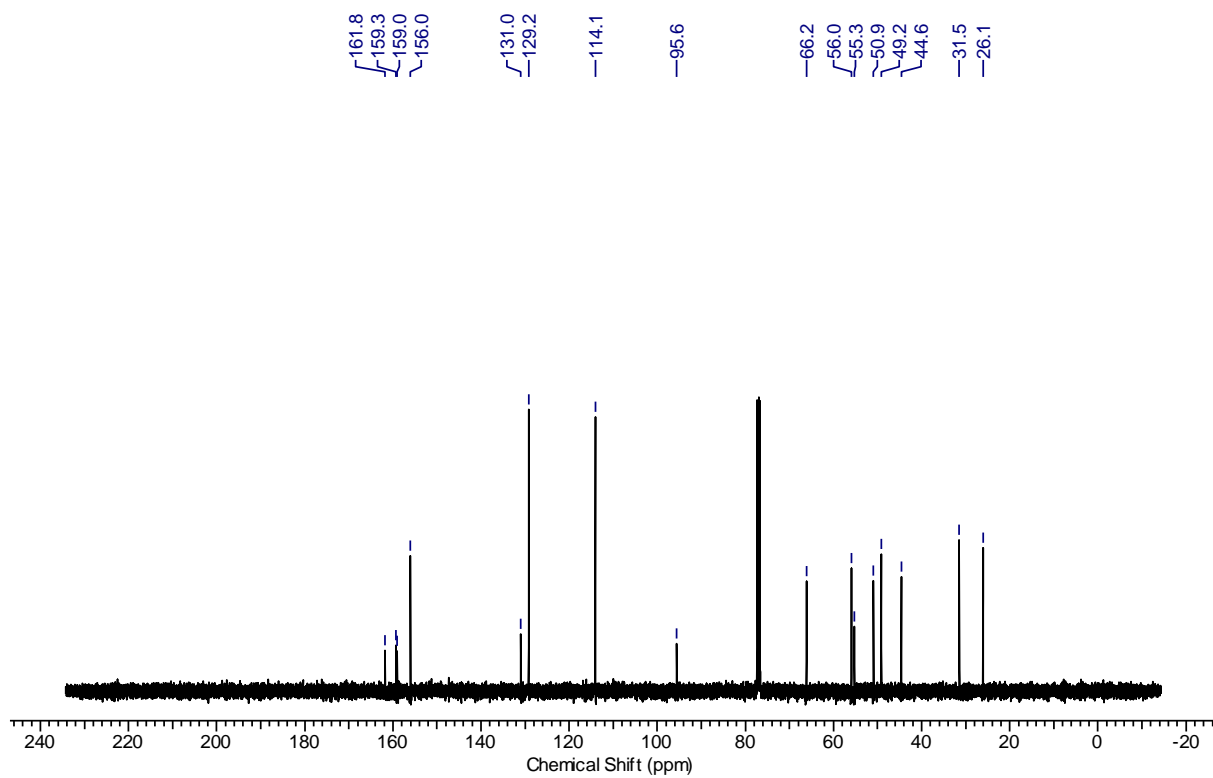

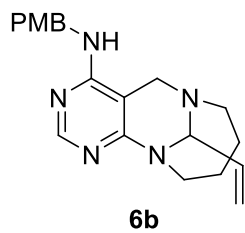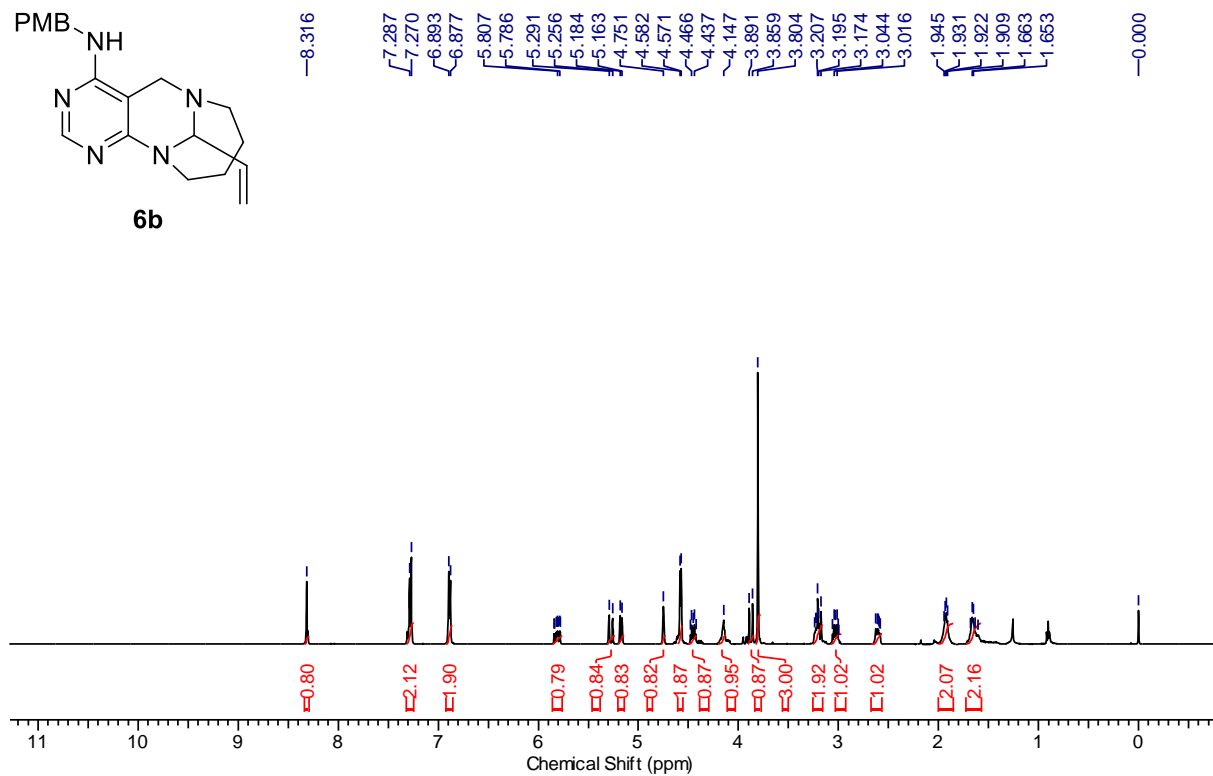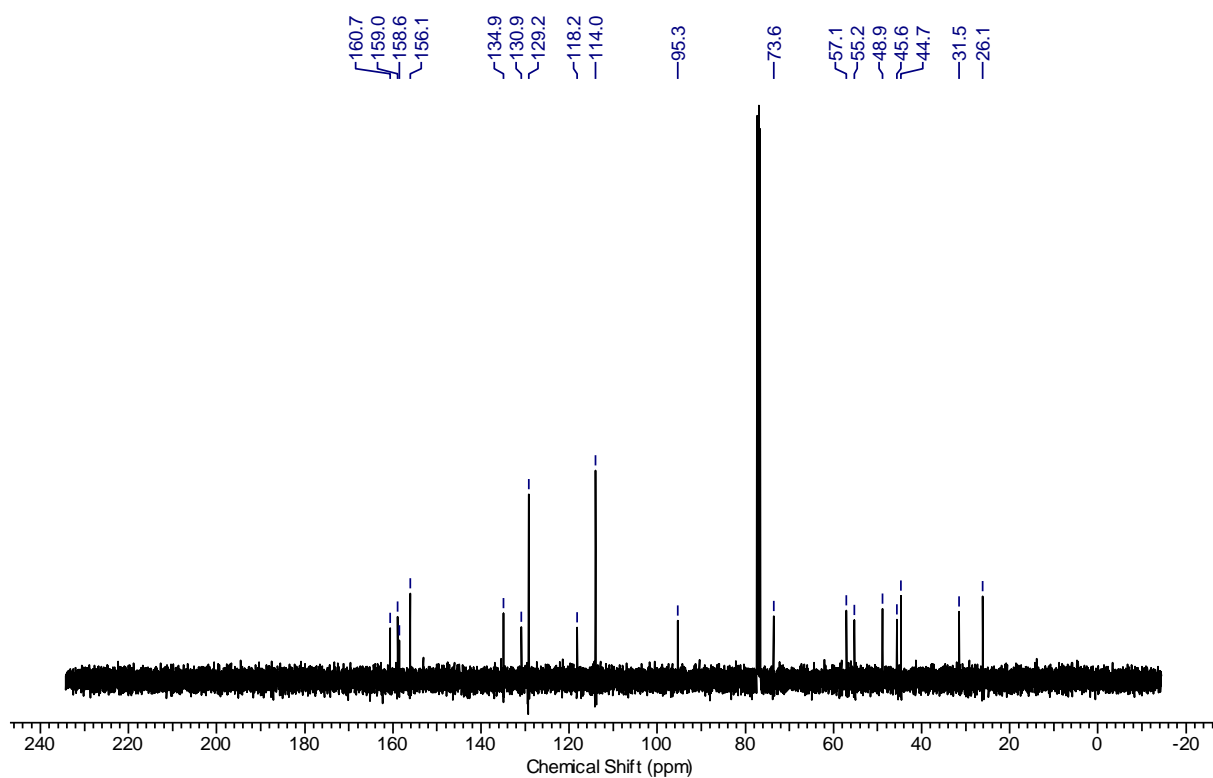



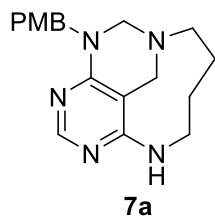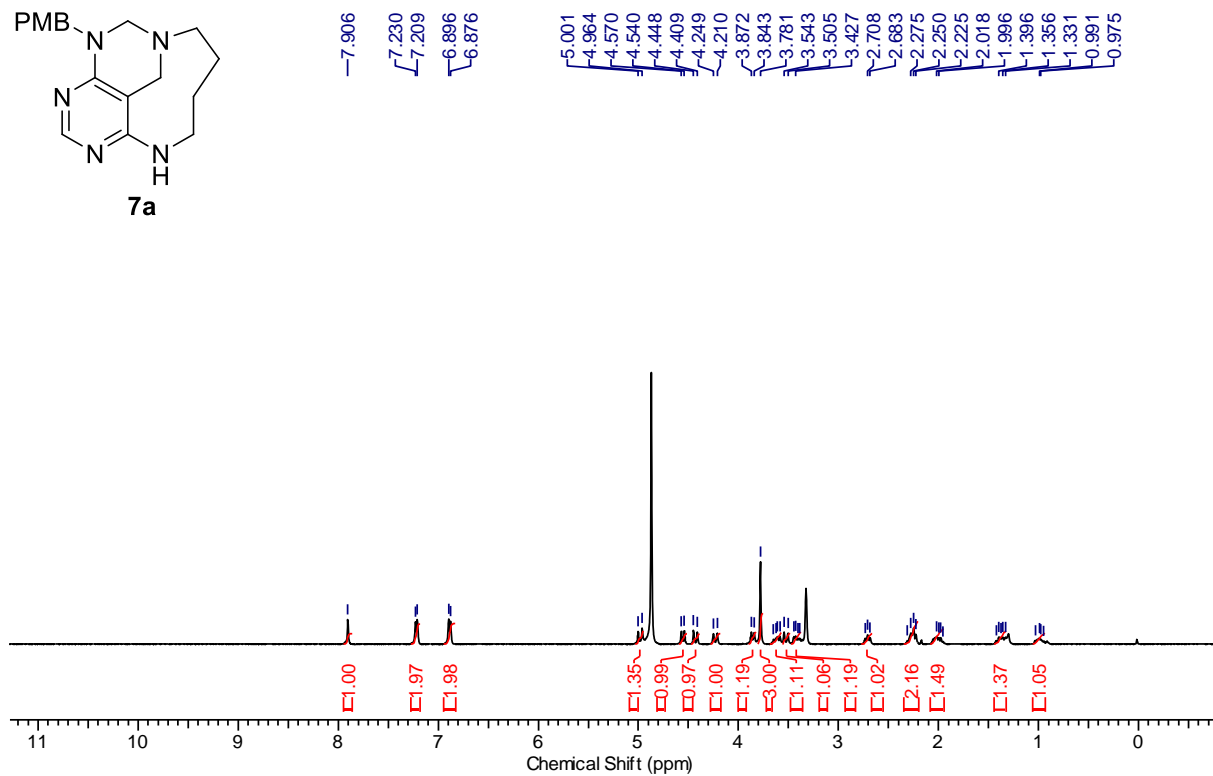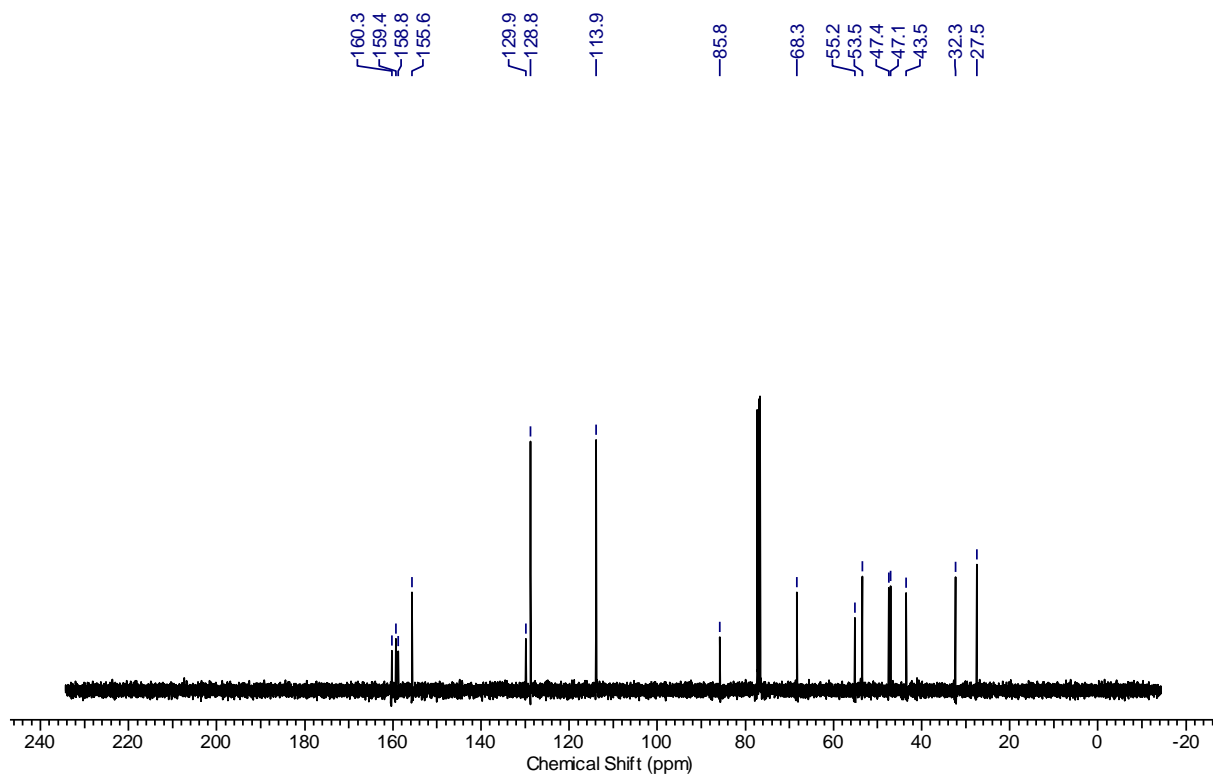

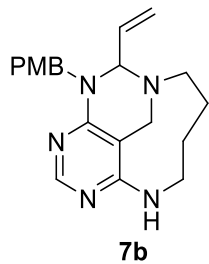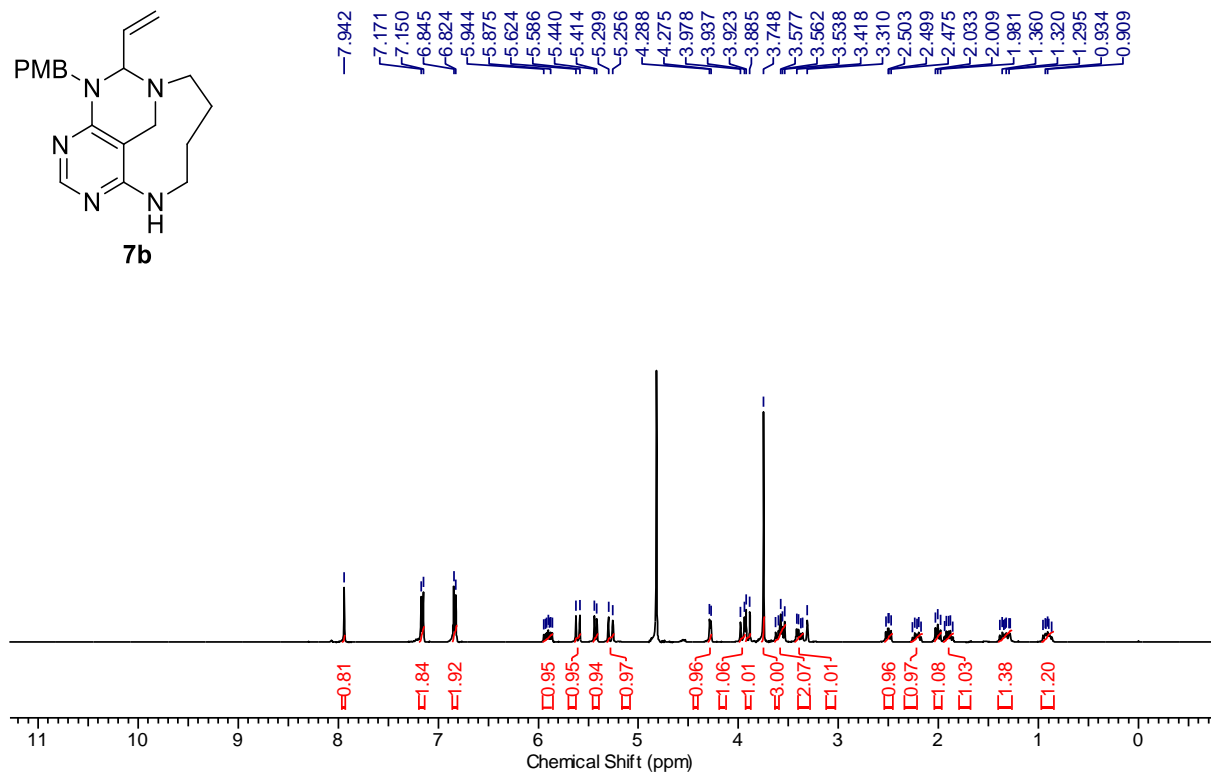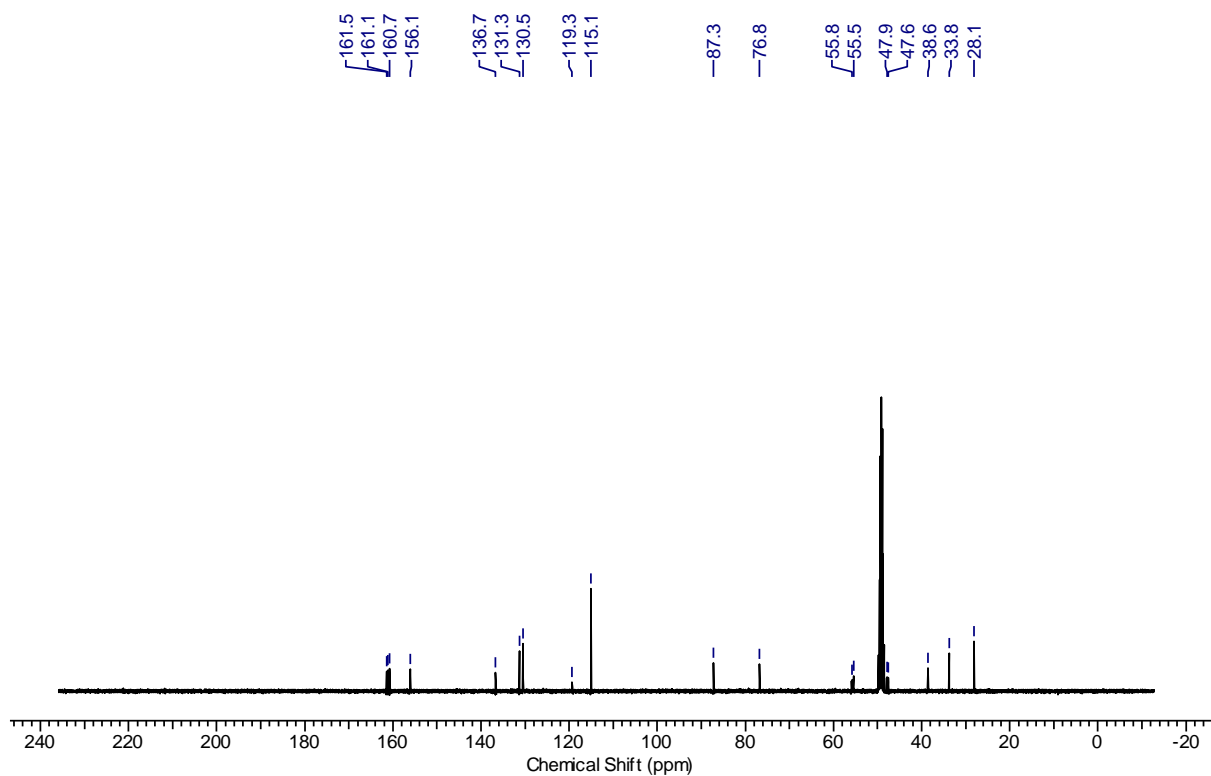

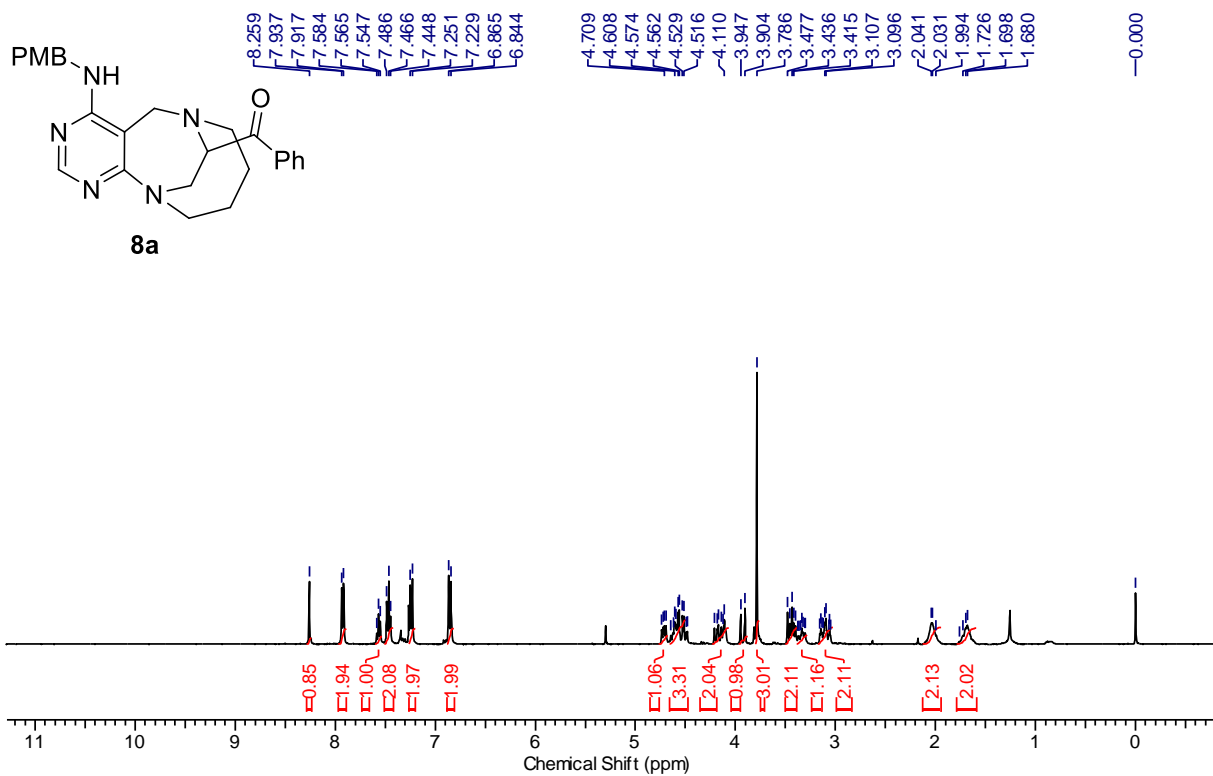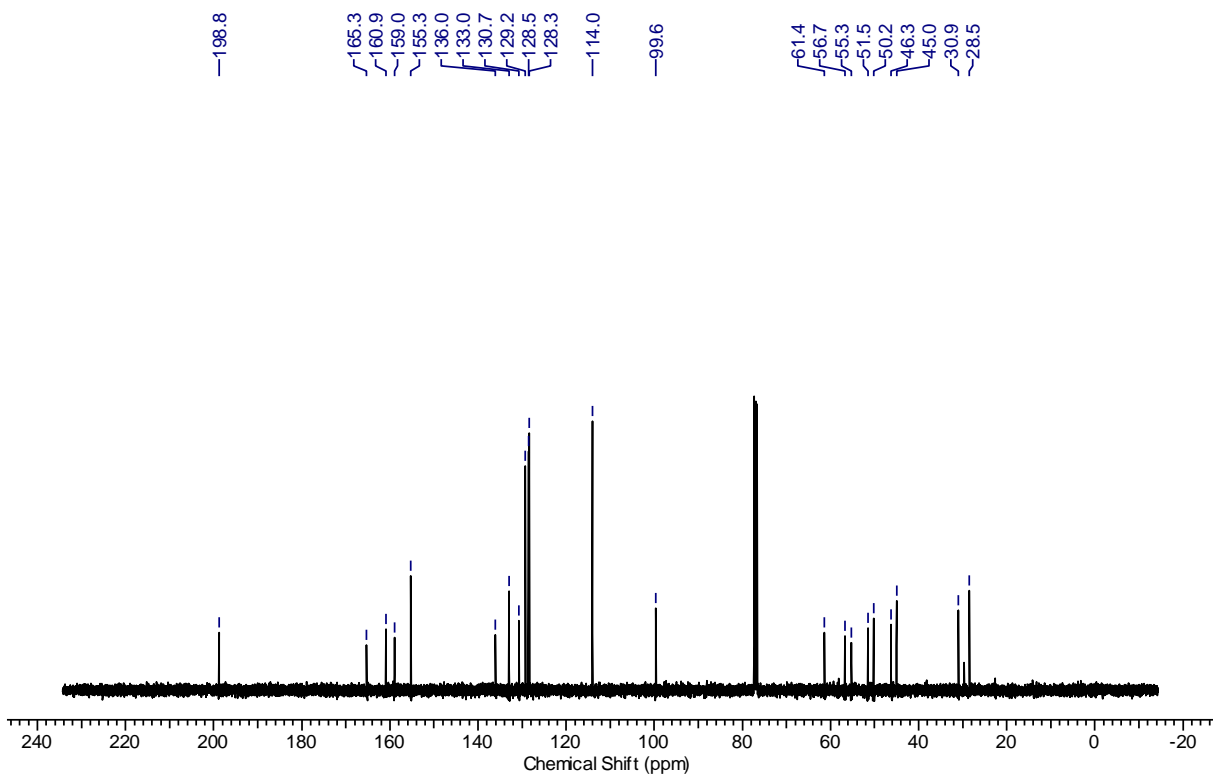

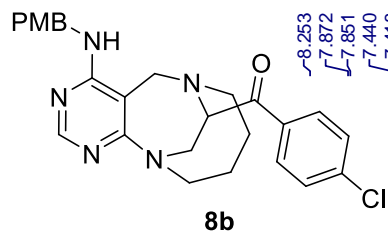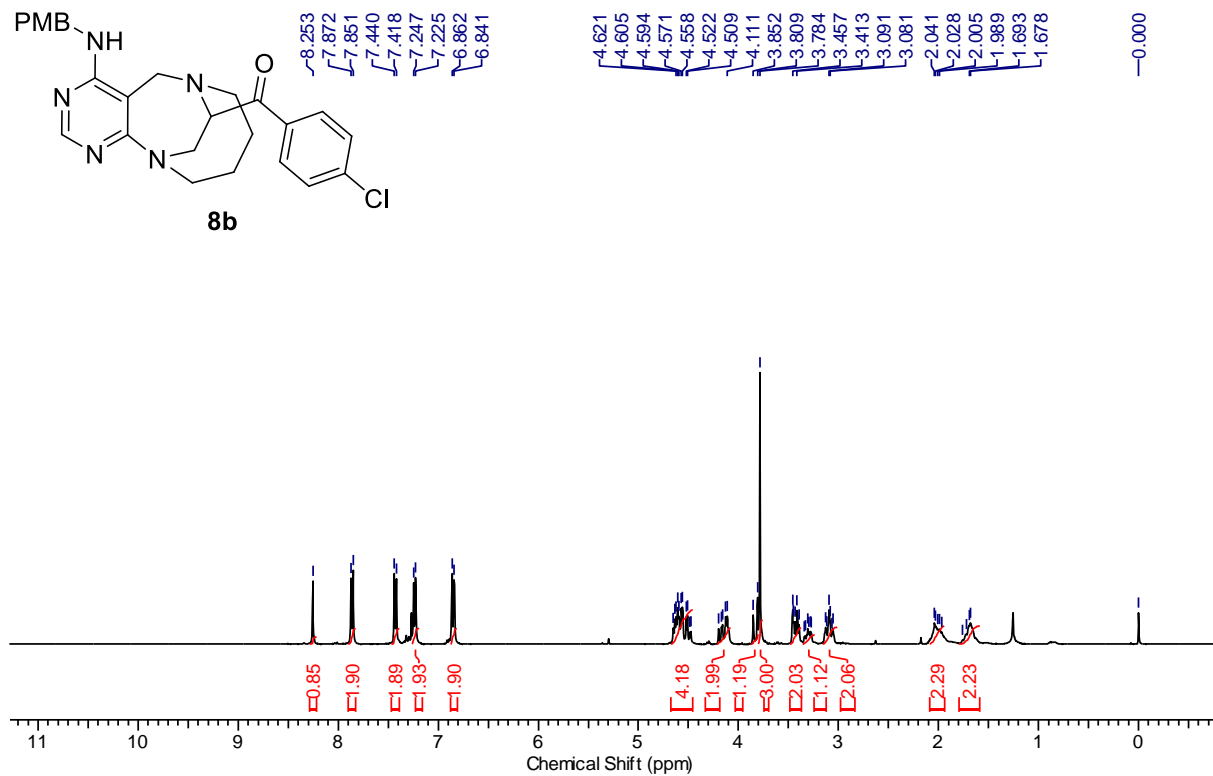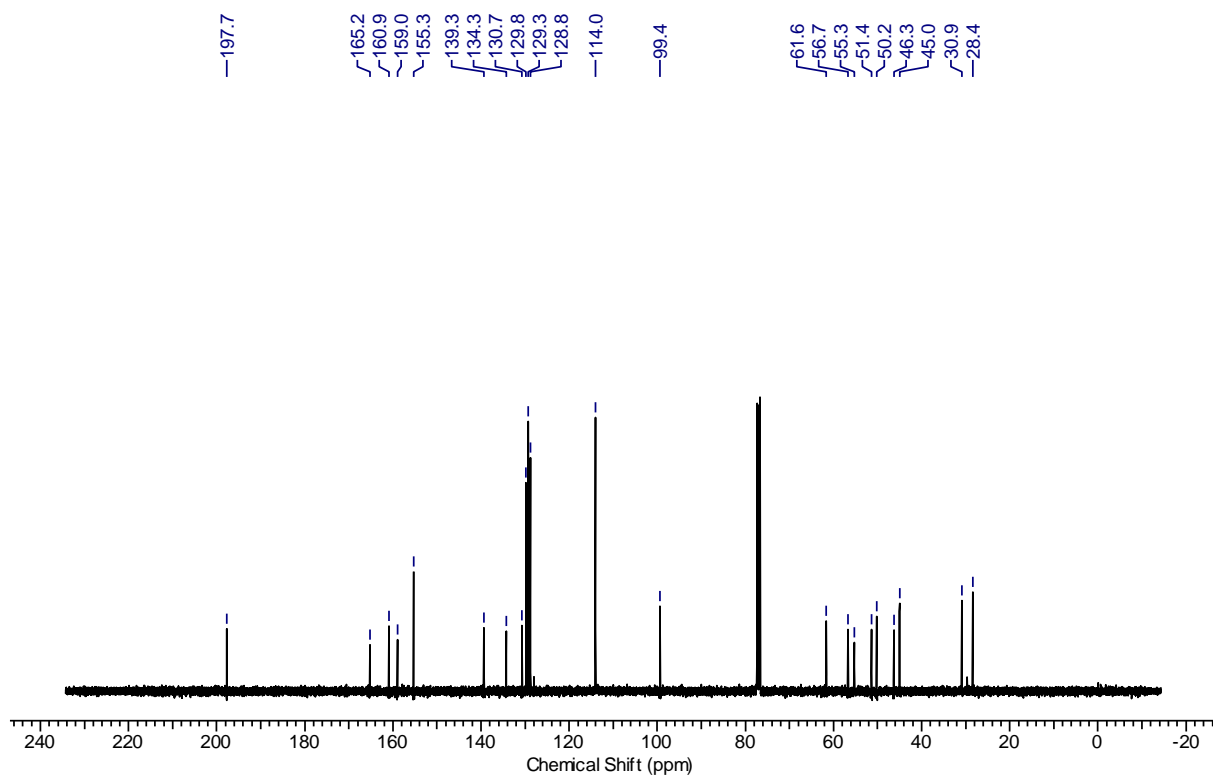

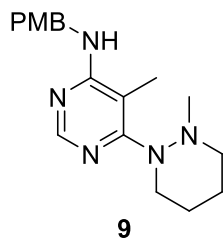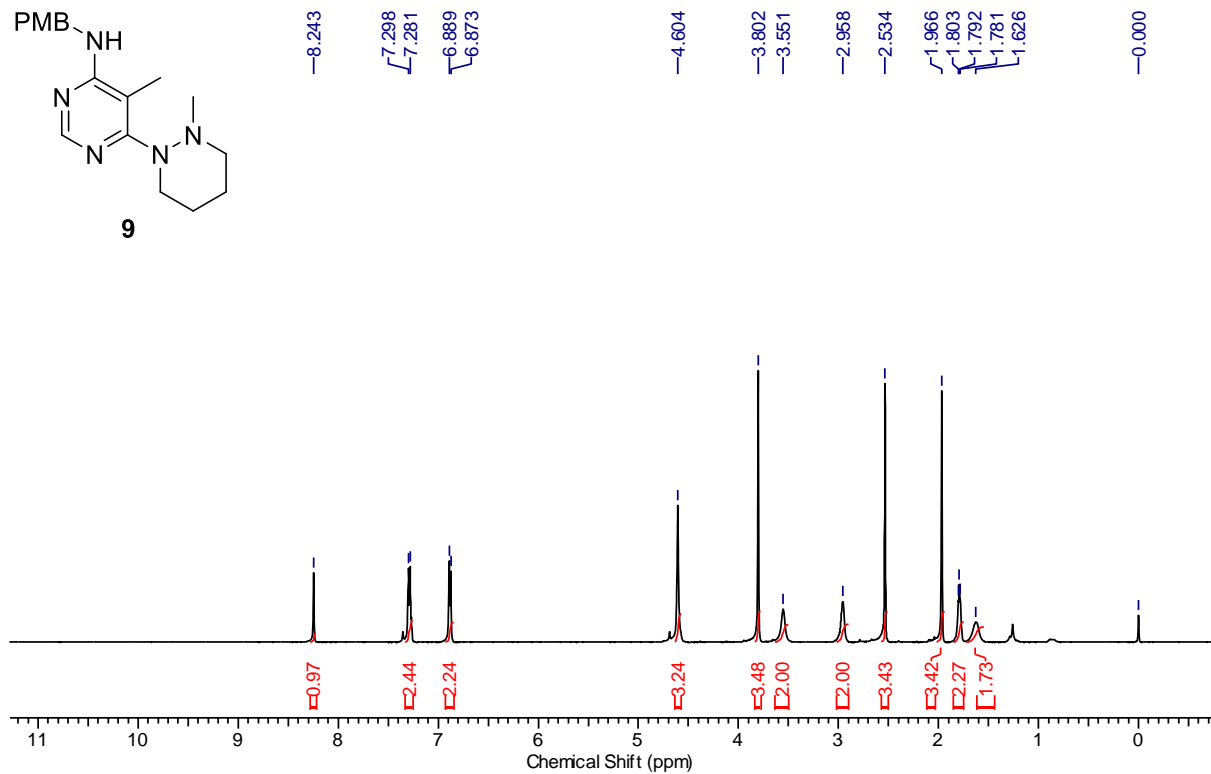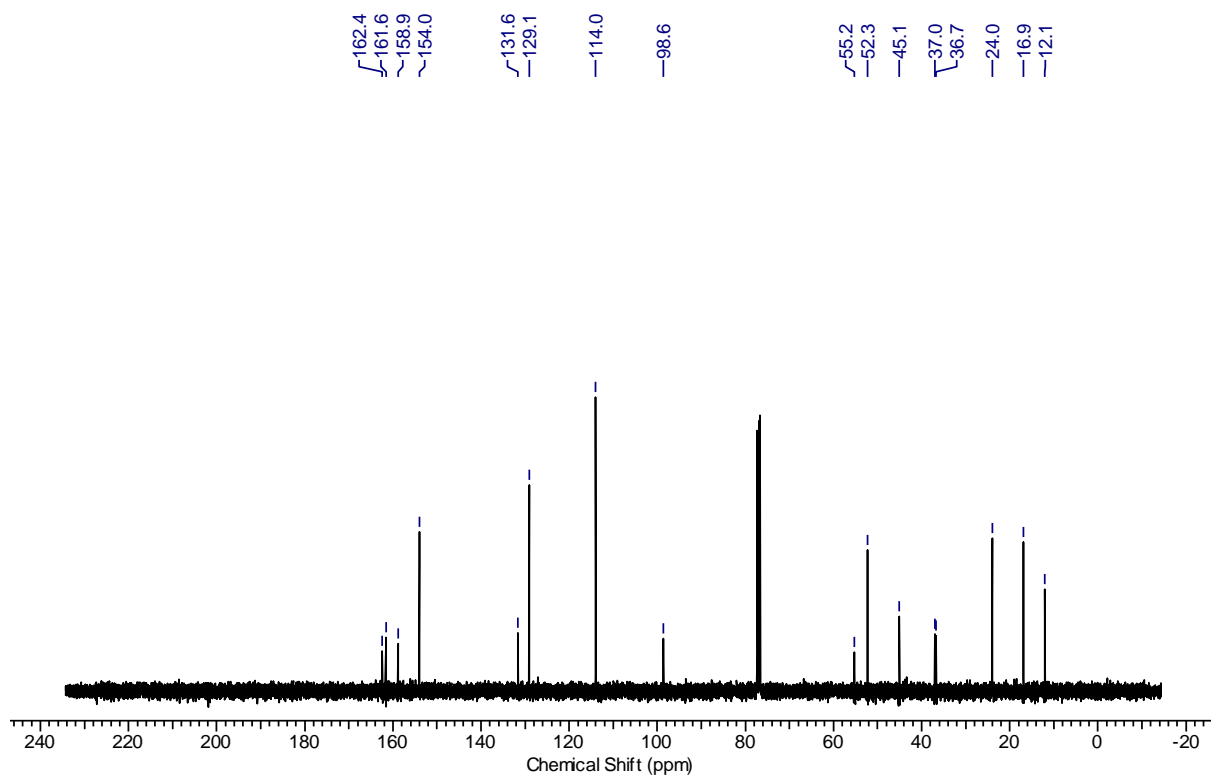

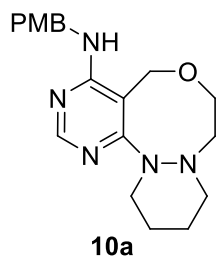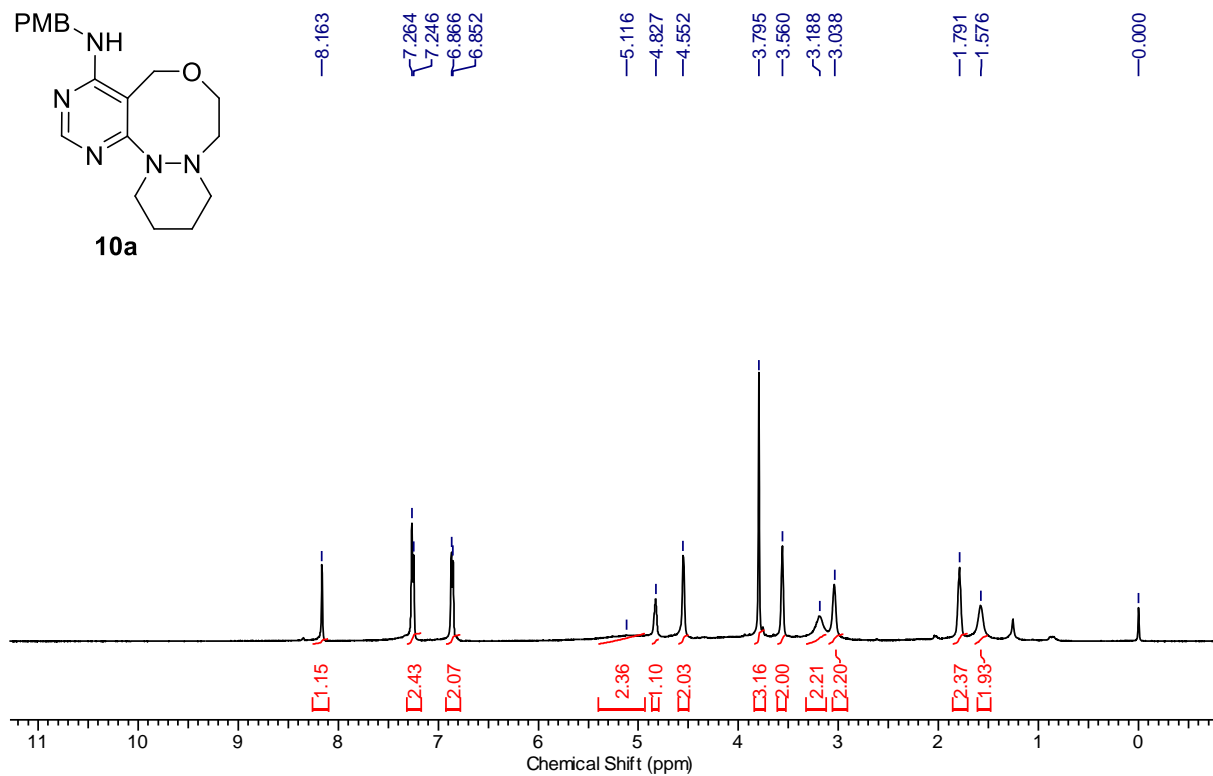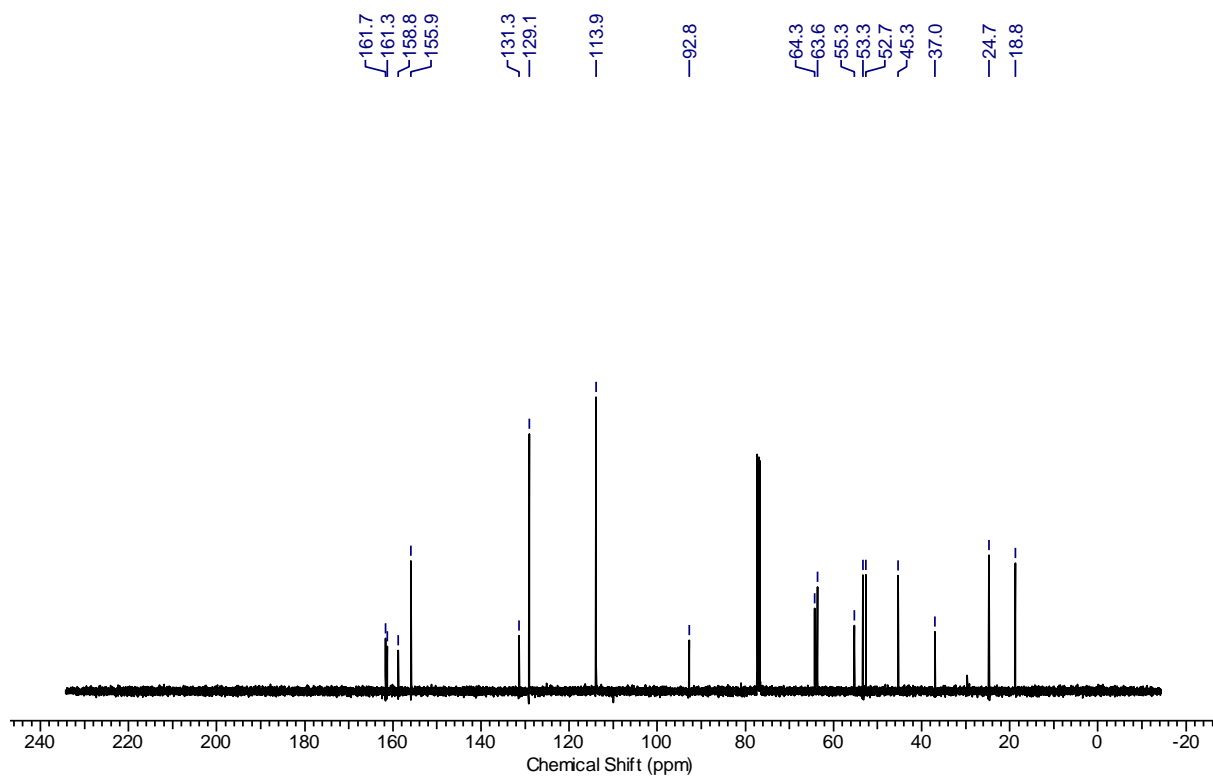

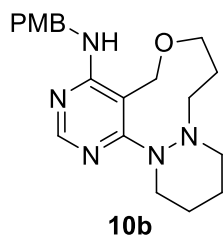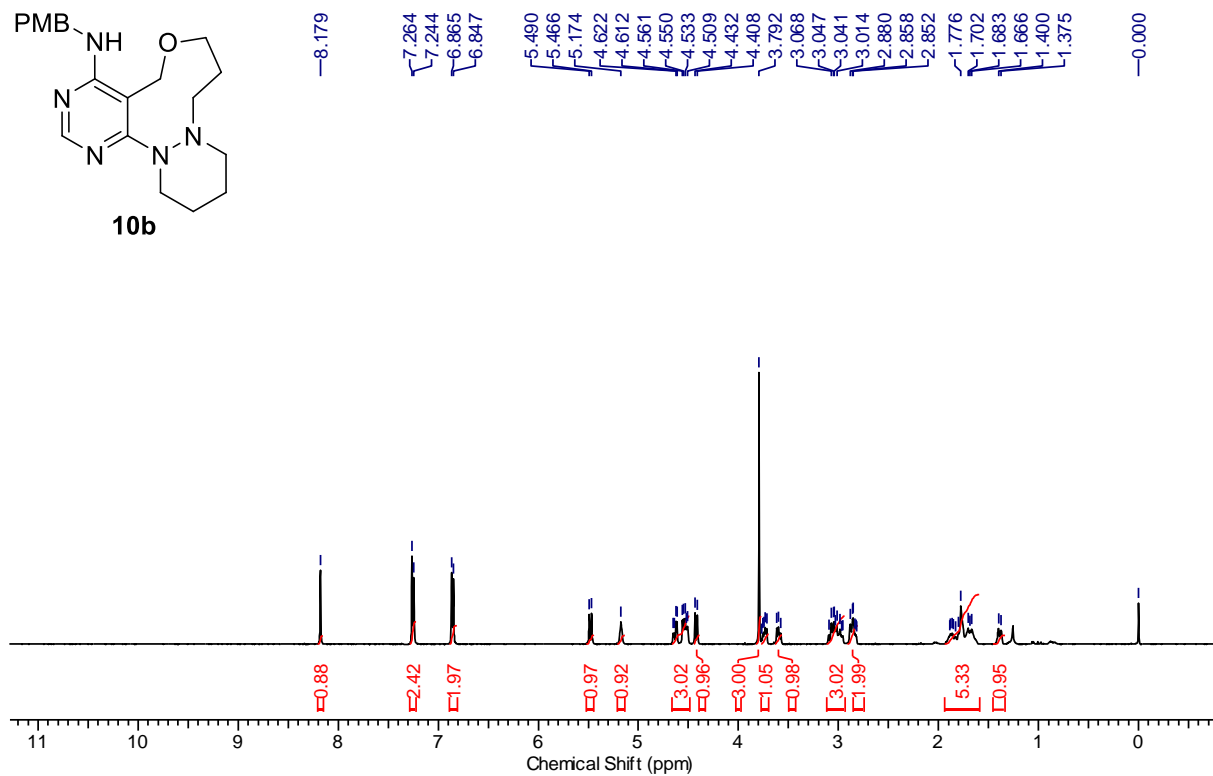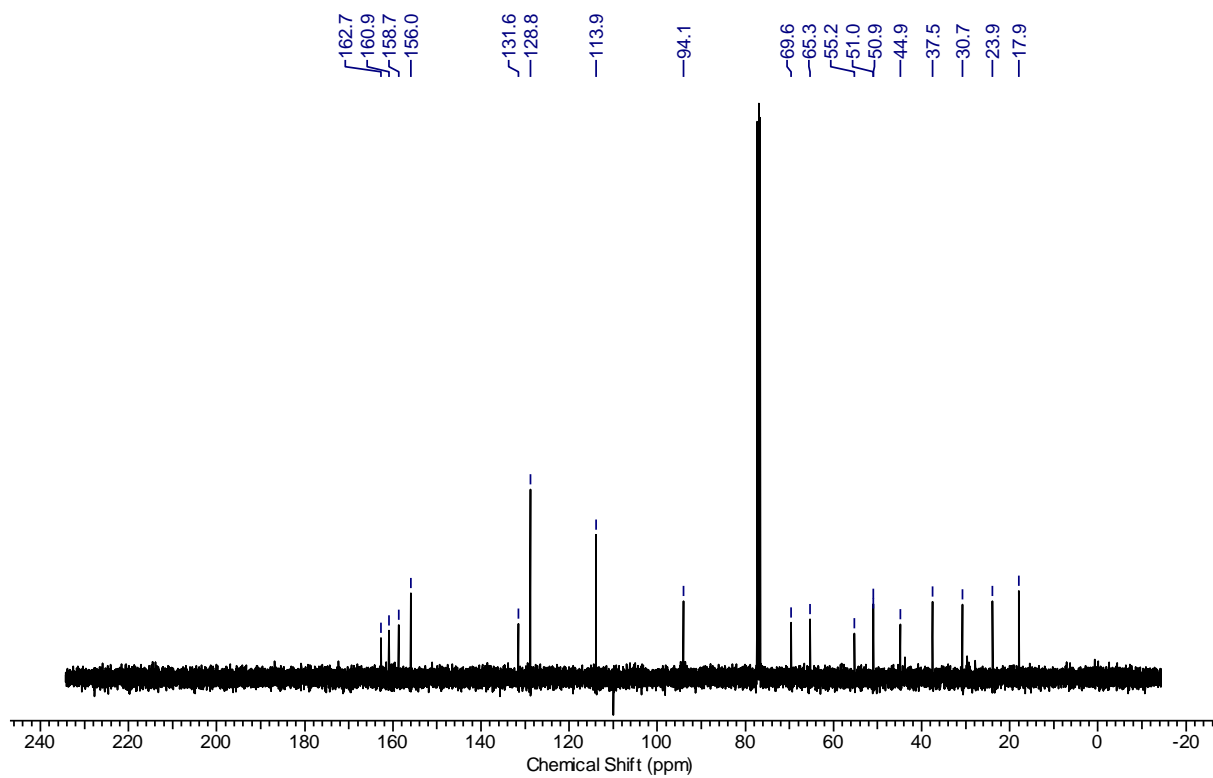

## VIII. References

- [1] Y. Choi, H. Kim, Y. -H. Shin, S. B. Park, *Chem. Commun.* **2015**, *51*, 13040–13043.
- [2] A. Füstner, L. C. Bouchez, L. Morency, J.-A. Funel, V. Liepins, F.-H. Porée, R. Gilmour, D. Laurich, F. Beaufils, M. Tamiya, *Chem. Eur. J.* **2009**, *15*, 3983–4010.
- [3] A. Hussain, S. K. Yousuf, D. Mukherjee, *RSC Adv.*, **2014**, *4*, 43241–43257.
